# Supplementary material for: Disease Specific Bacterial Communities in a Coralline Algae of the Northwestern Mediterranean Sea: A Combined Culture Dependent and -Independent Approach
Source: Front Microbiol. 2019 Aug 28;10:1850. doi: 10.3389/fmicb.2019.01850 (PMC6722220; doi:10.3389/fmicb.2019.01850)
Supplement: Supplementary file 1 [file Table_1.xlsx]

## Sheet: OTUtax_NGS_seq
Supplementary Table 1. ASV table showing the reference sequence, its taxonomy and its relative abundance in the different samples.
OTU	Sequence	He1	Dis1	He2	Dis2	He3	Dis3	He5	Dis5	He6	He7	He8	He9	He10	Kingdom	Phylum	Class	Order	Family	Genus
OTU_434	ACGAACGCTGGCGGCAGGCCTAACACATGCAAGTCGAGCGCACCTTCGGGTGAGCGGCGAACGGGTTAGTAACGCGTGGGAACGTGCCCTTCTCTAAGGAATAGCCTCTGGAAACGGAGAGTAATACCTTATACGCCCTTTGGGGGAAAGATTTATCGGAGAAGGATCGGCCCGCGTTGGATTAGGTAGTTGGTGAGGTAACGGCTCACCAAGCCGACGATCCATAGCTGGTTTGAGAGGATGATCAGCAACACTGGGACTGAGACACGGCCCAGACTCCTACGGGAGGCAGCAGTGGGGAATCTTAGACAATGGGGGCAACCCTGATCTAGCCATGCCGCGTGAGTGATGAAGGCCCTAGGGTCGTAAAGCTCTTTCGCCAGGGATGATAATGACAGT…	0.0905125	0.0113519	0	0.0692986	0.12049	0.0392157	0.518815	0.00833868	0.207821	0.10979	0.197592	0.389571	0.0634615	Bacteria	Proteobacteria	Alphaproteobacteria	Rhodobacterales	Rhodobacteraceae	Actibacterium
OTU_736	ACGAACGCTGGCGGCAGGCCTAACACATGCAAGTCGAGCGAACCTTCGGGTTAGCGGCGGACGGGTTAGTAACGCGTGGGAACGTGCCCATCTCTAAGGAATAGCCACTGGAAACGGTGAGTAATACCTTATACGCCCTTCGGGGGAAAGAATTTCGGAGATGGATCGGCCCGCGTTAGATTAGGTAGTTGGTGGGGTAATGGCCTACCAAGCCTACGATCTATAGCTGGTTTGAGAGGATGATCAGCAACACTGGGACTGAGACACGGCCCAGACTCCTACGGGAGGCAGCAGTGGGGAATCTTCGGCAATGGGGGCAACCCTGACCGAGCCATGCCGCGTGAGTGATGAAGGCCTTAGGGTCGTAAAGCTCTTTCGCCAGAGATGATAATGACAGTA…	0	0	0.0108696	0.587568	0	0	0	0	0	0	0	0	0	Bacteria	Proteobacteria	Alphaproteobacteria	Rhodobacterales	Rhodobacteraceae	Roseovarius
OTU_945	ACGAACGCTGGCGGCAGGCCTAACACATGCAAGTCGAACGCTCCCTTCGGGGAGAGTGGCGCACGGGTGCGTAACGCGTGGGAACCTACCCTTTAGTAAGGAACAACGTTTGGAAACGAACGCTAATACCTTATACGCCCTTCGGGGGAAAGATTTATCGCTAAAGGATGGGCCCGCGTTAGATTAGGTAGTTGGTGAGGTAATGGCTCACCAAGCCTACGATCTATAGCTGGTCTGAGAGGATGATCAGCCACACTGGAACTGAGACACGGTCCAGACTCCTACGGGAGGCAGCAGTGGGGAATATTGGACAATGGGGGCAACCCTGATCCAGCCATGCCGCGTGCAGGATGAAGGCCTTCGGGTTGTAAACTGCTTTCACCGACGACGATGATGACG…	0	0.515996	0	0	0	0	0	0.0301475	0	0	0	0	0	Bacteria	Proteobacteria	Alphaproteobacteria	NA	NA	NA
OTU_1092	ACGAACGCTGGCGGCAGGCTTAACACATGCAAGTCGAACGATCCTTCGGGATAGTGGCAGACGGGTGAGTAACGCGTGGGAACCTACCTTATTCTACGGAATAACAGTTAGAAATGACTGCTAATACCGTATACGCCCTTTGGGGGAAAGATTTATCGGAGTAGGATGGGCCCGCGTTGGATTAGCTAGTTGGTGGGGTAATGGCCTACCAAGGCGACGATCTATAGCTGGTCTGAGAGGATGATCAGCCACACTGGAACTGAGACACGGTCCAGACTCCTACGGGAGGCAGCAGTGGGGAATATTGGACAATGGGGGCAACCCTGATCCAGCCATGCCGCGTGAGTGATGAAGGCCCTAGGGTTGTAAAGCTCTTTCAACGGTGAAGATAATGACGGT…	0	0.0660475	0	0.0919782	0.0639891	0.202164	0	0.0923669	0	0	0	0	0	Bacteria	Proteobacteria	Alphaproteobacteria	Rhizobiales	Phyllobacteriaceae	Hoeflea
OTU_1224	ACGAACGCTGGCGGCAGGCCTAACACATGCAAGTCGAGCGCACCTTCGGGTGAGCGGCGGACGGGTGAGTAACGCGTGGGAATATACCCTTCTCTGCGGAATAGCCTCTGGAAACGGAGAGTAATACCGCATACGCCCTTCGGGGGAAAGATTTATCGGAGAAGGATTAGCCCGCGTTAGATTAGATAGTTGGTGGGGTAACGGCCTACCAAGTCTACGATCTATAGCTGGTTTTAGAGGACGATCAGCCACACTGGGACTGAGACACGGCCCAGACTCCTACGGGAGGCAGCAGTGGGGAATCTTAGACAATGGGCGAAAGCCTGATCTAGCCATGCCGCGTGAGTGATGAAGGCCCTAGGGTCGTAAAGCTCTTTCGCCAGGGATGATAATGACAGT…	0.044711	0.0237358	0.120553	0.0352793	0.0415248	0.0412441	0.0480384	0.0186017	0	0.021043	0.0686969	0.0398773	0	Bacteria	Proteobacteria	Alphaproteobacteria	Rhodobacterales	Rhodobacteraceae	Roseobacter
OTU_1455	ACGAACGCTGGCGGCAGGCCTAACACATGCAAGTCGAGCGCCCCTTCGGGGGAGCGGCGGACGGGTTAGTAACGCGTGGGAACGTACCCAAAGGTACGGAATAGCCTCGGGAAACTGAGAGTAATACCGTATATTTCCTCCGGGAGAAAGATTTATCGCCTTTGGATCGGCCCGCGTTAGATTAGATAGTTGGTGGGGTAATGGCCTACCAAGTCTACGATCTATAGCTGGTTTGAGAGGATGATCAGCAACACTGGGACTGAGACACGGCCCAGACTCCTACGGGAGGCAGCAGTGGGGAATCTTGGACAATGGGCGCAAGCCTGATCCAGCCATGCCGCGTGAGTGACGAAGGCCTTAGGGTCGTAAAGCTCTTTCGCCTGTGAAGATAATGACGGT…	0.0687023	0	0.0326087	0	0.0183799	0.0250169	0	0	0.102793	0.0539799	0.0977337	0.0515337	0.0903846	Bacteria	Proteobacteria	Alphaproteobacteria	Rhodobacterales	Rhodobacteraceae	NA
OTU_1445	ACGAACGCTGGCGGCAGGCCTAACACATGCAAGTCGAGCGCACTCTTCGGAGTGAGCGGCGGACGGGTTAGTAACGCGTGGGAACATACCCTTCTCTACGGAATAGCCTCGGGAAACTGAGAGTAATACCGTATACGCCCTTCGGGGGAAAGATTTATCGGAGATGGATTGGCCCGCGTTAGATTAGATAGTTGGTGGGGTAATGGCCTACCAAGTCTACGATCTATAGCTGGTTTGAGAGGATGATCAGCAACACTGGGACTGAGACACGGCCCAGACTCCTACGGGAGGCAGCAGTGGGGAATCTTAGACAATGGGCGAAAGCCTGATCTAGCCATGCCGCGTGAGTGACGAAGGCCTTAGGGTCGTAAAGCTCTTTCGCCAGGGATGATAATGACA…	0.0774264	0.0221878	0.0602767	0.0130197	0.0211028	0.0243408	0.0232186	0	0.103911	0.0187557	0.0240793	0.00981595	0.0788462	Bacteria	Proteobacteria	Alphaproteobacteria	Rhodobacterales	Rhodobacteraceae	Loktanella
OTU_1933	ACGAACGCTGGCGGCAGGCCTAACACATGCAAGTCGAGCGCACCTTCGGGTGAGCGGCGGACGGGTTAGTAACGCGTGGGAACGTACCCAGATCTACGGAATAGCCTTTGGAAACGAAGAGTAATACCGTATACGCCCTTCGGGGGAAAGATTTATCGGATTTGGATCGGCCCGCGTTAGATTAGATAGTTGGTGGGGTAACGGCCTACCAAGTCTACGATCTATAGCTGGTTTGAGAGGATGATCAGCAACACTGGGACTGAGACACGGCCCAGACTCCTACGGGAGGCAGCAGTGGGGAATCTTAGACAATGGGCGAAAGCCTGATCTAGCCATGCCGCGTGAGTGACGAAGGCCCTAGGGTCGTAAAGCTCTTTCGCCAGGGATGATAATGACAGT…	0	0.0557276	0	0	0	0	0	0.226427	0	0	0	0	0	Bacteria	Proteobacteria	Alphaproteobacteria	Rhodobacterales	Rhodobacteraceae	NA
OTU_1404	ACGAACGCTGGCGGCACGCCTAACACATGCAAGTCGAGCGCTCACTTCGGTGGGAGCGGCGGACGGGTTAGTAACGCGTGGGAACATACCCAACACTACGGAATAGCCACTGGAAACGGTGAGTAATACCGTATACGCCCTTCGGGGGAAAGATTTATCGGTGATGGATTGGCCCGCGTTAGATTAGATAGTTGGTGGGGTAACGGCCTACCAAGTCTACGATCTATAGCTGGTTTGAGAGGATGATCAGCAACACTGGGACTGAGACACGGCCCAGACTCCTACGGGAGGCAGCAGTGGGGAATCTTAGACAATGGGCGAAAGCCTGATCTAGCGATGCCGCGTGAGTGACGAAGGCCTTAGGGTCGTAAAGCTCTTTCGCCAGGGATGATAATGACA…	0	0	0	0	0.0292716	0	0.0288231	0.242463	0	0	0	0	0	Bacteria	Proteobacteria	Alphaproteobacteria	Rhodobacterales	Rhodobacteraceae	Loktanella
OTU_2095	ACGAACGCTGGCGGCAGGCCTAACACATGCAAGTCGAACGCACTCTTCGGAGTGAGTGGCGCACGGGTGAGTAACGCGTGGGAACCTGCCCTGGGGTTGGGAATAACCGCTGGAAACGGCGGCTAATACCCGATACGCCTTATGAGGGAAAGATTTATCGCCCTGGGATGGGCCCGCGTCCGATTAGCTTGTTGGTGGGGTAATGGCCCACCAAGGCTACGATCGGTAGCTGGTCTGAGAGGATGATCAGCCACACTGGGACTGAGACACGGCCCAGACTCCTACGGGAGGCAGCAGTGGGGAATCTTGGACAATGGGGGCAACCCTGATCCAGCCATGCCGCGTGGGTGAAGAAGGCCTTAGGGTTGTAAAGCCCTTTCAGTCGTGACGATGATGACG…	0.0174482	0.0495356	0	0	0	0.0804598	0	0	0	0.0416285	0.0424929	0.0220859	0	Bacteria	Proteobacteria	Alphaproteobacteria	Rhodospirillales	Rhodospirillaceae	Fodinicurvata
OTU_2046	ACGAACGCTGGCGGCACGCCTAACACATGCAAGTCGAGCGCACCTTCGGGTGAGCGGCGGACGGGTTAGTAACGCGTGGGAACATACCCAACACTACGGAATAGCCTTTGGAAACGAAGAGTAATACCGTATACGCCCTTCGGGGGAAAGATTTATCGGTGATGGATTGGCCCGCGTTAGATTAGATAGTTGGTGGGGTAACGGCCTACCAAGTCTACGATCTATAGCTGGTTTGAGAGGATGATCAGCAACACTGGGACTGAGACACGGCCCAGACTCCTACGGGAGGCAGCAGTGGGGAATCTTAGACAATGGGCGCAAGCCTGATCTAGCGATGCCGCGTGAGTGACGAAGGCCTTAGGGTCGTAAAGCTCTTTCGCCAGGGATGATAATGACAGT…	0.113413	0.0113519	0.0167984	0	0	0.0229885	0	0	0.0715084	0.0187557	0.0240793	0.0282209	0.0884615	Bacteria	Proteobacteria	Alphaproteobacteria	Rhodobacterales	Rhodobacteraceae	Loktanella
OTU_277	ACGAACGCTGGCGGCATGCCTAACACATGCAAGTCGAACGAACCCTTCGGGGTTAGTGGCGCACGGGTGCGTAACGCGTGGGAACCTGCCTTTAGGTTCGGAATAACTCAGAGAAATTTGAGCTAATACCGGATAATGTCTTCGGACCAAAGATTTATCGCCTTTAGATGGGCCCGCGTTAGATTAGATAGTTGGTGGGGTAATGGCCTACCAAGTCGACGATCTATAGCTGGTCTGAGAGGATGATCAGCCACACTGGGACTGAGACACGGCCCAGACTCCTACGGGAGGCAGCAGTGGGGAATATTGGACAATGGGCGAAAGCCTGATCCAGCAATGCCGCGTGAGTGATGAAGGCCTTAGGGTTGTAAAGCTCTTTTACTAGGGATGATAATGACA…	0.0185387	0	0.0335968	0.00881982	0.012934	0.0169033	0.0224179	0.00898012	0.0301676	0.0247027	0.0304533	0.0226994	0.0326923	Bacteria	Proteobacteria	Alphaproteobacteria	Sphingomonadales	Erythrobacteraceae	Erythrobacter
OTU_2835	ACGAACGCTGGCGGCAGGCCTAACACATGCAAGTCGAGCGCCCCTTCGGGGGAGCGGCGGACGGGTTAGTAACGCGTGGGAACGTACCCAAAGGTACGGAATAGCCTCGGGAAACTGAGAGTAATACCGTATATTTCCTCCGGGAGAAAGATTTATCGCCTTTGGATCGGCCCGCGTTAGATTAGATAGTTGGTGGGGTAACGGCTTACCAAGTCTACGATCTATAGCTGGTTTGAGAGGATGATCAGCAACACTGGGACTGAGACACGGCCCAGACTCCTACGGGAGGCAGCAGTGGGGAATCTTGGACAATGGGCGCAAGCCTGATCCAGCCATGCCGCGTGAGTGACGAAGGCCTTAGGGTCGTAAAGCTCTTTCGCCTGTGAAGATAATGACGGT…	0.0577972	0	0.0810277	0.0104998	0	0	0.0232186	0	0.0402235	0	0.0467422	0	0	Bacteria	Proteobacteria	Alphaproteobacteria	Rhodobacterales	Rhodobacteraceae	NA
OTU_2402	ACGAACGCTGGCGGCAGGCTTAACACATGCAAGTCGAACGCTCCCTTCGGGGAGAGTGGCAGACGGGTGAGTAACGCGTGGGGATATACCTATCGGTAGGGAACAACAGTTGGAAACGACTGCTAATACCTTATACGTCCTTCGGGAGAAAGATTTATCGCCGATAGATTAACCCGCGTTAGATTAGCTAGTTGGTAGGGTAATGGCCTACCAAGGCGACGATCTATAGCTGGTCTGAGAGGATGATCAGCCACACTGGGACTGAGACACGGCCCAGACTCCTACGGGAGGCAGCAGTGGGGAATATTGGACAATGGGCGCAAGCCTGATCCAGCCATGCCGCGTGAGTGATGAAGGCCCTAGGGTTGTAAAGCTCTTTCAACGGTGAAGATAATGACG…	0.0239913	0	0	0	0.0176991	0.0114943	0	0	0.0167598	0.0434584	0.0382436	0.0116564	0.0788462	Bacteria	Proteobacteria	Alphaproteobacteria	Rhizobiales	Phyllobacteriaceae	NA
OTU_2875	ACGAACGCTGGCGGCAGGCCTAACACATGCAAGTCGAGCGCTCTTTCGGGAGAGCGGCGGACGGGTGAGTAACGCGTGGGGATGTGCCCTTCACTGCGGAATAGCCTCTGGAAACGGAGAGTAATACCGCATACGCCCTTCGGGGGAAAGAATTTCGGTGAAGGATCAACCCGCGTTGGATTAGGTAGTTGGTGGGGTAACGGCCCACCAAGCCGACGATCCATAGCTGGTTTGAGAGGATGATCAGCCACACTGGGACTGAGACACGGCCCAGACTCCTACGGGAGGCAGCAGTGGGGAATCTTAGACAATGGGGGCAACCCTGATCTAGCCATGCCGCGTGAACGATGAAGGCCTTAGGGTTGTAAAGTTCTTTCAGCTGGGACGATAATGACGGTA…	0	0	0.0247036	0.0188996	0	0	0.0232186	0	0.0569832	0.0233303	0.0325779	0.0245399	0	Bacteria	Proteobacteria	Alphaproteobacteria	Rhodobacterales	Rhodobacteraceae	Falsirhodobacter
OTU_2886	ACGAACGCTGGCGGCAGGCTTAACACATGCAAGTCGAGCGCTCTCTTCGGAGGGAGCGGCGGACGGGTGAGTAACGCGTGGGAACGTGCCCTTTACTACGGAATAGCCTCTGGAAACGGAGATTAATACCGTATGTGCCCTTCGGGGGAAAGATTTATCGGTAAAGGATCGGCCCGCGTTAGATTAGGTAGTTGGTGGGGTAATGGCCTACCAAGCCGACGATCTATAGCTGGTTTGAGAGGATGATCAGCCACACTGGGACTGAGACACGGCCCAGACTCCTACGGGAGGCAGCAGTGGGGAATCTTAGACAATGGGGGCAACCCTGATCTAGCCATGCCGCGTGTGTGATGAAGGCCCTAGGGTCGTAAAGCACTTTCGCCTGTGAAGATAATGACG…	0.0479826	0	0.041502	0.00755985	0	0.0128465	0	0	0.0368715	0.0274474	0.0495751	0	0	Bacteria	Proteobacteria	Alphaproteobacteria	Rhodobacterales	Rhodobacteraceae	NA
OTU_3041	ACGAACGCTGGCGGCAGGCTTAACACATGCAAGTCGAGCGCCCACTTCGGTGGGAGCGGCAGACGGGTGAGTAACGCGTGGGAATATACCTATCTCTAGGGAACAACAGTTGGAAACGACTGCTAATGCCTTATACGCCCTTTGGGGGAAAGATTTATCGGAGATAGATTAGCCCGCGTTAGATTAGCTAGTTGGTGAGGTAATGGCTCACCAAGGCGACGATCTATAGCTGGTCTGAGAGGATGATCAGCCACACTGGAACTGAGACACGGTCCAGACTCCTACGGGAGGCAGCAGTGGGGAATATTGGACAATGGGCGCAAGCCTGATCCAGCCATGCCGCGTGAGTGATGAAGGCCTTAGGGTTGTAAAGCTCTTTCAACGGTGAAGATAATGACG…	0	0.00361197	0.0197628	0.00713986	0.0183799	0	0.0136109	0	0.0357542	0.0288198	0.0368272	0.0208589	0	Bacteria	Proteobacteria	Alphaproteobacteria	Rhizobiales	Phyllobacteriaceae	NA
OTU_3381	ACGAACGCTGGCGGCAGGCCTAACACATGCAAGTCGAGCGCACCTTCGGGTGAGCGGCGGACGGGTTAGTAACGCGTGGGAACGTACCCTTCTCTACGGAATAGCCTCGGGAAACTGAGAGTAATACCGTATACGCCCTTTGGGGGAAAGATTTATCGGAGAAGGATCGGCCCGCGTTAGATTAGGTAGTTGGTGGGGTAATGGCCTACCAAGCCTACGATCTATAGCTGGTTTTAGAGGATGATCAGCAACACTGGGACTGAGACACGGCCCAGACTCCTACGGGAGGCAGCAGTGGGGAATCTTAGACAATGGGGGAAACCCTGATCTAGCCATGCCGCGTGAGTGATGAAGGCCCTAGGGTCGTAAAGCTCTTTCGCCAGGGATGATAATGACAGT…	0.0196292	0	0.0286561	0	0.0136147	0	0	0	0.0536313	0.0105215	0.0276204	0.0343558	0	Bacteria	Proteobacteria	Alphaproteobacteria	Rhodobacterales	Rhodobacteraceae	NA
OTU_2183	ACGAACGCTGGCGGCAGGCTTAACACATGCAAGTCGAACGCCCTCTTCGGAGGGAGTGGCAGACGGGTGAGTAACGCGTGGGAAACTACCTATCAGTACGGAACAACAGTTAGAAATGACTGCTAATACCGTATACGTCCTTCGGGAGAAAGATTTATCGCTGATAGATGTGCCCGCGTTAGATTAGCTAGTTGGTGAGGTAATGGCTCACCAAGGCGACGATCTATAGCTGGTCTGAGAGGATGATCAGCCACACTGGAACTGAGACACGGTCCAGACTCCTACGGGAGGCAGCAGTGGGGAATATTGGACAATGGGCGCAAGCCTGATCCAGCCATGCCGCGTGAGTGATGAAGGCCCTAGGGTTGTAAAGCTCTTTCAACGGTGAAGATAATGACG…	0.0283533	0	0	0	0	0.0398918	0.0408327	0	0	0.0132662	0.0424929	0	0	Bacteria	Proteobacteria	Alphaproteobacteria	Rhizobiales	Phyllobacteriaceae	NA
OTU_3473	ACGAACGCTGGCGGCAGGCCTAACACATGCAAGTCGAGCGAACCTTCGGGTTAGCGGCGGACGGGTGAGTAACGCGTGGGAATATGCCCTTCACTGCGGAATAGCCTCTGGAAACGGAGAGTAATACCGCATACGCCCTTCGGGGGAAAGAATTTCGGTGAAGGATTAGCCCGCGTTAGATTAGGTAGTTGGTGGGGTAACGGCCTACCAAGCCTACGATCTATAGCTGGTTTGAGAGGATGATCAGCCACACTGGGACTGAGACACGGCCCAGACTCCTACGGGAGGCAGCAGTGAGGAATCTTAGACAATGGGGGAAACCCTGATCTAGCCATGCCGCGTGAGCGATGAAGGCCTTAGGGTTGTAAAGCTCTTTCGCCAGGGAAGATAATGACTGTA…	0	0	0.048419	0.0104998	0.0197413	0	0.00800641	0	0	0.0128088	0.026204	0.0104294	0.0576923	Bacteria	Proteobacteria	Alphaproteobacteria	Rhodobacterales	Rhodobacteraceae	NA
OTU_3689	ATGAACGCTGATAGTATGCTTTACACATGCAAGTTTAACGGAAATTTTTTCGTAGCGTACGGGTGAGTAGTGCGCAGAATTTTACCTTTCAGTTTTGAACAAACGTCATAACAAATTCAAAATAAAATCAATAAAAGGTTTGATTTTGAAAAATTAAACCGCTGAAAGATAAGTTTTGCGCAAGATTAGGTAGTTGGTAATTGTAAAAGCTTACCAAGCCTGCGATCTTTAGTTGGTCTAAGAGGATGATCAACCACATTGGAACTGGAATAAGGTCCAAGCCTATCGTTGGCCAGCAGTGAGGAATATTGGACAATGAACGAAAGTTTGATCCAGCAATACTATGTGAAGGAAGACGGCTTAACATGGTTGTAAACTTCTAAAGTTATTTTTGATAAT…	0	0	0	0.00923982	0.0211028	0.0216362	0.00640512	0.0416934	0	0.0178408	0.00566572	0.00306748	0	Bacteria	Proteobacteria	NA	NA	NA	NA
OTU_72	GCGAACGCTGGCGGCAGGCCTAACACATGCAAGTCGAACGGATCCTTCGGGATTAGTGGCGGACGGGTGAGTAACACGTGGGAACGTGCCCTTTGGTTCGGAACAACTCAGGGAAACTTGAGCTAATACCGGATGTGCCCTTCGGGGGAAAGATTTATCGCCATTGGAGCGGCCCGCGTCTGATTAGCTAGTTGGTGGGGTAAAGGCCCACCAAGGCGACGATCAGTAGCTGGTCTGAGAGGATGATCAGCCACATTGGGACTGAGACACGGCCCAAACTCCTACGGGAGGCAGCAGTGGGGAATCTTGCGCAATGGGCGAAAGCCTGACGCAGCCATGCCGCGTGAATGATGAAGGTCTTAGGATTGTAAAATTCTTTCACCGGGGACGATAATGACG…	0	0	0	0	0.0449285	0.0669371	0	0.0134702	0	0	0	0.00613497	0	Bacteria	Proteobacteria	Alphaproteobacteria	Caulobacterales	Caulobacteraceae	Caulobacter
OTU_3925	ACGAACGCTGGCGGCAGGCCTAACACATGCAAGTCGAACGCTCCCTTCGGGGAGAGTGGCGCACGGGTGCGTAACGCGTGGGAACCTACCCTTTAGTAAGGAACAACGTTTGGAAACGAACGCTAATACCTTATACGCCCTTCGGGGGAAAGATTTATCGCTACAGGATGGGCCCGCGTTAGATTAGGTAGTTGGTGAGGTAATGGCTCACCAAGCCTACGATCTATAGCTGGTCTGAGAGGATGATCAGCCACACTGGAACTGAGACACGGTCCAGACTCCTACGGGAGGCAGCAGTGGGGAATATTGGACAATGGGGGCAACCCTGATCCAGCCATGCCGCGTGCAGGATGAAGGCCTTCGGGTTGTAAACTGCTTTCACCGACGACGATGATGACG…	0	0.100619	0	0	0	0	0	0	0	0	0	0	0	Bacteria	Proteobacteria	Alphaproteobacteria	NA	NA	NA
OTU_3341	ACGAACGCTGGCGGCACGCCTAACACATGCAAGTCGAGCGCTCACTTCGGTGGGAGCGGCGGACGGGTTAGTAACGCGTGGGAACATACCCAACACTACGGAATAGCCACTGGAAACGGTGAGTAATACCGTATACGCCCTTCGGGGGAAAGATTTATCGGTGATGGATTGGCCCGCGTTAGATTAGATAGTTGGTGGGGTAACGGCCTACCAAGTCTACGATCTATAGCTGGTTTGAGAGGATGATCAGCAACACTGGGACTGAGACACGGCCCAGACTCCTACGGGAGGCAGCAGTGGGGAATCTTAGACAATGGGCGCAAGCCTGATCTAGCGATGCCGCGTGAGTGACGAAGGCCTTAGGGTCGTAAAGCTCTTTCGCCAGGGATGATAATGACA…	0	0.0118679	0.0148221	0	0	0.0425963	0	0	0.0201117	0.0123513	0.00424929	0.0177914	0	Bacteria	Proteobacteria	Alphaproteobacteria	Rhodobacterales	Rhodobacteraceae	Loktanella
OTU_4267	ACGAACGCTGGCGGCAGGCCTAACACATGCAAGTCGAGCGCACTCTTCGGAGTGAGCGGCGGACGGGTTAGTAACGCGTGGGAATATGCCCAATGGTAAGGAATAGCCTCTGGAAACGGAGAGTAATACCTTATGTGCCCTTCGGGGGAAAGATTTATCGCCATTGGATTAGCCCGCGTTGGATTAGGTAGTTGGTGGGGTAATGGCCTACCAAGCCTACGATCCATAGCTGGTTTGAGAGGATGATCAGCAACACTGGGACTGAGACACGGCCCAGACTCCTACGGGAGGCAGCAGTGGGGAATCTTAGACAATGGGCGAAAGCCTGATCTAGCCATGCCGCGTGAGTGACGAAGGCCCTAGGGTCGTAAAGCTCTTTCGCCAGGGATGATAATGACA…	0.0381679	0	0	0	0.0217835	0	0.0232186	0	0.0446927	0.0192132	0	0	0	Bacteria	Proteobacteria	Alphaproteobacteria	Rhodobacterales	Rhodobacteraceae	Litoreibacter
OTU_3788	ACGAACGCTGGCGGCAGGCCTAACACATGCAAGTCGAACGGATCCTTCGGGATTAGTGGCGCACGGGTGAGTAACGCGTGGAAATCTACCTCGGGATGGGGAATAACCATTGGAAACGATGGCTAATACCGCATACGCCGGAAACGGGAAAGCTTTATGCGTCCTGAGATGAGTCCGCGTTAGATTAGATAGTTGGTGGGGTAATGGCCTACCAAGTCGACGATCTATAGCTGGTCTGAGAGGATGATCAGCCACACTGGGACTGAGACACGGCCCAGACTCCTACGGGAGGCAGCAGTGGGGAATATTGGACAATGGGCGCAAGCCTGATCCAGCCATGCCGCGTGAGTGAAGAAGGCCTTAGGGTTGTAAAGCTCTTTCGACGGGGAAGATGATGAC…	0	0.0113519	0	0	0	0	0	0.0198845	0	0.0558097	0	0	0	Bacteria	Proteobacteria	Alphaproteobacteria	Rhodospirillales	Rhodospirillaceae	Pelagibius
OTU_4387	ACGAACGCTGGCGGCAGGCCTAACACATGCAAGTCGAACGCACTCTTCGGAGTGAGTGGCGCACGGGTGAGTAACGCGTGGGAACCTGCCCTGGGGTTGGGAATAACCGCTGGAAACGGCGGCTAATACCCGATACGCCTTATGAGGGAAAGATTTATCGCCCTGGGATGGGCCCGCGTCCGATTAGCTTGTTGGTGGGGTAATGGCCCACCAAGGCTGCGATCGGTAGCTGGTCTGAGAGGATGATCAGCCACACTGGGACTGAGACACGGCCCAGACTCCTACGGGAGGCAGCAGTGGGGAATCTTGGACAATGGGGGCAACCCTGATCCAGCCATGCCGCGTGGGTGAAGAAGGCCTTAGGGTTGTAAAGCCCTTTCAGTCGTGACGATGATGACG…	0	0	0	0	0.0313138	0.0425963	0	0	0	0.0292772	0	0	0	Bacteria	Proteobacteria	Alphaproteobacteria	Rhodospirillales	Rhodospirillaceae	Fodinicurvata
OTU_4408	ACGAACGCTGGCGGCAGGCCTAACACATGCAAGTCGAGCGCTCCTTCGGGAGAGCGGCGGACGGGTGAGTAACGCGTGGGGATGTGCCCAAAGGTACGGAATAGCCTCTGGAAACGGAGAGTAATACCGTATGTGCCCTTCGGGGGAAAGAATTTCGCCTTTGGATCAACCCGCGTTGGATTAGGTAGTTGGTGAGGTAACGGCTCACCAAGCCGACGATCCATAGCTGGTTTGAGAGGATGATCAGCCACACTGGGACTGAGACACGGCCCAGACTCCTACGGGAGGCAGCAGTGGGGAATCTTAGACAATGGGGGAAACCCTGATCTAGCCATGCCGCGTGAACGATGAAGGCCTTAGGGTTGTAAAGTTCTTTCAGCTGGGACGATAATGACGGTA…	0	0	0	0	0	0	0	0	0	0.0329369	0.0212465	0	0.134615	Bacteria	Proteobacteria	Alphaproteobacteria	Rhodobacterales	Rhodobacteraceae	Thioclava
OTU_4560	ACGAACGCTGGCGGCAGGCTTAACACATGCAAGTCGAGCGCTCTCTTCGGAGAGAGCGGCGGACGGGTGAGTAACGCGTGGGAACGTGCCCTTTACTACGGAATAGCCTCTGGAAACGGAGATTAATACCGTATGTGCCCTTCGGGGGAAAGATTTATCGGTAAAGGATCGGCCCGCGTTAGATTAGGTAGTTGGTGGGGTAATGGCCTACCAAGCCGACGATCTATAGCTGGTTTGAGAGGATGATCAGCCACACTGGGACTGAGACACGGCCCAGACTCCTACGGGAGGCAGCAGTGGGGAATCTTAGACAATGGGGGCAACCCTGATCTAGCCATGCCGCGTGTGTGATGAAGGCCCTAGGGTCGTAAAGCACTTTCGCCTGTGAAGATAATGACG…	0.040349	0	0	0	0.0136147	0	0.0256205	0	0	0	0	0.0263804	0.0634615	Bacteria	Proteobacteria	Alphaproteobacteria	Rhodobacterales	Rhodobacteraceae	NA
OTU_4915	ACGAACGCTGGCGGCAGGCTTAACACATGCAAGTCGAACGGTCTCTTCGGAGGCAGTGGCAGACGGGTGAGTAACGCGTGGGGATATACCTATTGGTAAGGAACAACAGTTGGAAACGACTGCTAATACCTTATACGTCCTTCGGGAGAAAGATTTATCGCCGATAGATTAACCCGCGTTAGATTAGCTAGTTGGTGAGGTAATGGCTCACCAAGGCGACGATCTATAGCTGGTCTGAGAGGATGATCAGCCACACTGGAACTGAGACACGGTCCAGACTCCTACGGGAGGCAGCAGTGGGGAATATTGGACAATGGGCGCAAGCCTGATCCAGCCATGCCGCGTGAGTGATGAAGGCCTTAGGGTTGTAAAGCTCTTTCAACGGTGAAGATAATGACG…	0	0	0	0.00671987	0	0	0.0176141	0.00898012	0.0178771	0.0137237	0.00424929	0.00552147	0.0711538	Bacteria	Proteobacteria	Alphaproteobacteria	Rhizobiales	Phyllobacteriaceae	Ahrensia
OTU_4937	ACGAACGCTGGCGGCAGGCCTAACACATGCAAGTCGAACGCACTCTTCGGAGTGAGTGGCGCACGGGTGAGTAACGCGTGGGAACCTGCCCTGGGGCCGGGAATAACCGCTGGAAACGGCGGCTAATACCCGATACGCCTTTAGAGGGAAAGATTTATCGCCCTGGGATGGGCCCGCGTCCGATTAGCTAGTTGGTGGGGTAATGGCCCACCAAGGCTTCGATCGGTAGCTGGTCTGAGAGGATGATCAGCCACACTGGGACTGAGACACGGCCCAGACTCCTACGGGAGGCAGCAGTGGGGAATCTTGGACAATGGGGGCAACCCTGATCCAGCCATGCCGCGTGGGTGAAGAAGGCCTTAGGGTTGTAAAGCCCTTTCAGTCGTGACGATGATGACG…	0	0	0	0	0	0	0	0	0	0.068161	0	0	0	Bacteria	Proteobacteria	Alphaproteobacteria	Rhodospirillales	Rhodospirillaceae	Fodinicurvata
OTU_1909	ACGAACGCTGGCGGCAGGCCTAACACATGCAAGTCGAGCGAGACCTTCGGGTCTAGCGGCGGACGGGTTAGTAACGCGTGGGAACGTACCCAGCTCTGCGGAATAGCCTCTGGAAACGGAGAGTAATACCGCATACGCCCTTCGGGGGAAAGAGTTTCGGGGTTGGATCGGCCCGCGTTAGATTAGGTAGTTGGTGGGGTAATGGCCTACCAAGCCTACGATCTATAGCTGGTTTGAGAGGATGATCAGCAACACTGGGACTGAGACACGGCCCAGACTCCTACGGGAGGCAGCAGTGGGGAATCTTCGGCAATGGGCGCAAGCCTGACCGAGCCATGCCGCGTGAGCGATGAAGGCCTTAGGGTTGTAAAGCTCTTTCGCCAGGGATGATAATGACAG…	0	0.0118679	0	0	0.04629	0.0121704	0	0	0	0	0.0113314	0	0	Bacteria	Proteobacteria	Alphaproteobacteria	Rhodobacterales	Rhodobacteraceae	Roseobacter_clade_CHAB-I-5_lineage
OTU_256	ACGAACGCTGGCGGCAGGCTTAACACATGCAAGTCGAACGAACTCTTCGGAGTGAGTGGCAGACGGGTGCGTAACACGTGGGAACCTACCTTAAGGTACGGAATAACATCGAGAAATCGTTGCTAATACCGTATGTGCCCTTCGGGGGAAAGATTTATCGCCTTAAGATGGGCCCGCGGCAGATTAGATAGTTGGTGGGGTAAAAGCCTACCAAGTCTACGATCTGTAGCTGGTCTGAGAGGATGATCAGCCACACTGGAACTGAGACACGGTCCAGACTCCTACGGGAGGCAGCAGTGGGGAATATTGGGCAATGGGCGAAAGCCTGACCCAGCCATGCCGCGTGAGTGATGAAGGCCTTAGGGTTGTAAAACTCTTTCGCCGGTGAAGATAATGACG…	0.0174482	0.00515996	0	0.00545989	0	0	0.0192154	0	0.0178771	0.00869167	0	0.0116564	0	Bacteria	Proteobacteria	Alphaproteobacteria	Parvularculales	Parvularculaceae	Parvularcula
OTU_6168	ACGAACGCTGGCGGCACGCCTAACACATGCAAGTCGAGCGCCCCTTCGGGGGAGCGGCGGACGGGTTAGTAACGCGTGGGAACATACCCTTTTCTGCGGAATAGCCTTTGGAAACGAAGAGTAATACCGCATACGCCCTTTGGGGGAAAGATTTATCGGTGAAGGATTGGCCCGCGTTAGATTAGATAGTTGGTGGGGTAATGGCCTACCAAGTCTACGATCTATAGCTGGTTTGAGAGGATGATCAGCAACACTGGGACTGAGACACGGCCCAGACTCCTACGGGAGGCAGCAGTGGGGAATCTTAGACAATGGGCGCAAGCCTGATCTAGCGATGCCGCGTGAGTGACGAAGGTCTTAGGATCGTAAAGCTCTTTCGCCAGGGATGATAATGACAGT…	0.040349	0	0	0.00293994	0	0.0148749	0.0040032	0.00705581	0.00446927	0.00686185	0	0.00736196	0	Bacteria	Proteobacteria	Alphaproteobacteria	Rhodobacterales	Rhodobacteraceae	NA
OTU_2294	ACGAACGCTGGCGGCAGGCCTAACACATGCAAGTCGAGCGCACCTTCGGGTGAGCGGCGGACGGGTGAGTAACGCGTGGGAATATACCCTTCTCTACGGAATAGCCTCGGGAAACTGAGAGTAATACCGTATACGCCCTTCGGGGGAAAGATTTATCGGAGAAGGATTAGCCCGCGTTAGATTAGATAGTTGGTGGGGTAATGGCCTACCAAGTCTACGATCTATAGCTGGTTTTAGAGGACGATCAGCCACACTGGGACTGAGACACGGCCCAGACTCCTACGGGAGGCAGCAGTGGGGAATCTTAGACAATGGGCGAAAGCCTGATCTAGCCATGCCGCGTGAGTGATGAAGGCCCTAGGGTCGTAAAGCTCTTTCGCCAGGGATGATAATGACAGT…	0	0	0	0	0	0	0	0	0	0	0	0.0355828	0.0903846	Bacteria	Proteobacteria	Alphaproteobacteria	Rhodobacterales	Rhodobacteraceae	Roseobacter
OTU_58	GCGAACGCTGGCGGCAGGCTTAACACATGCAAGTCGAGCGGGCGTAGCAATACGTCAGCGGCAGACGGGTGAGTAACGCGTGGGAACGTACCTTTTGGTTCGGAACAACACAGGGAAACTTGTGCTAATACCGGATAAGCCCTTACGGGGAAAGATTTATCGCCGAAAGATCGGCCCGCGTCTGATTAGCTAGTTGGTAGGGTAATGGCCTACCAAGGCGACGATCAGTAGCTGGTCTGAGAGGATGATCAGCCACATTGGGACTGAGACACGGCCCAAACTCCTACGGGAGGCAGCAGTGGGGAATATTGGACAATGGGGGCAACCCTGATCCAGCCATGCCGCGTGAGTGATGAAGGCCCTAGGGTTGTAAAGCTCTTTTGTGCGGGAAGATAATGA…	0	0	0	0	0.0313138	0.0378634	0	0	0	0	0	0	0	Bacteria	Proteobacteria	Alphaproteobacteria	Rhizobiales	Bradyrhizobiaceae	Bradyrhizobium
OTU_166	GCGAACGCTGGCGGCAGGCTTAACACATGCAAGTCGAGCGGGTCCTTCGGGGTCAGCGGCGGACGGGTGAGTAACGCGTGGGAACGTGCCTTCTGGTTCGGAATAACCCTGGGAAACTAGGGCTAATACCGGATACGCCCTTTTGGGGAAAGGTTTACTGCCGGAAGATCGGCCCGCGTCTGATTAGCTAGTTGGTGGGGTAACGGCCTACCAAGGCGACGATCAGTAGCTGGTCTGAGAGGATGATCAGCCACACTGGGACTGAGACACGGCCCAGACTCCTACGGGAGGCAGCAGTGGGGAATATTGGACAATGGGCGCAAGCCTGATCCAGCCATGCCGCGTGAGTGATGAAGGCCTTAGGGTTGTAAAGCTCTTTTATCCGGGACGATAATGACG…	0	0	0	0	0.0415248	0.0243408	0	0	0	0	0.00283286	0	0	Bacteria	Proteobacteria	Alphaproteobacteria	Rhizobiales	Methylobacteriaceae	Methylobacterium
OTU_7042	ACGAACGCTGGCGGCAGGCTTAACACATGCAAGTCGAACGGTCTCTTCGGAGGCAGTGGCAGACGGGTGAGTAACGCGTGGGAACCTACCTATTTCTACGGAACAACAGTTGGAAACGACTGCTAATACCGTATACGCCCTTCGGGGGAAAGATTTATCGGAAATAGATGGGCCCGCGTTAGATTAGCTAGTTGGTGAGGTAATGGCTCACCAAGGCGACGATCTATAGCTGGTCTGAGAGGATGATCAGCCACACTGGAACTGAGACACGGTCCAGACTCCTACGGGAGGCAGCAGTGGGGAATATTGGACAATGGGCGCAAGCCTGATCCAGCCATGCCGCGTGAGTGATGAAGGCCTTAGGGTTGTAAAGCTCTTTCAACGGTGAAGATAATGACG…	0	0	0	0.00461991	0.0149762	0	0.0144115	0	0	0.00594694	0.0155807	0.00306748	0.00961538	Bacteria	Proteobacteria	Alphaproteobacteria	Rhizobiales	Phyllobacteriaceae	NA
OTU_7160	ACGAACGCTAGTGGTTAGCTTAACACATGCAAGTCGAACGGAAACCACTGTTATTCAGAGTTTCCGTGGCGAACGGGTGAGTAATACTTAGGAATTTGCCTGGAGGAGCTGGTTCAAGGGCTAAGGGTTTTTAACCTATGCTCGAATCCCGCACACTAAAAATTTAGATAGCTTAAATGCGCCTTCAGATAAGCCTAAGCAGGATTAGGTATTGCGTGAGGTAATGGCTTACGTAGCCAACGATCCTTAGCGGGCTTGAAAGAGCGATCCGCCACACTGGAACTGAGACACGGTCCAGACTCTTTTTGAGGCAGCAGTGAGGAATCTTGGACAATGGACGAAAGTCTGATCCAGCTAAACCACATGGGTGATTTGAAGGCTTCTTTGCTGTAAAACCCT…	0	0	0	0.00125997	0.00476515	0.015551	0	0.00513149	0	0.00594694	0	0.0245399	0	Bacteria	NA	NA	NA	NA	NA
OTU_7475	ACGAACGCTGGCGGCACGCCTAACACATGCAAGTCGAGCGCTACCTTCGGGTGGAGCGGCGGACGGGTTAGTAACGCGTGGGAACATGCCCTTTTCTACGGAATAGCCTCGGGAAACTGAGAGTAATACCGTATACGCCCTTTGGGGGAAAGATTTATCGGAGAAGGATTGGCCCGCGTTAGATTAGATAGTTGGTGGGGTAATGGCCTACCAAGTCTACGATCTATAGCTGGTTTGAGAGGATGATCAGCAACACTGGGACTGAGACACGGCCCAGACTCCTACGGGAGGCAGCAGTGGGGAATCTTAGACAATGGGCGCAAGCCTGATCTAGCGATGCCGCGTGAGTGACGAAGGTCTTAGGATCGTAAAGCTCTTTCGCCAGGGATGATAATGACA…	0.0218103	0	0.0247036	0	0.0204221	0	0	0	0.0156425	0	0	0	0	Bacteria	Proteobacteria	Alphaproteobacteria	Rhodobacterales	Rhodobacteraceae	Loktanella
OTU_7726	ACGAACGCTGGCGGCAGGCTTAACACATGCAAGTCGAACGCCCTCTTCGGAGGGAGTGGCAGACGGGTGAGTAACGCGTGGGAAACTACCTATCAGTACGGAACAACAGTTAGAAATGACTGCTAATACCGTATACGTCCTTCGGGAGAAAGATTTATCGCTGATAGATGTGCCCGCGTTAGATTAGCTAGTTGGTGAGGTAATGGCTCACCAAGGCGACGATCTATAGCTGGTCTGAGAGGATGATCAGCCACACTGGAACTGAGACACGGTCCAGACTCCTACGGGAGGCAGCAGTGGGGAATATTGGACAATGGGCGCAAGCCTGATCCAGCCATGCCGCGTGAGTGATGAAGGCCTTAGGGTTGTAAAGCTCTTTCAACGGTGAAGATAATGACG…	0	0	0.0247036	0	0	0	0.0040032	0	0.00670391	0.000457457	0.00708215	0.0153374	0.025	Bacteria	Proteobacteria	Alphaproteobacteria	Rhizobiales	Phyllobacteriaceae	NA
OTU_2173	ACGAACGCTGGCGGCAGGCCTAACACATGCAAGTCGAGCGCACCTTCGGGTGAGCGGCGGACGGGTTAGTAACGCGTGGGAACGTGCCCTTCTCTAAGGAATAGCCTCTGGAAACGGAGAGTAATACCTTATACGCCCTTTGGGGGAAAGATTTATCGGAGAAGGATCGGCCCGCGTTGGATTAGGTAGTTGGTGAGGTAACGGCTCACCAAGCCGACGATCCATAGCTGGTTTGAGAGGATGATCAGCAACACTGGGACTGAGACACGGCCCAGACTCCTACGGGAGGCAGCAGTGGGGAATCTTAGACAATGGGGGAAACCCTGATCTAGCCATGCCGCGTGAGTGATGAAGGCCCTAGGGTCGTAAAGCTCTTTCGCCAGGGATGATAATGACAGT…	0	0	0	0	0	0.0567951	0	0	0	0	0	0	0	Bacteria	Proteobacteria	Alphaproteobacteria	Rhodobacterales	Rhodobacteraceae	Actibacterium
OTU_2115	ACGAACGCTGGCGGCAGGCTTAACACATGCAAGTCGAACGCCCTCTTCGGAGGGAGTGGCAGACGGGTGAGTAACGCGTGGGAACCTACCTTTAGGTACGGAATAACAGTTAGAAATGACTGCTAATACCGTATGTGCCCGAGAGGGGAAAGATTTATCGCCTAAAGATGGGCCCGCGTTGGATTAGCTAGTTGGTGAGGTAATGGCTCACCAAGGCGACGATCCATAGCTGGTTTGAGAGGATGATCAGCCACACTGGAACTGAGACACGGTCCAGACTCCTACGGGAGGCAGCAGTGGGGAATATTGGACAATGGGGGAAACCCTGATCCAGCCATGCCGCGTGAGTGATGAAGGCCTTAGGGTTGTAAAGCTCTTTCGCTGGGGAAGATAATGACG…	0	0	0	0	0	0	0	0.0134702	0	0.0283623	0	0	0	Bacteria	Proteobacteria	Alphaproteobacteria	Rhizobiales	Phyllobacteriaceae	Cohaesibacter
OTU_8014	ACGAACGCTGGCGGCAGGCTTAACACATGCAAGTCGAACGCCCTCTTCGGAGGGAGTGGCAGACGGGTGAGTAACGCGTGGGAACCTACCTTTAGGTACGGAATAACAGTTAGAAATGACTGCTAATACCGTATGTGCCCGAGAGGGGAAAGATTTATCGCCTAAAGATGGGCCCGCGTTGGATTAGTTAGTTGGTGAGGTAACGGCTCACCAAGGCGACGATCCATAGCTGGTTTGAGAGGATGATCAGCCACACTGGAACTGAGACACGGTCCAGACTCCTACGGGAGGCAGCAGTGGGGAATATTGGACAATGGGGGAAACCCTGATCCAGCCATGCCGCGTGAGTGATGAAGGCCTTAGGGTTGTAAAGCTCTTTCGCTGGGGAAGATAATGACG…	0	0	0.0503953	0.00587988	0.0108918	0	0	0	0	0	0	0	0	Bacteria	Proteobacteria	Alphaproteobacteria	Rhizobiales	Phyllobacteriaceae	Cohaesibacter
OTU_8488	ACGAACGCTGGCGGCAGGCCTAACACATGCAAGTCGAACGCACTCTTCGGAGTGAGTGGCGCACGGGTGAGTAACGCGTGGGAACCTGCCCTGGGGTTGGGAATAACCGCTGGAAACGGCGGCTAATACCCGATACGCCTTTCGAGGGAAAGATTTATCGCCCCGGGATGGGCCCGCGTCCGATTAGCTTGTTGGTGGGGTAATGGCCCACCAAGGCATCGATCGGTAGCTGGTCTGAGAGGATGATCAGCCACACTGGGACTGAGACACGGCCCAGACTCCTACGGGAGGCAGCAGTGGGGAATCTTGGACAATGGGGGAAACCCTGATCCAGCCATGCCGCGTGGGTGAAGAAGGCCTTAGGGTTGTAAAGCCCTTTCAGTCGTGACGATGATGACG…	0	0	0	0	0.0510551	0	0	0	0	0	0	0	0	Bacteria	Proteobacteria	Alphaproteobacteria	Rhodospirillales	Rhodospirillaceae	Fodinicurvata
OTU_8846	ACGAACGCTGGCGGCAGGCTTAACACATGCAAGTCGAACGGTCTCTTCGGAGGCAGTGGCAGACGGGTGAGTAACGCGTGGGAATATACCTATTGGTAAGGAACAACAGTTGGAAACGACTGCTAATACCTTATACGCCCTTCGGGGGAAAGATTTATCGCCAATAGATTAGCCCGCGTTAGATTAGCTAGTTGGTGAGGTAATGGCTCACCAAGGCGACGATCTATAGCTGGTCTGAGAGGATGATCAGCCACACTGGAACTGAGACACGGTCCAGACTCCTACGGGAGGCAGCAGTGGGGAATATTGGACAATGGGCGCAAGCCTGATCCAGCCATGCCGCGTGAGTGATGAAGGCCTTAGGGTTGTAAAGCTCTTTCAACGGTGAAGATAATGACG…	0	0.0123839	0	0	0.012934	0	0	0	0	0	0.0134561	0.00552147	0	Bacteria	Proteobacteria	Alphaproteobacteria	Rhizobiales	Phyllobacteriaceae	Ahrensia
OTU_8943	ATGAACGCTGACAGAATGCTTAACACATGCAAGTCGACTGGAATTCACTTCGGTGATAGTACGGTGGCGGACGGGTGAGTAACGCGTAAAGAACTTGCCCTCTAGACTGGGACAACTGTTGGAAACGACAGCTAATACCAGATATTATGAGAACCTCGCATGGGGAACTTATGAAAGCTATATGCGCTAGAGGAGAGCTTTGCGTGCCATTAGGTAGTTGGTAGGGTAATGGCCTACCAAGCCGACGATGGCTAGCCGGCCTGAGAGGGTGAACGGCCACAAGGGGACTGAGACACGGCCCTTACTCCTACGGGAGGCAGCAGTGGGGAATATTGGACAATGGACCAAAAGTCTGATCCAGCAATTCTGTGTGCACGATGAAGGTTTTCGGATCGTAAA…	0.00981461	0	0	0	0	0	0.0160128	0.0198845	0	0.00457457	0	0	0	Bacteria	Fusobacteria	Fusobacteriia	Fusobacteriales	Fusobacteriaceae	Propionigenium
OTU_9020	ACGAACGCTGGCGGCAGGCTTAACACATGCAAGTCGAGCGCCACCTTCGGGTGGAGCGGCGGACGGGTGAGTAACGCGTGGGAACGTGCCCTTTACTACGGAATAGCCATTGGAAACGATGATTAATACCGTATGTGCCCTTCGGGGGAAAGATTTATCGGTAAAGGATCGGCCCGCGTTAGATTAGGTAGTTGGTGGGGTAATGGCCTACCAAGCCGACGATCTATAGCTGGTTTGAGAGGATGATCAGCCACACTGGGACTGAGACACGGCCCAGACTCCTACGGGAGGCAGCAGTGGGGAATCTTAGACAATGGGGGCAACCCTGATCTAGCCATGCCGCGTGTGTGATGAAGGCCCTAGGGTCGTAAAGCACTTTCGCCTGTGAAGATAATGACG…	0	0	0.00790514	0.00293994	0	0.0108181	0.00720576	0	0.00446927	0.0032022	0.00283286	0.00552147	0.00961538	Bacteria	Proteobacteria	Alphaproteobacteria	Rhodobacterales	Rhodobacteraceae	NA
OTU_7724	ACGAACGCTGGCGGCACGCCTAACACATGCAAGTCGAGCGCACCTTCGGGTGAGCGGCGGACGGGTTAGTAACGCGTGGGAACATACCCAACACTACGGAATAGCCTTTGGAAACGAAGAGTAATACCGTATACGCCCTTCGGGGGAAAGATTTATCGGTGATGGATTGGCCCGCGTTAGATTAGATAGTTGGTGGGGTAACGGCCTACCAAGTCTACGATCTATAGCTGGTTTGAGAGGATGATCAGCAACACTGGGACTGAGACACGGCCCAGACTCCTACGGGAGGCAGCAGTGGGGAATCTTAGACAATGGGCGAAAGCCTGATCTAGCGATGCCGCGTGAGTGACGAAGGCCTTAGGGTCGTAAAGCTCTTTCGCCAGGGATGATAATGACAGT…	0	0	0	0	0.0176991	0	0.0168135	0.0128287	0	0	0	0	0	Bacteria	Proteobacteria	Alphaproteobacteria	Rhodobacterales	Rhodobacteraceae	Loktanella
OTU_10021	ATGAACGCTAGTAGTATGCTTGACACATGCAAGTCGAACGGAATTTTTCGTGGCGAACGGGTGAGGAATACACAGAATGCTACCTTTTAATTTAGAACAACAAATGTTTATAAAACATTTTAAATACTAGATAATAAATAAAGGTTTTTGTTTTAATACATAACTCCGTTAAAAGATGGGTCTGTGAAAGATTAGGTAGTTGGTAATTTTAACAGCTTACCAAGCCTTCGATCTTTAGTTGGTCTTAGAGGATGATCAACCACACTGGAACTGAAATAAGGTCCAGGCTGAATTTTCGGCCAGCAGTGAGGAATATTGGACAATGAACGAAAGTTTGATCCAGCAATACTATCTGAATGAAGACGGCTTTTTTTAGTTGTAAAGTTCTTTCGTTAAGAA…	0	0	0.0503953	0.00335993	0	0	0	0	0	0	0	0	0	Bacteria	Proteobacteria	Alphaproteobacteria	Rickettsiales	Mitochondria	NA
OTU_10132	ACGAACGCTGGCGGCAGGCCTAACACATGCAAGTCGAGCGATCCCTTCGGGGATAGCGGCGGACGGGTGAGTAACGCGTGGGAACGTGCCCTTTGCTACGGAACAACAGCTGGAAACGGCTGCTAATACCGTATGTGCCCTTCGGGGGAAAGATTTATCGGCAAAGGATCGGCCCGCGTTGGATTAGGTAGTTGGTGGGGTAACGGCCCACCAAGCCGACGATCCATAGCTGGTTTGAGAGGATGATCAGCCACACTGGGACTGAGACACGGCCCAGACTCCTACGGGAGGCAGCAGTGGGGAATCTTAGACAATGGGGGCAACCCTGATCTAGCCATGCCGCGTGAACGATGAAGGCCTTAGGGTTGTAAAGTTCTTTCAGCTGGGACGATAATGACG…	0	0	0.0128458	0.00629987	0	0	0.0128102	0	0.00223464	0.00182983	0	0.00490798	0	Bacteria	Proteobacteria	Alphaproteobacteria	Rhodobacterales	Rhodobacteraceae	Paenirhodobacter
OTU_3186	ACGAACGCTGGCGGCAGGCCTAACACATGCAAGTCGAGCGCGTCTTTCGGGACGAGCGGCGGACGGGTGCGTAACGCGTGGGAAGATGCCTTGGGGTGCGGGACAACCATTGGAAACGATGGCTAATACCGCATAATGTCTACGGACCAAAGATTTATCGCCCTGAGATTTGCCCGCGTTAGATTAGCTAGTTGGTGAGGTAATGGCTCACCAAGGCGACGATCTATAGCTGGTTTGAGAGGATGATCAGCCACACTGGGACTGAGACACGGCCCAGACTCCTACGGGAGGCAGCAGTGGGGAATCTTGGACAATGGGGGCAACCCTGATCCAGCCATGCCGCGTGAGTGATGAAGGCCTTAGGGTTGTAAAACTCTTTCGACGGGGACGATAATGACG…	0	0	0	0	0	0	0	0.0346376	0	0	0	0	0	Bacteria	Proteobacteria	Alphaproteobacteria	NA	NA	NA
OTU_11430	ACGAACGCTGGCGGCAGGCCTAACACATGCAAGTCGAGCGCACTCTTCGGAGTGAGCGGCGGACGGGTTAGTAACGCGTGGGAACATACCCTTCTCTACGGAATAGCCTCGGGAAACTGAGAGTAATACCGTATACGCCCTTCGGGGGAAAGATTTATCGGAGATGGATTGGCCCGCGTTAGATTAGATAGTTGGTGGGGTAATGGCCTACCAAGTCTACGATCTATAGCTGGTTTGAGAGGATGATCAGCAACACTGGGACTGAGACACGGCCCAGACTCCTACGGGAGGCAGCAGTGGGGAATCTTAGACAATGGGCGCAAGCCTGATCTAGCGATGCCGCGTGAGTGACGAAGGTCTTAGGATCGTAAAGCTCTTTCGCCAGGGATGATAATGACA…	0.00327154	0.00309598	0	0.00167997	0	0.00608519	0.000800641	0.00256575	0.00558659	0.00137237	0	0.00858896	0	Bacteria	Proteobacteria	Alphaproteobacteria	Rhodobacterales	Rhodobacteraceae	Loktanella
OTU_11431	ACGAACGCTGGCGGCAGGCCTAACACATGCAAGTCGAGCGCCCCTTCGGGGGAGCGGCGGACGGGTGAGTAACGCGTGGGAATATGCCCAAAGGTAGGGAATAGCCTCTGGAAACGGAGAGTAATACCCTATGTGCCCTTCGGGGGAAAGATTTATCGCCTTTGGATTAGCCCGCGTTGGATTAGGTAGTTGGTGGGGTAATGGCCCACCAAGCCTACGATCCATAGCTGGTTTGAGAGGATGATCAGCCACACTGGGACTGAGACACGGCCCAGACTCCTACGGGAGGCAGCAGTGGGGAATCTTAGACAATGGGGGAAACCCTGATCTAGCCATGCCGCGTGAGTGATGAAGGCCTTAGGGTCGTAAAGCTCTTTCGCCAGGGATGATAATGACAGT…	0	0	0	0.00881982	0	0	0.0104083	0	0	0.00686185	0	0	0	Bacteria	Proteobacteria	Alphaproteobacteria	Rhodobacterales	Rhodobacteraceae	Pseudoruegeria
OTU_8658	ACGAACGCTGGCGGCAGGCCTAACACATGCAAGTCGAGCGCACCCTTCGGGGCGAGCGGCGGACGGGTTAGTAACGCGTGGGAACGTACCCTTGTCTACGGAATAGCCTTTGGAAACGAAGAGTAATACCGTATACGCCCTTCGGGGGAAAGATTTATCGGACAAGGATCGGCCCGCGTTAGATTAGATAGTTGGTGGGGTAACGGCCTACCAAGTCTACGATCTATAGCTGGTTTTAGAGGATGATCAGCAACACTGGGACTGAGACACGGCCCAGACTCCTACGGGAGGCAGCAGTGGGGAATCTTAGACAATGGGCGAAAGCCTGATCTAGCCATGCCGCGTGAGTGATGAAGGCCCTAGGGTCGTAAAGCTCTTTCGCCAGGGATGATAATGACA…	0.0338059	0.00877193	0	0	0	0	0	0	0	0	0	0	0	Bacteria	Proteobacteria	Alphaproteobacteria	Rhodobacterales	Rhodobacteraceae	NA
OTU_11593	ACGAACGCTGGCGGCACGCCTAACACATGCAAGTCGAGCGCACCTTCGGGTGAGCGGCGGACGGGTTAGTAACGCGTGGGAACATACCCAACTCTAAGGAATAGCCTCGGGAAACTGAGAGTAATACCTTATACGCCCTTCGGGGGAAAGATTTATCGGAGATGGATTGGCCCGCGTTAGATTAGATAGTTGGTGGGGTAATGGCCTACCAAGTCTACGATCTATAGCTGGTTTGAGAGGATGATCAGCAACACTGGGACTGAGACACGGCCCAGACTCCTACGGGAGGCAGCAGTGGGGAATCTTAGACAATGGGCGCAAGCCTGATCTAGCGATGCCGCGTGAGTGACGAAGGTCTTAGGATCGTAAAGCTCTTTCGCCAGGGATGATAATGACAGT…	0	0	0	0	0	0	0	0	0	0.0219579	0	0	0	Bacteria	Proteobacteria	Alphaproteobacteria	Rhodobacterales	Rhodobacteraceae	Roseobacter
OTU_11748	ACGAACGCTGGCGGCAGGCCTAACACATGCAAGTCGAGCGCACCTTCGGGTGAGCGGCGGACGGGTGAGTAACGCGTGGGAATATACCCTTCTCTGCGGAATAGCCTCTGGAAACGGAGAGTAATACCGCATACGCCCTTCGGGGGAAAGATTTATCGGAGAAGGATTAGCCCGCGTTAGATTAGATAGTTGGTGGGGTAACGGCCTACCAAGTCTACGATCTATAGCTGGTTTTAGAGGACGATCAGCCACACTGGGACTGAGACACGGCCCAGACTCCTACGGGAGGCAGCAGTGGGGAATCTTAGACAATGGGCGAAAGCCTGATCTAGCCATGCCGCGTGAGTGATGAAGGCCTTAGGGTCGTAAAGCTCTTTCGCCAGGGATGATAATGACAGT…	0	0	0	0	0.0319946	0	0	0	0	0	0	0	0	Bacteria	Proteobacteria	Alphaproteobacteria	Rhodobacterales	Rhodobacteraceae	Roseobacter
OTU_1490	ACGAACGCTGGCGGCAGGCTTAACACATGCAAGTCGAACGCCCTCTTCGGAGGGAGTGGCAGACGGGTGAGTAACGCGTGGGGAACTACCTATCAGTACGGAACAACAGTTAGAAATGACTGCTAATACCGTATACGTCCTTAGGGAGAAAGATTTATCGCTGATAGATGTACCCGCGTTAGATTAGCTAGTTGGTGAGGTAATGGCTCACCAAGGCGACGATCTATAGCTGGTCTGAGAGGATGATCAGCCACACTGGGACTGAGACACGGCCCAGACTCCTACGGGAGGCAGCAGTGGGGAATATTGGACAATGGGCGAAAGCCTGATCCAGCCATGCCGCGTGTGTGATGAAGGCCCTAGGGTTGTAAAGCACTTTCAATGGTGAAGATAATGACG…	0	0	0	0	0	0	0	0	0.0268156	0	0	0.0134969	0	Bacteria	Proteobacteria	Alphaproteobacteria	Rhodobacterales	Rhodobacteraceae	Loktanella
OTU_11922	ACGAACGCTGGCGGCAGGCCTAACACATGCAAGTCGAGCGCACTCTTCGGAGTGAGCGGCGGACGGGTTAGTAACGCGTGGGAATATACCCTTCACTACGGAATAGCCTCGGGAAACTGAGAGTAATACCGTATACGCCCTTCGGGGGAAAGATTTATCGGTGATGGATTAGCCCGCGTTAGATTAGATAGTTGGTGGGGTAATGGCCTACCAAGTCTACGATCTATAGCTGGTTTGAGAGGATGATCAGCAACACTGGGACTGAGACACGGCCCAGACTCCTACGGGAGGCAGCAGTGGGGAATCTTAGACAATGGGCGAAAGCCTGATCTAGCCATGCCGCGTGAGTGACGAAGGCCTTAGGGTCGTAAAGCTCTTTCGCCAGGGATGATAATGACA…	0.0119956	0	0	0	0	0	0	0	0	0.010064	0.0092068	0	0	Bacteria	Proteobacteria	Alphaproteobacteria	Rhizobiales	Phyllobacteriaceae	NA
OTU_12101	ACGAACGCTGGCGGCAGGCTTAACACATGCAAGTCGAACGGTCTCTTCGGAGGCAGTGGCAGACGGGTGAGTAACGCGTGGGAACCTACCTATTTCTACGGAACAACAGTTGGAAACGACTGCTAATACCGTATACGCCCTTCGGGGGAAAGATTTATCGGAAATAGATGGGCCCGCGTTAGATTAGCTAGTTGGTGAGGTAATGGCTCACCAAGGCGACGATCTATAGCTGGTCTGAGAGGATGATCAGCCACACTGGGACTGAGACACGGCCCAGACTCCTACGGGAGGCAGCAGTGGGGAATATTGGACAATGGGCGCAAGCCTGATCCAGCCATGCCGCGTGAGTGATGAAGGCCTTAGGGTTGTAAAGCTCTTTCAACGGTGAAGATAATGACG…	0	0	0	0	0	0	0	0	0	0	0	0.0276074	0	Bacteria	Proteobacteria	Alphaproteobacteria	Rhizobiales	Phyllobacteriaceae	Ahrensia
OTU_12277	ACGAACGCTGGCGGCAGGCTTAACACATGCAAGTCGAGCGCCCTTTTCGGAGGGAGCGGCGGACGGGTGAGTAACGCGTGGGAACGTGCCCTTTTCTGCGGAATAATCATTGGAAACGATGACTAATACCGCATACGCCCTATTGGGGAAAGATTTATCGGAGAAGGATCGGCCCGCGTTGGATTAGGTAGTTGGTGGGGTAAAGGCCTACCAAGCCGACGATCCATAGCTGGTTTGAGAGGATGATCAGCCACACTGGGACTGAGACACGGCCCAGACTCCTACGGGAGGCAGCAGTGGGGAATCTTAGACAATGGGGGCAACCCTGATCTAGCCATGCCGCGTGGACGAAGAAGGCCTTAGGGTTGTAAAGTCCTTTCGCTAGGGAAGATAATGACG…	0	0	0	0	0	0	0	0	0	0.0201281	0	0	0	Bacteria	Proteobacteria	Alphaproteobacteria	Rhodobacterales	Rhodobacteraceae	NA
OTU_13510	ACGAACGCTGGCGGCAGGCCTAACACATGCAAGTCGAACGCTCTCTTCGGAGGGAGTGGCGGACGGGTGAGTATCGCGTGGGAACCTAGCCTTTGGTACGGAACAACCGCGGGAAACTGCGGCTAATACCGTATATACCCTCCGGGGGAAAGATTCATCGCCAAGGGATGGGCCCGCGTCTGATTAGCTAGTTGGTGAGGTAACGGCTCACCAAGGCATCGATCAGTAGCTGGTCTGAGAGGATGATCAGCCACACTGGGACTGAGACACGGCCCAGACTCCTACGGGAGGCAGCAGTGGGGAATATTGGACAATGGGCGCAAGCCTGATCCAGCCATGCCGCGTGAGTGAAGAAGGCCTTAGGGTTGTAAAGCTCTTTCAACGGTGAAGATGATGACA…	0	0	0	0	0.0258679	0	0	0	0	0	0	0	0	Bacteria	Proteobacteria	Alphaproteobacteria	Rhodospirillales	Rhodospirillaceae	NA
OTU_13511	ACGAACGCTGGCGGCACGCCTAACACATGCAAGTCGAGCGCTACCTTCGGGTGGAGCGGCGGACGGGTTAGTAACGCGTGGGAACATACCCTTTTCTACGGAATAGCCTCGGGAAACTGAGAGTAATACCGTATACGCCCTTCGGGGGAAAGATTTATCGGTGAAGGATTGGCCCGCGTTAGATTAGATAGTTGGTGGGGTAATGGCCTACCAAGTCTACGATCTATAGCTGGTTTGAGAGGATGATCAGCAACACTGGGACTGAGACACGGCCCAGACTCCTACGGGAGGCAGCAGTGGGGAATCTTAGACAATGGGCGCAAGCCTGATCTAGCGATGCCGCGTGAGTGACGAAGGTCTTAGGATCGTAAAGCTCTTTCGCCAGGGATGATAATGACA…	0	0	0	0	0	0	0	0.00898012	0	0.010979	0	0	0	Bacteria	Proteobacteria	Alphaproteobacteria	Rhodobacterales	Rhodobacteraceae	Loktanella
OTU_13723	TTGAACGCTGGCGGCACGCTTTACACATGCAAGTCGAGCGGCAGCGCGGGGTTTCGGCCCTGGCGGCGAGCGGCGGACGGGTGAGTAACGCATGGGAACGTGTCCGAAGGTGCGGAACAGCCCTGGGAAACCAGGATTAATGCCGCATGATCTCTACGGAGCAAAGCGGGGGACCGGCTTGCCGGCCTCGCGCCTTCGGAGCGGCCCATGTCCGATTAGGTTGTTGGCGGGGTAACGGCCCACCAAGCCTGCGATCGGTAGCTGGTCTGAGAGGATGATCAGCCACACCGGGACTGAGACACGGCCCGGACTCCTACGGGAGGCAGCAGTGGGGAATTTTCCGCAATGGGCGCAAGCCTGACGGAGCAATACCGCGTGAGGGAAGAATGCCTGAGGGTT…	0	0	0	0	0	0	0	0	0	0.0169259	0	0	0	Bacteria	NA	NA	NA	NA	NA
OTU_13942	ACGAACGCTGGCGGCAGGCTTAACACATGCAAGTCGAACGCCCTCTTCGGAGGGAGTGGCAGACGGGTGAGTAACGCGTGGGAACCTACCTAATAGTAAGGAACAACAGTTGGAAACGACTGCTAATACCTTATACGCCCTTCGGGGGAAAGATTTATCGCTATTAGATGGGCCCGCGTTAGATTAGCTAGTTGGTGAGGTAATGGCTCACCAAGGCGACGATCTATAGCTGGTCTGAGAGGATGATCAGCCACACTGGAACTGAGACACGGTCCAGACTCCTACGGGAGGCAGCAGTGGGGAATATTGGACAATGGGCGAAAGCCTGATCCAGCCATGCCGCGTGAGTGATGAAGGCCCTAGGGTTGTAAAGCTCTTTCAACGGTGAAGATAATGACG…	0	0.00825593	0	0	0.0136147	0	0	0	0	0	0	0	0	Bacteria	Proteobacteria	Alphaproteobacteria	Rhizobiales	Phyllobacteriaceae	Pseudahrensia
OTU_13943	ACGAACGCTGGCGGCACGCCTAACACATGCAAGTCGAGCGCACCTTCGGGTGAGCGGCGGACGGGTTAGTAACGCGTGGGAACATACCCTTCTCTAAGGAATAGCCACTGGAAACGGTGAGTAATACCTTATACGCCCTTCGGGGGAAAGATTTATCGGAGATGGATTGGCCCGCGTTAGATTAGATAGTTGGTGGGGTAACGGCCTACCAAGTCTACGATCTATAGCTGGTTTTAGAGGATGATCAGCAACACTGGGACTGAGACACGGCCCAGACTCCTACGGGAGGCAGCAGTGGGGAATCTTAGACAATGGGCGAAAGCCTGATCTAGCGATGCCGCGTGAGTGATGAAGGCCTTAGGGTCGTAAAGCTCTTTCGCCAGGGATGATAATGACAGT…	0	0	0	0.00377992	0	0	0	0	0	0	0	0.0165644	0	Bacteria	Proteobacteria	Alphaproteobacteria	Rhodobacterales	Rhodobacteraceae	NA
OTU_13944	ACGAACGCTGGCGGCAGGCCTAACACATGCAAGTCGAGCGAGCAGTCACCTTCGGGTGGTGGGCGAGCGGCGAACGGGTGAGTAACGCGTGGGAACCTGCCCTTCGGTACGGGACAACCTCGGGAAACTGGGGCTAATACCGTATGATCTCTACGGAGCAAAGATTTATCGCCGAAGGATGGTCCCGCGTCCGATTAGGTTGTTGGTGTGGTAACGGCGCACCAAGCCTACGATCGGTAGCTGGTCTGAGAGGATGATCAGCCACACTGGGACTGAGACACGGCCCAGACTCCTACGGGAGGCAGCAGTGGGGAATATTGGACAATGGGGGCAACCCTGATCCAGCCATGCCGCGTGCGTGAAGAAGGCCTTAGGGTTGTAAAGCGCTTTCAGCGGGGA…	0	0	0	0	0.0115725	0	0	0	0	0	0.0134561	0	0	Bacteria	Proteobacteria	Alphaproteobacteria	Rhodospirillales	Rhodospirillaceae	NA
OTU_14435	ACGAACGCTGGCGGCAGGCCTAACACATGCAAGTCGAACGAGCTCTTCGGAGTTAGTGGCGGACGGGTTAGTAACGCGTGGGAATATGCCCCTGGGTAAGGAGCAACAGCTGGAAACGGCTGCTAATACCTTATGATGTCTACGGACCAAAGATTTATCGCCCAGGGATTAGCCCGCGTTGGATTAGGTAGTTGGAGGGGTAACGGCCCACCAAGCCTACGATCCATAGCTGGTTTGAGAGGATGATCAGCAACACTGGGACTGAGACACGGCCCAGACTCCTACGGGAGGCAGCAGTGGGGAATCTTAGACAATGGGGGAAACCCTGATCTAGCCATGCCGCGTGATCGATGACGGCCTTAGGGTTGTAAAGATCTTTCGACGGGGACGATAATGACG…	0.0370774	0	0	0	0	0	0	0	0	0	0	0	0	Bacteria	Proteobacteria	Alphaproteobacteria	Rhodobacterales	Rhodobacteraceae	NA
OTU_541	ACGAACGCTGGCGGCAGGCCTAACACATGCAAGTCGAGCGCACCTTCGGGTGAGCGGCGGACGGGTTAGTAACGCGTGGGAATATACCCTTCACTACGGAATAGCCTCGGGAAACTGAGAGTAATACCGTATACGCCCTTCGGGGGAAAGATTTATCGGTGATGGATTAGCCCGCGTCTGATTAGATAGTTGGTGGGGTAACGGCCTACCAAGTCTACGATCAGTAGCTGGTTTGAGAGGATGATCAGCAACACTGGGACTGAGACACGGCCCAGACTCCTACGGGAGGCAGCAGTGGGGAATCTTAGACAATGGGCGCAAGCCTGATCTAGCCATGCCGCGTGAGTGACGAAGGCCTTAGGGTCGTAAAGCTCTTTCGCCAGAGATGATAATGACAGT…	0	0	0	0	0.0224643	0	0	0	0	0	0	0	0	Bacteria	Proteobacteria	Alphaproteobacteria	Rhodospirillales	Rhodospirillaceae	Tistlia
OTU_14693	ACGAACGCTGGCGGCAGGCCTAACACATGCAAGTCGAACGCTCTCTTCGGAGGGAGTGGCAGACGGGTGAGTAACGCGTGGGAACCTACCTAGTGGTACGGAATAACTCAGGGAAACTTGAGCTAATACCGTATACGCCCTTCGGGGGAAAGATTTATCGCCATTAGATGGGCCCGCGTTGGATTAGCTTGTTGGTGAGGTAAAGGCTCACCAAGGCGACGATCCATAGCTGGTCTGAGAGGATGATCAGCCACACTGGGACTGAGACACGGCCCAGACTCCTACGGGAGGCAGCAGTGGGGAATATTGGACAATGGGCGCAAGCCTGATCCAGCCATGCCGCGTGAGTGACGAAGGCCTTAGGGTTGTAAAGCTCTTTTAGCAGGGACGATAATGACG…	0	0	0.0326087	0	0	0	0	0	0	0	0	0	0	Bacteria	Proteobacteria	Alphaproteobacteria	Rhodobacterales	Rhodobacteraceae	Loktanella
OTU_14694	ACGAACGCTGGCGGCAGGCCTAACACATGCAAGTCGAACGATGAGGCCCCTTCGGGGGTACATCAGTGGCGCACGGGTGAGTAACGCGTGGGAACCTGCCCTGAGGTACGGAATAACTACGGGAAACTGTAGCTAATACCGTATACGCCCTACGGGGGAAAGATTTATCGCCTTAGGATGGTCCCGCGTCGGATTAGGTTGTTGGTGGGGTAACGGCCTACCAAGCCTACGATCCGTAGCTGGTCTGAGAGGATGATCAGCCACACTGGGACTGAGACACGGCCCAGACTCCTACGGGAGGCAGCAGTGGGGAATATTGGACAATGGGGGCAACCCTGATCCAGCCATGCCGCGTGCGTGAAGAAGGCCTTAGGGTTGTAAAGCGCTTTCAGCGGGGAC…	0	0	0	0	0	0	0	0	0	0.0105215	0.00708215	0	0	Bacteria	Proteobacteria	Alphaproteobacteria	Rhizobiales	Hyphomicrobiaceae	Filomicrobium
OTU_15217	ACGAACGCTGGCGGCAGGCTTAACACATGCAAGTCGAACGGTCTCTTCGGAGGCAGTGGCAGACGGGTGAGTAACGCGTGGGAATATACCTATTGGTAAGGAACAACAGTTGGAAACGACTGCTAATACCTTATACGCCCTTTTGGGGAAAGATTTATCGCCAATAGATTAGCCCGCGTTAGATTAGCTAGTTGGTGAGGTAATGGCTCACCAAGGCGACGATCTATAGCTGGTCTGAGAGGATGATCAGCCACACTGGAACTGAGACACGGTCCAGACTCCTACGGGAGGCAGCAGTGGGGAATATTGGACAATGGGCGCAAGCCTGATCCAGCCATGCCGCGTGAGTGATGAAGGCCTTAGGGTTGTAAAGCTCTTTCAACGGTGAAGATAATGACG…	0	0	0.0118577	0	0	0	0	0.0121873	0	0	0	0	0	Bacteria	Proteobacteria	Alphaproteobacteria	Rhizobiales	Phyllobacteriaceae	Ahrensia
OTU_16205	ACGAACGCTGGCGGCAGGCCTAACACATGCAAGTCGAGCGATCCTTTCGGGGATAGCGGCGGACGGGTGAGTAACGCGTGGGAACGTGCCCTTTGCTACGGAACAACAGCTGGAAACGGCTGCTAATACCGTATGTGCCCTTCGGGGGAAAGATTTATCGGCAAAGGATCGGCCCGCGTTGGATTAGGTAGTTGGTGGGGTAACGGCCCACCAAGCCGACGATCCATAGCTGGTTTGAGAGGATGATCAGCCACACTGGGACTGAGACACGGCCCAGACTCCTACGGGAGGCAGCAGTGGGGAATCTTGGACAATGGGGGCAACCCTGATCCAGCCATGCCGCGTGAACGATGAAGGCCTTAGGGTTGTAAAGTTCTTTCAGCTGGGAAGATAATGACG…	0	0	0	0	0	0	0	0.0179602	0	0	0	0	0	Bacteria	Proteobacteria	Alphaproteobacteria	Rhodobacterales	Rhodobacteraceae	NA
OTU_16206	ACGAACGCTGGCGGCATGCTTTACACATGCAAGTCGAACGAGATCTTCGGATCTAGTGGCGCACGGGTGAGTAACGCGTGGAAACCTACCATTCTGTACGGAATAACGATTGGAAACGATCGCTAATACCGTATACGCCCTGTGGGGGAAAGGTCCGCCGCAGAATGAGGGGTCCGCGTCCGATTAGCTTGTTGGTAAGGTAATGGCTTACCAAGGCGACGATCGGTAGCTGGTCTGAGAGGATGATCAGCCACACTGGGACTGAGACACGGCCCAGACTCCTACGGGAGGCAGCAGTGGGGAATATTGGACAATGGGGGCAACCCTGATCCAGCAATGCCGCGTGTGTGAAGAAGGCCTTAGGGTTGTAAAACACTTTCAATAGTGAAGATGATGACG…	0	0	0	0	0	0	0	0.0179602	0	0	0	0	0	Bacteria	Proteobacteria	Alphaproteobacteria	Rickettsiales	SAR116_clade	NA
OTU_16525	ACGAACGCTGGCGGCAGGCCTAACACATGCAAGTCGAGCGCTCACTTCGGTGGGAGCGGCGGACGGGTTAGTAACGCGTGGGAATATACCCAAAGGTACGGAATAGCCACTGGAAACGGTGAGTAATACCGTATGTGCCCTTCGGGGGAAAGATTTATCGCCTTTGGATTAGCCCGCGTTAGATTAGATAGTTGGTGGGGTAATGGCCTACCAAGTCTACGATCTATAGCTGGTTTGAGAGGATGATCAGCAACACTGGGACTGAGACACGGCCCAGACTCCTACGGGAGGCAGCAGTGGGGAATCTTGGACAATGGGCGCAAGCCTGATCCAGCCATGCCGCGTGAGTGACGAAGGCCTTAGGGTCGTAAAGCTCTTTCGCCTGTGAAGATAATGACG…	0.0087241	0	0	0	0.00612662	0	0	0	0.0111732	0	0	0	0	Bacteria	Proteobacteria	Alphaproteobacteria	Rhodobacterales	Rhodobacteraceae	Pseudoruegeria
OTU_16526	ACGAACGCTGGCGGCAGGCTTAACACATGCAAGTCGAACGATCCTTCGGGATAGTGGCAGACGGGTGAGTAACGCGTGGGAACCTACCTTATTCTACGGAATAACACAGAGAAATTTGTGCTAATACCGTATACGCCCTTCGGGGGAAAGATTTATCGGAGTAGGATGGGCCCGCGTTGGATTAGCTAGTTGGTGGGGTAATGGCCTACCAAGGCGACGATCTATAGCTGGTCTGAGAGGATGATCAGCCACACTGGAACTGAGACACGGTCCAGACTCCTACGGGAGGCAGCAGTGGGGAATATTGGACAATGGGGGCAACCCTGATCCAGCCATGCCGCGTGAGTGATGAAGGCCCTAGGGTTGTAAAGCTCTTTCAACGGTGAAGATAATGACGGT…	0	0	0	0	0.0183799	0	0	0	0	0	0	0	0	Bacteria	Proteobacteria	Alphaproteobacteria	Rhizobiales	Phyllobacteriaceae	Hoeflea
OTU_16527	ACGAACGCTGGCGGCAGGCCTAACACATGCAAGTCGAACGAACTCTTCGGAGTTAGTGGCGCACGGGTGAGTAACGCGTGGGAATTTGCCTTCAGGTAAGGAACAACCACTGGAAACGGTGGCTAATACCTTATGATGTCTCTGAGATTTCTTGGGGACCAAAGATTTATCGCCTGAAGATGAGCCCGCGTTGGATTAGGTAGTTGGTGGGGTAACGGCCTACCAAGCCTACGATCCATAGCTGGTCTGAGAGGATGATCAGCCACACTGGGACTGAGACACGGCCCAGACTCCTACGGGAGGCAGCAGTGGGGAATATTGGACAATGGGGGCAACCCTGATCCAGCCATGCCGCGTGAGTGATGAAGGCCTTAGGGTTGTAAAACTCTTTCAGTGGTG…	0	0	0	0	0	0.0182556	0	0	0	0	0	0	0	Bacteria	Proteobacteria	Alphaproteobacteria	NA	NA	NA
OTU_17239	ACGAACGCTGGCGGCAGGCTTAACACATGCAAGTCGAACGGTCTCTTCGGAGGCAGTGGCAGACGGGTGAGTAACGCGTGGGAATATACCTATTGGTAAGGAACAACAGTTGGAAACGACTGCTAATACCTTATACGCCCTTTTGGGGAAAGATTTATCGCCAATAGATTAGCCCGCGTTAGATTAGCTAGTTGGTGAGGTAATGGCTCACCAAGGCGACGATCTATAGCTGGTCTGAGAGGATGATCAGCCACACTGGAACTGAGACACGGTCCAGACTCCTACGGGAGGCAGCAGTGGGGAATATTGGACAATGGGCGCAAGCCTGATCCAGCCATGCCGCGTGAGTGATGAAGGCCCTAGGGTTGTAAAGCTCTTTCAACGGTGAAGATAATGACG…	0.00981461	0	0	0	0	0.0108181	0	0	0	0	0	0	0	Bacteria	Proteobacteria	Alphaproteobacteria	Rhizobiales	Phyllobacteriaceae	Ahrensia
OTU_17240	ACGAACGCTGGCGGCAGGCTTAACACATGCAAGTCGAACGCGTCCTTCGGGACGAGTGGCAGACGGGTGAGTAACGCGTGGGAACGTGCCCTTCGGTACGGAATAGCCCCGGGAAACTGGGTGTAATACCGTATACGACCTTCGGGTGAAAGATTTATCGCCGAAGGATCGGCCCGCGTTAGATTAGCTAGATGGTGGGGTAAAAGCCTACCATGGCGACGATCTATAGCTGTTCTGAGAGGAAGATCAGCCACACTGGGACTGAGACACGGCCCAGACTCCTACGGGAGGCAGCAGTGGGGAATATTGGACAATGGGCGCAAGCCTGATCCAGCCATGCCGCGTGGATGAAGAAGGCCCTAGGGTTGTAAAGTCCTTTCGATGGTGAAGATAATGACG…	0	0	0	0	0	0	0	0	0	0.0114364	0	0	0	Bacteria	Proteobacteria	Alphaproteobacteria	Parvularculales	Parvularculaceae	NA
OTU_17586	ACGAACGCTGGCGGCAGGCTTAACACATGCAAGTCGAACGCTCCCTTCGGGGAGAGTGGCAGACGGGTGAGTAACGCGTGGGGATATACCTATCGGTAGGGAACAACAGTTGGAAACGACTGCTAATACCTTATACGTCCTTCGGGAGAAAGATTTATCGCCGATAGATTAACCCGCGTTAGATTAGCTAGTTGGTAGGGTAATGGCCTACCAAGGCGACGATCTATAGCTGGTCTGAGAGGATGATCAGCCACACTGGAACTGAGACACGGTCCAGACTCCTACGGGAGGCAGCAGTGGGGAATATTGGACAATGGGGGCAACCCTGATCCAGCCATGCCGCGTGAGTGATGAAGGCCCTAGGGTTGTAAAGCTCTTTCAACGGTGAAGATAATGACG…	0	0.00412797	0	0.00335993	0	0	0	0.00513149	0	0	0	0	0	Bacteria	Proteobacteria	Alphaproteobacteria	Rhizobiales	Phyllobacteriaceae	NA
OTU_17587	ACGAACGCTGGCGGCAGGCCTAACACATGCAAGTCGAACGCTCTCTTCGGAGGGAGTGGCGGACGGGTGAGTATCGCGTGGGAACCTAGCCTTTGGTACGGAACAACCGCGGGAAACTGCGGCTAATACCGTATATACCCTCCGGGGGAAAGATTCATCGCCAAGGGATGGGCCCGCGTCTGATTAGCTAGTTGGTGAGGTAACGGCTCACCAAGGCATCGATCAGTAGCTGGTCTGAGAGGATGATCAGCCACACTGGGACTGAGACACGGCCCAGACTCCTACGGGAGGCAGCAGTGGGGAATATTGGACAATGGGGGCAACCCTGATCCAGCCATGCCGCGTGAGTGAAGAAGGCCTTAGGGTTGTAAAGCTCTTTCAACGGTGAAGATGATGACA…	0	0	0	0	0	0.0162272	0	0	0	0	0	0	0	Bacteria	Proteobacteria	Alphaproteobacteria	Rhodospirillales	Rhodospirillaceae	NA
OTU_132	GCGAACGCTGGCGGCAGGCTTAACACATGCAAGTCGAGCGGGCCCTTCGGGGTCAGCGGCGGACGGGTGAGTAACGCGTGGGAACGTGCCTTCTGGTTCGGAATAACCCTGGGAAACTAGGGCTAATACCGGATACGCCCTTTTGGGGAAAGGTTTACTGCCGGAAGATCGGCCCGCGTCTGATTAGCTAGTTGGTGGGGTAACGGCCTACCAAGGCGACGATCAGTAGCTGGTCTGAGAGGATGATCAGCCACACTGGGACTGAGACACGGCCCAGACTCCTACGGGAGGCAGCAGTGGGGAATATTGGACAATGGGCGCAAGCCTGATCCAGCCATGCCGCGTGAGTGATGAAGGCCTTAGGGTTGTAAAGCTCTTTTATCCGGGACGATAATGACG…	0	0	0	0	0	0	0	0.00898012	0	0	0	0.00552147	0	Bacteria	Proteobacteria	Alphaproteobacteria	Rhizobiales	Methylobacteriaceae	Methylobacterium
OTU_3226	ACGAACGCTGGCGGCAGGCTTAACACATGCAAGTCGAGCGCCCACTTCGGTGGGAGCGGCAGACGGGTGAGTAACGCGTGGGAATATACCTATCTCTAGGGAACAACAGTTGGAAACGACTGCTAATGCCTTATACGCCCTTCGGGGGAAAGATTTATCGGAGATAGATTAGCCCGCGTTAGATTAGCTAGTTGGTGAGGTAATGGCTCACCAAGGCGACGATCTATAGCTGGTCTGAGAGGATGATCAGCCACACTGGAACTGAGACACGGTCCAGACTCCTACGGGAGGCAGCAGTGGGGAATATTGGACAATGGGCGCAAGCCTGATCCAGCCATGCCGCGTGAGTGATGAAGGCCCTAGGGTTGTAAAGCTCTTTCAACGGTGAAGATAATGACG…	0	0	0	0.00923982	0	0	0	0	0	0	0	0	0	Bacteria	Proteobacteria	Alphaproteobacteria	Rhodobacterales	Rhodobacteraceae	NA
OTU_18447	ACGAACGCTGGCGGCAGGCCTAACACATGCAAGTCGAGCGCACCTTCGGGTGAGCGGCGGACGGGTTAGTAACGCGTGGGAATATGCCCAAATCTACGGAATAGCCTCGGGAAACTGAGAGTAATACCGTATACGCCCTACGGGGGAAAGATTTATCGGATTTGGATTAGCCCGCGTTGGATTAGGTAGTTGGTGGGGTAATGGCCCACCAAGCCGACGATCCATAGCTGGTTTGAGAGGATGATCAGCAACACTGGGACTGAGACACGGCCCAGACTCCTACGGGAGGCAGCAGTGGGGAATCTTAGACAATGGGGGAAACCCTGATCTAGCCATGCCGCGTGAGTGATGAAGGCCCTAGGGTCGTAAAGCTCTTTCGCCTGGGAAGATAATGACGGT…	0.0239913	0	0	0	0	0	0	0	0	0	0	0	0	Bacteria	Proteobacteria	Alphaproteobacteria	Rhizobiales	Phyllobacteriaceae	NA
OTU_18448	ATGAACGCTGGCGGTATGCCTAACACATGCAAGTTGAACGAAAGCTTATGCTTTAGTAGCGGACGGGTGAGTAACGCATGAGAATCTGCCTCTAGGAAAGGAATAACAATTGGAAACGACTGCTAATACCTTATATGCTATTTATAGTGAAAAGAGTAATCTGCCTAGAGATGAGCTCATGTCTGATTAGCTAGTTGGTAAGGTAAAGGCTTACCAAGGCAACGATCAGTAGCTGGTTTGAGAGGACGATCAGCCACACTGGGACTGAGATACGGCCCAGACTTCTACGGAAGGCAGCAGTGGGGAATCTTAGACAATGGGGGCAACCCTGATCTAGCCATGCCGCGTGTGTGATGAAGGCCCTAGGGTCGTAAAGCACTTTCGCCTGTGAAGATAATG…	0	0	0.0128458	0	0	0	0	0	0	0	0.00637394	0	0	Bacteria	Proteobacteria	Alphaproteobacteria	Rhodobacterales	Rhodobacteraceae	Boseongicola
OTU_18449	ACGAACGCTGGCGGCAGGCCTAACACATGCAAGTCGAGCGAAACCTTCGGGTTTAGCGGCGGACGGGTTAGTAACGCGTGGGAACGTGCCCTTTACTGCGGAATAGCCACTGGAAACGGTGAGTAATACCGCATACGCCCTTCGGGGGAAAGATTTATCGGTAAAGGATCGGCCCGCGTTAGATTAGGTAGTTGGTGGGGTAATGGCCTACCAAGCCTACGATCTATAGCTGGTTTGAGAGGATGATCAGCAACACTGGGACTGAGACACGGCCCAGACTCCTACGGGAGGCAGCAGTGGGGAATCTTCGGCAATGGGGGCAACCCTGACCGAGCCATGCCGCGTGAGTGATGAAGGCCTTAGGGTCGTAAAGCTCTTTCGCCAGAGATGATAATGACA…	0	0	0	0	0	0	0	0	0.024581	0	0	0	0	Bacteria	Proteobacteria	Alphaproteobacteria	Rhodobacterales	Rhodobacteraceae	NA
OTU_547	ACGAACGCTGGCGGCAGGCTTAACACATGCAAGTCGAACGAACTCTTCGGAGTGAGTGGCAGACGGGTGCGTAACACGTGGGAACCTACCTTAAGGTACGGAACAACACCGAGAAATTGGTGCTAATACCGTATGTGCCCTTCGGGGGAAAGATTTATCGCCTTAAGATGGGCCCGCGGCAGATTAGATAGTTGGTGGGGTAAAAGCCTACCAAGTCTACGATCTGTAGCTGGTCTGAGAGGATGATCAGCCACACTGGAACTGAGACACGGTCCAGACTCCTACGGGAGGCAGCAGTGGGGAATATTGGGCAATGGGCGAAAGCCTGACCCAGCCATGCCGCGTGAGTGATGAAGGCCTTAGGGTTGTAAAACTCTTTCGCCGGTGAAGATAATGACG…	0	0	0	0	0.0142954	0	0	0	0	0	0	0	0	Bacteria	Proteobacteria	Alphaproteobacteria	Rhizobiales	Bradyrhizobiaceae	Afipia
OTU_18899	ACGAACGCTGGCGGCACGCCTAACACATGCAAGTCGAGCGCACCTTCGGGTGAGCGGCGGACGGGTTAGTAACGCGTGGGAACGTACCCTTTTCTACGGAATAGCCTCGGGAAACTGAGAGTAATACCGTATACGCCCTTCGGGGGAAAGATTTATCGGAGAAGGATCGGCCCGCGTTAGATTAGTTAGTTGGTGGGGTAACGGCCTACCAAGACGACGATCTATAGCTGGTTTGAGAGGATGATCAGCAACACTGGGACTGAGACACGGCCCAGACTCCTACGGGAGGCAGCAGTGGGGAATCTTAGACAATGGGGGAAACCCTGATCTAGCGATGCCGCGTGAGTGATGAAGGCCCTAGGGTCGTAAAGCTCTTTCGCCAGAGATGATAATGACAGT…	0	0	0	0	0	0.0141988	0	0	0	0	0	0	0	Bacteria	Proteobacteria	Alphaproteobacteria	Parvularculales	Parvularculaceae	Parvularcula
OTU_18900	ACGAACGCTGGCGGCAGGCCTAACACATGCAAGTCGAGCGCCACCTTCGGGTGGAGCGGCGGACGGGTTAGTAACGCGTGGGAACGTACCCTTCACTAAGGAATAGCCACTGGAAACGGTGAGTAATACCTTATACGCCCTTCGGGGGAAAGATTTATCGGTGAAGGATCGGCCCGCGTTAGATTAGTTAGTTGGTGGGGTAACGGCCTACCAAGACTACGATCTATAGCTGGTTTGAGAGGATGATCAGCAACACTGGGACTGAGACACGGCCCAGACTCCTACGGGAGGCAGCAGTGGGGAATCTTAGACAATGGGGGCAACCCTGATCTAGCCATGCCGCGTGAGTGATGAAGGCCCTAGGGTCGTAAAGCTCTTTCGCCTGTGATGATAATGACA…	0	0	0	0	0	0	0	0	0.00893855	0.00594694	0	0	0	Bacteria	Proteobacteria	Alphaproteobacteria	Rhodobacterales	Rhodobacteraceae	Jannaschia
OTU_18901	ACGAACGCTGGCGGCAGGCCTAACACATGCAAGTCGAACGAAGCCTTCGGGCTTAGTGGCGCACGGGTGAGTAGCACGTGGGAACCTACCTTACGGTACGGAATAACTCAGGGAAACTTGGGCTAATACCGTATACGTCCTTCGGGAGAAAGATTTATCGCCGTAAGATGGGCCCGCGCCCGATTAGCTAGTTGGTGGGGTAACGGCCTACCAAGGCTGCGATCGGTAGCTGGTCTGAGAGGATGATCAGCCACACTGGGACTGAGACACGGCCCAGACTCCTACGGGAGGCAGCAGTGGGGAATATTGGACAATGGGCGCAAGCCTGATCCAGCCATGCCGCGTGAGTGAAGAAGGCCTTAGGGTTGTAAAGCTCTTTCAGCGGGGAAGATGATGACG…	0	0	0	0	0	0	0	0	0	0.00960659	0	0	0	Bacteria	Proteobacteria	Alphaproteobacteria	Rhodobacterales	Rhodobacteraceae	Roseobacter_clade_NAC11-7_lineage
OTU_18902	GCGAACGCTGGCGGCAGGCTTAACACATGCAAGTCGAGCGGGCGTAGCAATACGTCAGCGGCAGACGGGTGAGTAACGCGTGGGAACGTACCTTTTGGTTCGGAACAACTGAGGGAAACTTCAGCTAATACCGGATAAGCCCTTACGGGGAAAGATTTATCGCCGAAAGATCGGCCCGCGTCTGATTAGCTAGTTGGTGAGGTAACGGCTCACCAAGGCGACGATCAGTAGCTGGTCTGAGAGGATGATCAGCCACATTGGGACTGAGACACGGCCCAAACTCCTACGGGAGGCAGCAGTGGGGAATATTGGACAATGGGCGCAAGCCTGATCCAGCCATGCCGCGTGAGTGATGAAGGCCCTAGGGTTGTAAAGCTCTTTTGTGCGGGAAGATAATGA…	0	0	0	0	0	0	0	0	0	0	0.0148725	0	0	Bacteria	Proteobacteria	Alphaproteobacteria	Rhodospirillales	Rhodospirillaceae	NA
OTU_19420	TTGAACGCTGGAGGTATGCTTAACACATGCAAGTCGAACGCGAACGTTTCTTCGGAGACAAGTAGAGTGGCGGACGGGTGAGTAACGCGTAGGAATCTACCTAAGTGTGGGGGATAACATGGAGAAATTCATGCTAATACCGCATACGCCCCACGGGGTAAAGAGGGCCTCTTCTTGAAAGCTCTTGCATTTAGATGAGCCTGCGTCGGATTAGCTTGTTGGCGGGGTAATGGCCCACCAAGGCGACGATCCGTAGCTGGTCTGAGAGGATGATCAGCCACACTGGGACTGAGACACGGCCCAGACTCCTACGGGAGGCAGCAGTGGGGAATATTGGACAATGGGCGCAAGCCTGACGGAGCAATACCGCGTGAGGGAAGAATGCCTGAGGGTTGTAAA…	0.0218103	0	0	0	0	0	0	0	0	0	0	0	0	Bacteria	Proteobacteria	Gammaproteobacteria	Arenicellales	Arenicellaceae	Arenicella
OTU_19425	ACGAACGCTGGCGGCAGGCCTAACACATGCAAGTCGAACGAACCTTCGGGTTAGTGGCGCACGGGTGCGTAACGCGTGGGAATATACCCTAGAGTAAGGAATAACTGCTGGAAACGGTAGCTAATACCTTATAATGACTTCGGTCCAAAGATTTATCGCTCTAGGATTAGCCCGCGTCAGATTAGATAGTTGGTGAGGTAAAGGCTCACCAAGTCGACGATCTGTAGGGGGTCTGAGAGGATGATCCCCCACACTGGTACTGAGACACGGACCAGACTCCTACGGGAGGCAGCAGTGAGGAATATTGGACAATGGAGGAAACTCTGATCCAGCCATGCCGCGTGAGTGAAGAAGGCCTTAGGGTTGTAAAGCTCTTTCAATAGTGAAGATAATGACGGT…	0	0	0	0	0	0	0	0	0	0.00914913	0	0	0	Bacteria	Proteobacteria	Alphaproteobacteria	Alphaproteobacteria_Incertae_Sedis	Unknown_Family	NA
OTU_19426	ATGAACGCTGGCGGTATGCCTAACACATGCAAGTTGAACGAAAGCTTATGCTTTAGTGGCGGACGGGTGAGTAATGCATGAGAATCTGCCTTTAGGAAAGGAATAACAATTGGAAACGACTGCTAATACCTTATATGCTATTTATAGTGAAAAGAGTAATCTGCCTAGAGATGAGCTCATGTCTGATTAGCTAGTTGGTGGGGTAAAGGCTTACCAAGGCGACGATCAGTAGCTGGTTTGAGAGGATGATCAGCCACACTGGGACTGAGACACGGCCCAGACTCCTACGGGAGGCAGCAGTGGGGAATATTGCACAATGGGCGAAAGCCTGATGCAGCCATGCCGCGTGTGTGAAGAAGGCCTTCGGGTTGTAAAGCACTTTCAGTCGTGAGGAAGAGG…	0	0	0	0	0	0	0	0	0	0	0	0.0122699	0	Bacteria	Proteobacteria	Gammaproteobacteria	Alteromonadales	Alteromonadaceae	Agarivorans
OTU_19978	ATGAACGCTAGTAGTATGCTTAACACATGCAAGTCGAACGGAAATTTATTTTCGTGGCGTACGGGTGAGTAAACGCAGAATCTTTCCTTTTAGTTCAGAACAAAAATTTCCTTCGGGTAATAAAATACTGAATATAATTAAAGGTGTATTTCCGCTAAAAGATAGGTCTGCTTAAGATTAGGTTGTTGGTAATTTAAAAGCTTACCAAGCCGATGATCTTTAGTTGGTCTGAGAGGACGATCAACCACACTGGAACTGAAATAAGGTCCAGGCTAATACGTTGGCCAGCAGTGAGGAATATTGGACAATGAACGAAAGTTTGATCCAGCAATACTAACTGGATGATGACGGCTTATTTAAGTTGTAAAATCCTTTAATTAAAGAAGATAATGACATTAT…	0	0.00980392	0	0	0	0	0	0	0	0	0	0	0	Bacteria	Proteobacteria	Alphaproteobacteria	Rickettsiales	Mitochondria	NA
OTU_19982	ACGAACGCTGGCGGCAGGCCTAACACATGCAAGTCGAGGGAGAAGCCATTCTTCGGAGTGGTGGAGACCGGCGCACGGGTGAGTAACGCGTGGGAACCTGCCCTGGGGTGGGGGATAACCGCTGGAAACGGCGGCTAATACCGCATACGCCTTTCGAGGGAAAGCTTTAGCGCCCTGGGATGGTCCCGCGTCCGATTAGCTTGTTGGTGGGGTAACGGCCTACCAAGGCGACGATCGGTAGCTGGTCTGAGAGGATGATCAGCCACACTGGGACTGAGACACGGCCCAGACTCCTACGGGAGGCAGCAGTGGGGAATATTGGACAATGGGCGCAAGCCTGATCCAGCCATGCCGCGTGAGTGAAGAAGGCCTTAGGGTTGTAAATCTCTTTCACCGGTG…	0	0	0	0	0.012934	0	0	0	0	0	0	0	0	Bacteria	Proteobacteria	Alphaproteobacteria	Rhodospirillales	Rhodospirillaceae	NA
OTU_19983	ATGAACGCTGGCGGCAGGCCTAACACATGCAAGTCGAGCGAACCTTCGGGTTAGCGGCGGACGGGTTAGTAACGCGTGGGAATATACCCAATGGTACGGAATAGCCTCTGGAAACGGAGAGTAATACCGTATGTGCCCTTCGGGGGAAAGATTTATCGCCATTGGATTAGCCCGCGTTGGATTAGGTAGTTGGTGGGGTAACGGCCTACCAAGCCTACGATCCATAGCTGGTTTGAGAGGATGATCAGCAACACTGGGACTGAGACACGGCCCAGACTCCTACGGGAGGCAGCAGTGGGGAATCTTCGGCAATGGGCGAAAGCCTGACCGAGCCATGCCGCGTGAGCGATGAAGGCCTTAGGGTTGTAAAGCTCTTTCGCCAGGGAAGATAATGACGGT…	0	0	0	0	0	0	0	0.00577293	0	0.00457457	0	0	0	Bacteria	Proteobacteria	Alphaproteobacteria	Rhodobacterales	Rhodobacteraceae	Roseobacter_clade_CHAB-I-5_lineage
OTU_19984	ACGAACGCTGGCGGCAGGCTTAACACATGCAAGTCGAGCGCCCACTTCGGTGGGAGCGGCAGACGGGTTAGTAACGCGTGGGAACGTGCCCTTCGGTACGGAATAGCCCCGGGAAACTGGGTGTAATACCGTATACGACCTCCGGGTGAAAGATTTATCGCCGAAGGATCGGCCCGCGTTAGATTAGCTAGATGGTGAGGTAAAGGCTTACCATGGCGACGATCTATAGCTGTTCTGAGAGGAAGATCAGCAACACTGGGACTGAGACACGGCCCAGACTCCTACGGGAGGCAGCAGTGGGGAATATTGGACAATGGGCGAAAGCCTGATCCAGCCATGCCGCGTGGATGAAGAAGGCCCTAGGGTTGTAAAGTCCTTTCGATGGTGAAGATAATGACG…	0	0	0	0	0	0	0	0	0	0.00869167	0	0	0	Bacteria	Proteobacteria	Alphaproteobacteria	Parvularculales	Parvularculaceae	NA
OTU_20599	ACGAACGCTGGCGGCAGGCCTAACACATGCAAGTCGAACGGTCTCTTCGGAGATAGTGGCGGACGGGTTAGTAACGCGTGGGAATATGCCCCTGGGTACGGAACAACAGCTGGAAACGGCTGCTAATACCGTATGATGTCTACGGACCAAAGATTTATCGCCCAGGGATTAGCCCGCGTTGGATTAGGTAGTTGGAGGGGTAACGGCCCACCAAGCCTACGATCCATAGCTGGTTTGAGAGGATGATCAGCAACACTGGGACTGAGACACGGCCCAGACTCCTACGGGAGGCAGCAGTGGGGAATCTTAGACAATGGGGGAAACCCTGATCTAGCCATGCCGCGTGATCGATGACGGCCTTAGGGTTGTAAAGATCTTTCGCCGGGGACGATAATGACG…	0	0	0.0177866	0	0	0	0	0	0	0	0	0	0	Bacteria	Proteobacteria	Alphaproteobacteria	Rhodobacterales	Rhodobacteraceae	NA
OTU_20600	ACGAACGCTGGCGGCAGGCCTAACACATGCAAGTCGAACGAACCTTTTAGGTGAGTGGCGCACGGGTGCGTAACACGTGGGAATCTACCCTTGAGTAAGGAACAACAGTTGGAAACGACTGCTAATACCTTATAATGACTCCGGTCCAAAGATTTATCGCTCAAGGATGAGCCCGCGTCTGATTAGATAGTTGGTGGGGTAATGGCCTACCAAGTCGACGATCAGTAGGGGGTCTGAGAGGATGATCCCCCACACTGGAACTGAGACACGGTCCAGACTCCTACGGGAGGCAGCAGTGAGGAATATTGGACAATGGGCGAAAGCCTGATCCAGCCATGCCGCGTGAGTGAAGAAGGCCTTAGGGTTGTAAAGCTCTTTCAGATGCGAAGATAATGACGG…	0	0	0	0.00545989	0.00340368	0	0	0	0	0	0	0	0	Bacteria	Proteobacteria	Alphaproteobacteria	Alphaproteobacteria_Incertae_Sedis	Unknown_Family	NA
OTU_20601	ACGAACGCTGGCGGCAGGCCTAACACATGCAAGTCGAGCGCACCTTCGGGTGAGCGGCGGACGGGTTAGTAACGCGTGGGAATATACCCTTCTCTACGGAATAGCCTCGGGAAACTGAGAGTAATACCGTATAAGCCCTTCGGGGGAAAGATTTATCGGTGAAGGATTAGCCCGCGTTAGATTAGATAGTTGGTGGGGTAATGGCCTACCAAGTCTACGATCTATAGCTGGTTTTAGAGGACGATCAGCAACACTGGGACTGAGACACGGCCCAGACTCCTACGGGAGGCAGCAGTGGGGAATCTTAGACAATGGGCGAAAGCCTGATCTAGCCATGCCGCGTGAGTGATGAAGGCCCTAGGGTCGTAAAGCTCTTTCGCCAGGGATGATAATGACAGT…	0	0	0	0	0	0.0121704	0	0	0	0	0	0	0	Bacteria	Proteobacteria	Alphaproteobacteria	Rhodobacterales	Rhodobacteraceae	Roseobacter
OTU_21203	ACGAACGCTGGCGGCAGGCCTAACACATGCAAGTCGAGCGCACCCTTCGGGGCGAGCGGCGGACGGGTTAGTAACGCGTGGGAATGTACCCAGATCTACGGAATAGCCTTTGGAAACGAAGAGTAATACCGTATACGCCCTTCGGGGGAAAGATTTATCGGATTTGGATCAGCCCGCGTTAGATTAGATAGTTGGTGGGGTAATGGCCTACCAAGTCTACGATCTATAGCTGGTTTTAGAGGATGATCAGCAACACTGGGACTGAGACACGGCCCAGACTCCTACGGGAGGCAGCAGTGGGGAATCTTAGACAATGGGCGCAAGCCTGATCTAGCCATGCCGCGTGTGTGATGAAGGCCCTAGGGTCGTAAAGCACTTTCGCCAGGGATGATAATGACA…	0	0	0.0167984	0	0	0	0	0	0	0	0	0	0	Bacteria	Proteobacteria	Alphaproteobacteria	Rhodobacterales	Rhodobacteraceae	NA
OTU_21204	ACGAACGCTGGCGGCAGGCCTAACACATGCAAGTCGAACGCATCCTTCGGGATGAGTGGCGCACGGGTGAGTAACGCGTGGGAACGTACCTTGGAGTGCGGAATAACCATTGGAAACGATGGCTAATACCGCATACGCCCCTAGGGGGAAAGATTTATCGCTCCAAGATCGGCCCGCGTCCGATTAGTTAGTTGGTGAGGTAACGGCTCACCAAGGCGACGATCGGTAGCTGTTCTGAGAGGATGATCAGCCACACTGGGACTGAGACACGGCCCAGACTCCTACGGGAGGCAGCAGTGGGGAATATTGCGCAATGGGGGCAACCCTGACGCAGCCATGCCGCGTGAGTGAAGAAGGCCTTCGGGTTGTAAAGCTCTTTCAGGTGCGACGATGATGACG…	0	0	0.0167984	0	0	0	0	0	0	0	0	0	0	Bacteria	Proteobacteria	Alphaproteobacteria	Rhodospirillales	Rhodospirillaceae	Rhodospirillum
OTU_21205	ACGAACGCTGGCGGCAGGCTTAACACATGCAAGTCGAACGAACCTTCGGGTGAGTGGCGCACGGGTGCGTAACGCGTGGGAATATACCCTTGAGTAAGGAATAACGTAGAGAAATTTGCGCTAATACCTTATAATGACTTCGGTCCAAAGATTTATCGCTCAAGGATTAGCCCGCGTCAGATTAGATAGTTGGTGAGGTAACGGCTCACCAAGTCGACGATCTGTAGGGGGTCTGAGAGGATGATCCCCCACACTGGTACTGAGACACGGACCAGACTCCTACGGGAGGCAGCAGTGAGGAATATTGGACAATGGGGGAAACCCTGATCCAGCCATGCCGCGTGAGTGAAGACGGCCTTAGGGTTGTAAAGCTCTTTCAATTGCGAAGATAATGACGGT…	0	0	0	0	0	0	0.0136109	0	0	0	0	0	0	Bacteria	Proteobacteria	Alphaproteobacteria	Alphaproteobacteria_Incertae_Sedis	Unknown_Family	NA
OTU_21206	ACGAACGCTGGCGGCACGCCTAACACATGCAAGTCGAGCGCACCTTCGGGTGAGCGGCGGACGGGTTAGTAACGCGTGGGAACGTACCCTTTTCTACGGAATAGCCTCGGGAAACTGAGAGTAATACCGTATACGCCCTTTTGGGGAAAGATTTATCGGTGAAGGATCGGCCCGCGTTAGATTAGATAGTTGGTGGGGTAATGGCCTACCAAGTCTACGATCTATAGCTGGTTTGAGAGGATGATCAGCAACACTGGGACTGAGACACGGCCCAGACTCCTACGGGAGGCAGCAGTGGGGAATCTTAGACAATGGGCGCAAGCCTGATCTAGCGATGCCGCGTGAGTGACGAAGGTCTTAGGATCGTAAAGCTCTTTCGCCAGGGATGATAATGACAGT…	0	0	0	0	0	0	0.0136109	0	0	0	0	0	0	Bacteria	Proteobacteria	Alphaproteobacteria	Rhodobacterales	Rhodobacteraceae	Loktanella
OTU_21207	ACGAACGCTGGCGGCAGGCCTAACACATGCAAGTCGAACGCTCTCTTCGGAGGGAGTGGCGCACGGGTGAGTAACGCGTGGGAACCTAGCTCTTGGTACGGAACAACCGCGGGAAACTGCGGCTAATACCGTATATGCCCCCCATGAGAGATTGTGGGGGGGAAAGATTTATCGCCGAGAGATGGGCCCGCGTCTGATTAGCTAGTTGGTGAGGTAACGGCTCACCAAGGCATCGATCAGTAGCTGGTCTGAGAGGATGATCAGCCACACTGGGACTGAGACACGGCCCAGACTCCTACGGGAGGCAGCAGTGGGGAATATTGGACAATGGGCGCAAGCCTGATCCAGCCATGCCGCGTGAGTGAAGAAGGCCCTAGGGTTGTAAAGCTCTTTCAACGG…	0	0	0	0	0	0	0	0.0109044	0	0	0	0	0	Bacteria	Proteobacteria	Alphaproteobacteria	Rhodospirillales	Rhodospirillaceae	NA
OTU_21209	ACGAACGCTGGCGGCAGGCCTAACACATGCAAGTCGAGCGAACTCTTCGGAGTTAGCGGCGGACGGGTTAGTAACGCGTGGGAATATGCCCAAAGGTACGGAACAACAGTTGGAAACGGCTGCTAATACCGTATGTGCCCTACGGGGGAAAGATTTATCGCCTTTGGATTAGCCCGCGTTGGATTAGGTAGTTGGTGGGGTAACGGCCTACCAAGCCTACGATCCATAGCTGGTTTGAGAGGATGATCAGCAACACTGGGACTGAGACACGGCCCAGACTCCTACGGGAGGCAGCAGTGGGGAATCTTGGACAATGGGGGCAACCCTGATCCAGCCATGCCGCGTGAGTGATGAAGGCCTTAGGGTCGTAAAGCTCTTTCAGCTGGGAAGATAATGACG…	0	0	0	0	0	0	0	0	0	0	0	0	0.0326923	Bacteria	Proteobacteria	Alphaproteobacteria	Rhodobacterales	Rhodobacteraceae	NA
OTU_789	TTGAACGCTGGCGGCATGCCTAACACATGCAAGTCGAACGCGAAAGCACCTTCGGGTGCAAGTAGAGTGGCGGACGGGTGAGTAACGCGTGGGAATCTGCCTAGTAGTGGGGGATAACTCGAGGAAACTCGAGCTAATACCGCATACGCCCTATGGGGGAAAGGCTTCGGCCGCTATTAGATGAGCCCGCGTCAGATTAGCTTGTTGGTGAGGTAATGGCTCACCAAGGCAACGATCTGTAGCTGGTCTGAGAGGACGAACAGCCACACTGGGACTGAGACACGGCCCAGACTCCTACGGGAGGCAGCAGTGGGGAATATTGGACAATGGGCGAAAGCCTGATCCAGCAATGCCGCGTGTGTGAAGAAGGCCTGCGGGTTGTAAAGCACTTTCAGTTGG…	0	0	0	0	0	0	0	0.010263	0	0	0	0	0	Bacteria	Proteobacteria	Alphaproteobacteria	Parvularculales	Parvularculaceae	Parvularcula
OTU_13946	ACGAACGCTGGCGGCAGGCCTAACACATGCAAGTCGAGCGAGACCTTCGGGTCTAGCGGCGGACGGGTTAGTAACGCGTGGGAACGTACCCAGCTCTGCGGAATAGCCTCTGGAAACGGAGAGTAATACCGCATACGCCCTTCGGGGGAAAGAGTTTCGGGGTTGGATCGGCCCGCGTTAGATTAGGTAGTTGGTGGGGTAATGGCCTACCAAGCCTACGATCTATAGCTGGTTTGAGAGGATGATCAGCAACACTGGGACTGAGACACGGCCCAGACTCCTACGGGAGGCAGCAGTGGGGAATCTTCGGCAATGGGGGCAACCCTGACCGAGCCATGCCGCGTGAGTGATGAAGGCCTTAGGGTCGTAAAGCTCTTTCGCCAGAGATGATAATGACAG…	0	0	0	0	0	0	0	0.010263	0	0	0	0	0	Bacteria	Proteobacteria	Proteobacteria_Incertae_Sedis	Unknown_Order	Unknown_Family	Candidatus_Thiobios
OTU_21920	ATGAACGCTAGCGGGAGGCTTAATACATGCAAGTCGAAGGACCTTTTCGGAGGGACTGGCGCACGGGTGAGTAACGCGTACACTACCTACCTTTAACAGGGGGACAGCCTTTGGAAACGAAGATTAATACCCCATAGTACCGAGAGGTTAAAGCGTTAGCGGTTAAAGATGGGTGTGCGTGTCATTAGATAGTTGGTAAGGTAACGGCTTACCAAGTCTACGATGACTAGGGGGCGTGAGAGCGTGAACCCCCACACGGGTACTGAGACACGGACCCGACTCCTACGGGAGGCAGCAGTAAGGAATATTGGACAATGGGCGGAAGCCTGATCCAGCCATCCCGCGTGTAGGATGACTGCCCTATGGGTTGTAAACTACTTTTGTACGAGAAGAAACACC…	0	0	0.0158103	0	0	0	0	0	0	0	0	0	0	Bacteria	Proteobacteria	Alphaproteobacteria	Rhodobacterales	Rhodobacteraceae	Roseobacter_clade_CHAB-I-5_lineage
OTU_21921	ATGAACGCTAGTAGTATGCTTAACACATGCAAGTCGAACGAAAGCTTAGGCTTTCGTGGCGTACGGGTGAGTATTCGCAGAATTTTCCCTTTCAGTTCAGGACAAAAATTTACTTAGTTAAGTTCAAATACTGAATATTTTTTCAAAGGTTAATTCCGCTGAAAGATAAATTTGCATAAGATTAGGTTGTTGGTGAATTAAAAGCTCACCAAGCCAACGATCTTTAGTTGGTCTTAGAGGATGATCAACCACACTGGAACTGAAATAAGGTCCAGGCTGACACGTCGGCCAGCAGTGAGGAATATTGGACAATGAACGAAAGTTTGATCCAGCAATACTAACTGGGTGATGACGGCTTATTTAAGTTGTAAGATCCTTTAATTAAAGAAGATAATGACA…	0	0	0	0.0050399	0	0	0	0	0	0	0	0	0.00769231	Bacteria	Bacteroidetes	Sphingobacteriia	Sphingobacteriales	Saprospiraceae	NA
OTU_21925	ACGAACGCTGGCGGCAGGCCTAACACATGCAAGTCGAGCGCACCTTCGGGTGAGCGGCGGACGGGTTAGTAACGCGTGGGAACATACCTTTCGGTAAGGAATAGCCACTGGAAACGGTGAGTAATACCTTATACGCCCTTCGGGGGAAAGATTTATCGCCGAGAGATTGGCCCGCGTTAGATTAGGTAGTTGGTGGGGTAACGGCCTACCAAGCCTACGATCTATAGCTGGTTTTAGAGGATGATCAGCAACACTGGGACTGAGACACGGCCCAGACTCCTACGGGAGGCAGCAGTGGGGAATCTTGGACAATGGGCGCAAGCCTGATCCAGCCATGCCGCGTGAGTGATGAAGGCCCTAGGGTCGTAAAGCTCTTTCGCCAGGGATGATAATGACAGT…	0	0	0	0	0	0	0.00160128	0	0	0	0	0.00490798	0.0115385	Bacteria	Proteobacteria	Alphaproteobacteria	Rickettsiales	Mitochondria	NA
OTU_21927	ACGAACGCTGGCGGCAGGCCTAACACATGCAAGTCGAGCGAACTCTTCGGAGTTAGCGGCGGACGGGTTAGTAACGCGTGGGAATATACCCAAAGGTACGGAACAACAGTTGGAAACGGCTGCTAATACCGTATGTGCCCTACGGGGGAAAGATTTATCGCCTTTGGATTAGCCCGCGTTGGATTAGGTAGTTGGTGGGGTAACGGCCTACCAAGCCTACGATCCATAGCTGGTTTGAGAGGATGATCAGCAACACTGGGACTGAGACACGGCCCAGACTCCTACGGGAGGCAGCAGTGGGGAATCTTGGACAATGGGGGCAACCCTGATCCAGCCATGCCGCGTGAGTGATGAAGGCCTTAGGGTCGTAAAGCTCTTTCAGCTGGGAAGATAATGACG…	0	0	0	0	0	0	0	0	0	0.0073193	0	0	0	Bacteria	Proteobacteria	Alphaproteobacteria	Rhodobacterales	Rhodobacteraceae	Thalassobius
OTU_21928	ACGAACGCTGGCGGCAGGCCTAACACATGCAAGTCGAGCGCACCTTCGGGTGAGCGGCGGACGGGTTAGTAACGCGTGGGAACGTACCTTTCGGTAAGGAATAGCCACTGGAAACGGTGAGTAATACCTTATACGCCCTTTGGGGGAAAGATTTATCGCCGAGAGATCGGCCCGCGTTAGATTAGGTAGTTGGTGGGGTAACGGCCTACCAAGCCTACGATCTATAGCTGGTTTTAGAGGATGATCAGCAACACTGGGACTGAGACACGGCCCAGACTCCTACGGGAGGCAGCAGTGGGGAATCTTGGACAATGGGCGCAAGCCTGATCCAGCCATGCCGCGTGAGTGATGAAGGCCCTAGGGTCGTAAAGCTCTTTCGCCAGGGATGATAATGACAGT…	0	0	0	0	0	0	0	0	0	0.0073193	0	0	0	Bacteria	Proteobacteria	Alphaproteobacteria	Rhodobacterales	Rhodobacteraceae	NA
OTU_21931	ACGAACGCTGGCGGCAGGCTTAACACATGCAAGTCGAACGAACTCTTCGGAGTGAGTGGCAGACGGGTGCGTAACACGTGGGAACCTACCCTGAGGTACGGAATAACAGTTAGAAATGACTGCTAATACCGTATATGTCTTCGGATGAAAGATTTATCGCCTTAGGATGGGCCCGCGGCTGATTAGCTAGTTGGTGAGGTAAAAGCTTACCAAGGCGACGATCAGTAGCTGGTCTGAGAGGATGATCAGCCACACTGGAACTGAGACACGGTCCAGACTCCTACGGGAGGCAGCAGTGAGGAATATTGGACAATGGGGGAAACCCTGATCCAGCCATGCCGCGTGAGTGATGAAGGCCTTAGGGTTGTAAAACTCTTTCGCTAGGGAAGATAATGACGG…	0	0	0	0	0	0	0	0	0	0	0	0.00981595	0	Bacteria	Proteobacteria	Alphaproteobacteria	Rhodobacterales	Rhodobacteraceae	Thalassobius
OTU_1471	ACGAACGCTGGCGGCAGGCTTAACACATGCAAGTCGAACGAACCCTTCGGGGTGAGTGGCAGACGGGTGCGTAACACGTGGGAACCTACCCTTCGGTACGGAATAACGCAGAGAAATTTGTGCTAATACCGTATACGACCTTCGGGTGAAAGATTTATCGCCGAAGGATGGGCCCGCGGCTGATTAGCTAGTTGGTAAGGTAATGGCTTACCAAGGCGACGATCAGTAGCTGGTTTGAGAGGATGATCAGCCACACTGGAACTGAGACACGGTCCAGACTCCTACGGGAGGCAGCAGTGGGGAATATTGGACAATGGGCGAAAGCCTGATCCAGCCATGCCGCGTGAGTGATGAAGGCCTTAGGGTTGTAAAACTCTTTCGATGGTGAAGATAATGACG…	0.0163577	0	0	0	0	0	0	0	0	0	0	0	0	Bacteria	Proteobacteria	Alphaproteobacteria	Parvularculales	Parvularculaceae	Parvularcula
OTU_9576	ACGAACGCTGGCGGCAGGCTTAACACATGCAAGTCGAACGAACTCTTCGGAGTGAGTGGCAGACGGGTGCGTAACACGTGGGAACCTACCCTAAGGTACGGAATAACGCCGAGAAATTGGTGCTAATACCGTATATGTCTTCGGATGAAAGATTTATCGCCTTAGGATGGGCCCGCGGCTGATTAGGTTGTTGGTGGGGTAACGGCCCACCAAGCCGACGATCAGTAGCTGGTCTGAGAGGATGATCAGCCACACTGGGACTGAGACACGGCCCAGACTCCTACGGGAGGCAGCAGTGAGGAATATTGGACAATGGGGGAAACCCTGATCCAGCCATGCCGCGTGAGTGATGAAGGCCTTAGGGTTGTAAAACTCTTTCACCGGTGAAGATAATGACGG…	0	0	0	0	0	0	0	0	0	0.00686185	0	0	0	Bacteria	Proteobacteria	Alphaproteobacteria	Rhodospirillales	Rhodospirillaceae	Thalassobaculum
OTU_22654	ACGAACGCTGGCGGCAGGCCTAACACATGCAAGTCGAGCGCGCCCTTCGGGGTGAGCGGCGGACGGGTTAGTAACGCGTGGGAACGTGCCCTTCTCTGCGGAATAGCCTCTGGAAACGGAGAGTAATACCGCATACGCCCTTCGGGGGAAAGAATTTCGGGGAAGGATCGGCCCGCGTTAGATTAGGTAGTTGGTGGGGTAACGGCCTACCAAGCCTACGATCTATAGCTGGTTTTAGAGGATGATCAGCAACACTGGGACTGAGACACGGCCCAGACTCCTACGGGAGGCAGCAGTGGGGAATCTTGGACAATGGGCGCAAGCCTGATCCAGCCATGCCGCGTGAGTGATGAAGGCCCTAGGGTCGTAAAGCTCTTTCGCCAGGGATGATAATGACAG…	0	0	0.0148221	0	0	0	0	0	0	0	0	0	0	Bacteria	Proteobacteria	Alphaproteobacteria	Parvularculales	Parvularculaceae	Parvularcula
OTU_22655	ACGAACGCTGGCGGCAGGCCTAACACATGCAAGTCGAGCGGTCTCTTCGGAGGCAGCGGCGGACGGGTGAGTAACGCGTGGGAATATGCCCTGTGGTACGGAACAACAGTTGGAAACGACTGCTAATACCGTATGAGCCCTTCGGGGGAAAGATTTATCGCCATAGGATTAGCCCGCGTTGGATTAGGTAGTTGGTGGGGTAACGGCCTACCAAGCCGACGATCCATAGCTGGTTTGAGAGGATGACCAGTCACACTGGGACTGAGACACGGCCCAGACTCCTACGGGAGGCAGCAGTGGGGAATCATAGACAATGGGGGCAACCCTGATCTTGCCATGCCGCGTGGACGATGAAGGCCTTAGGGTTGTAAAGTCCTTTCACCCGCGAAGATAATGACG…	0	0	0	0	0.010211	0	0	0	0	0	0	0	0	Bacteria	Proteobacteria	Alphaproteobacteria	Rhodobacterales	Rhodobacteraceae	NA
OTU_22656	ACGAACGCTGGCGGCAGGCTTAACACATGCAAGTCGAGCGCCCACTTCGGTGGGAGCGGCAGACGGGTGAGTAACGCGTGGGAATATACCTATCTCTAGGGAACAACAGTTGGAAACGACTGCTAATGCCTTATACGCCCTTAGGGGGAAAGATTTATCGGAGATAGATTAGCCCGCGTTAGATTAGCTAGTTGGTGAGGTAATGGCTCACCAAGGCGACGATCTATAGCTGGTCTGAGAGGATGATCAGCCACACTGGAACTGAGACACGGTCCAGACTCCTACGGGAGGCAGCAGTGGGGAATATTGGACAATGGGCGCAAGCCTGATCCAGCCATGCCGCGTGAGTGATGAAGGCCTTAGGGTTGTAAAGCTCTTTCAACGGTGAAGATAATGACG…	0	0	0	0	0	0.010142	0	0	0	0	0	0	0	Bacteria	Proteobacteria	Alphaproteobacteria	Rhodobacterales	Rhodobacteraceae	Rubribacterium
OTU_22657	GCGAACGCTGGCGGCATGCCTAACACATGCAAGTCGAACGGCTCTTCGGAGCAGTGGCGCACGGGTGAGTAACGCGTGGGAACCTACCCCGAGGTACGGAATAACGGCTGGAAACGGCCGCTAATACCGTATGTGTCCTGAGGGAGAAAGATTTATCGCCTTGGGAGGGGCCCGCGTTCGATTAGCTAGTTGGTGAGGTAATGGCTCACCAAGGCTTCGATCGATAGCTGGTCTGAGAGGATGATCAGCCACACTGGGACTGAGACACGGCCCAGACTCCTACGGGAGGCAGCAGTGGGGAATATTGGACAATGGGGGGAACCCTGATCCAGCAATGCCGCGTGTGTGATGAAGGCCTTAGGGTTGTAAAGCACTTTCGCCGGTGACGATGATGACGGT…	0	0	0	0	0	0	0	0.00962155	0	0	0	0	0	Bacteria	Proteobacteria	Alphaproteobacteria	Rhizobiales	Phyllobacteriaceae	NA
OTU_9209	ACGAACGCTGGCGGTAGGCCTAACACATGCAAGTCGAGCGATCTCTTCGGAGATAGCGGCGGACGGGTGAGTAACGCGTGGGAACATACCCAGAGGTACGGAACAACAGTTAGAAATGACTGCTAATACCGTATACGCCCTACGGGGGAAAGAATTTCGCCTTTGGATTGGCCCGCGTTGGATTAGATAGTTGGTGGGGTAACGGCCTACCAAGTCTACGATCCATAGCTGGTTTGAGAGGATGATCAGCCACACTGGGACTGAGACACGGCCCAGACTCCTACGGGAGGCAGCAGTGGGGAATCTTAGACAATGGGCGCAAGCCTGATCTAGCCATACCGCGTGAGTGATGAAGGCCCTAGGGTCGTAAAGCTCTTTCGCCAGGGATGATAATGACAG…	0	0.00722394	0	0	0	0	0	0	0	0	0	0	0	Bacteria	Proteobacteria	Alphaproteobacteria	Rhodobacterales	Rhodobacteraceae	NA
OTU_23405	ACGAACGCTGGCGGCACGCCTAACACATGCAAGTCGAGCGCACCTTCGGGTGAGCGGCGGACGGGTTAGTAACGCGTGGGAACATACCCTTTTCTACGGAATAGCCTCGGGAAACTGAGAGTAATACCGTATACGCCCTTCGGGGGAAAGATTTATCGGTGAAGGATTGGCCCGCGTTAGATTAGTTAGTTGGTGGGGTAACGGCCTACCAAGACGACGATCTATAGCTGGTTTGAGAGGATGATCAGCAACACTGGGACTGAGACACGGCCCAGACTCCTACGGGAGGCAGCAGTGGGGAATCTTAGACAATGGGCGAAAGCCTGATCTAGCGATGCCGCGTGAGTGATGAAGGCCCTAGGGTCGTAAAGCTCTTTCGCCAGAGATGATAATGACAGT…	0	0	0.013834	0	0	0	0	0	0	0	0	0	0	Bacteria	Proteobacteria	Alphaproteobacteria	Rhodobacterales	Rhodobacteraceae	NA
OTU_23406	ACGAACGCTGGCGGCAGGCCTAACACATGCAAGTCGAACGGACTCTTCGGAGTTAGTGGCGCACGGGTGAGGAACACGTGGGAACATACCCTTTGGTAAGGAATAATGTCTGGAAACGGGCACTAATACCTTATAATGACTTCGGTCCAAAGATTTATCGCCAAAGGATTGGCCCGCGCATGATTAGATAGTTGGTGAGGTAACGGCTCACCAAGTCTACGATCATTAGCTGGTCTGAGAGGATGATCAGCCACACTGGAACTGAGACACGGTCCAGACTCCTACGGGAGGCAGCAGTGAGGAATATTGCACAATGGAGGAAACTCTGATGCAGCCATGCCGCGTGTATGAAGAAGGCCTTAGGGTTGTAAAGTACTTTCAATTGTGAAGATAATGACG…	0	0	0.013834	0	0	0	0	0	0	0	0	0	0	Bacteria	Proteobacteria	Alphaproteobacteria	Rhodobacterales	Rhodobacteraceae	Jannaschia
OTU_23407	ACGAACGCTGGCGGCACGCCTAACACATGCAAGTCGAACGAGAAGCCCTTTCGGGGGTGGACAGTGGCGGACGGGTGAGTAACACGTGGGAACATGCCTTTTGGTACGGAACAACCATTGGAAACGATGGCTAATACCGTATACGCCCCCTTTGAGTAGTATCTTAGGGGGGAAAGATTTATCGCCGAAAGATTGGCCCGCGCTAGATTAGCTAGTTGGTGAGGTAAGAGCTCACCAAGGCGACGATCTATAGCTGGTTTGAGAGGATGATCAGCCACACTGGGACTGAGACACGGCCCAGACTCCTACGGGAGGCAGCAGTGGGGAATATTGGACAATGGGGGCAACCCTGATCCAGCGATGCCGCGTGAGTGATGAAGGCCTTAGGGTTGTAAAACT…	0	0	0	0.00587988	0	0	0	0	0	0	0	0	0	Bacteria	Proteobacteria	Alphaproteobacteria	Alphaproteobacteria_Incertae_Sedis	Unknown_Family	NA
OTU_23408	ACGAACGCTGGCGGCAGGCCTAACACATGCAAGTCGAACGAACCTTCGGGTGAGTGGCGCACGGGTGCGTAACACGTGGGAATATACATTTCGGTAAGGAATAACGTAGAGAAATTTACGCTAATACCTTATAATGACTCCGGTCCAAAGATTTATCGCCGAAAGATTAGCCCGCGCTAGATTAGGTTGTTGGTGAGGTAAAGGCTCACCAAGCCTACGATCTATAGCTGGTCTGAGAGGATGATCAGCCACACTGGAACTGAGACACGGTCCAGACTCCTACGGGAGGCAGCAGTGAGGAATATTGCGCAATGGAGGAAACTCTGACGCAGCCATGCCGCGTGAGTGAAGAAGGCCTTAGGGTTGTAAAGCTCTTTCAGATGCGAAGATAATGACGGT…	0	0	0	0	0	0	0	0	0	0.00640439	0	0	0	Bacteria	Proteobacteria	Alphaproteobacteria	Kordiimonadales	Kordiimonadaceae	Kordiimonas
OTU_23409	ACGAACGCTGGCGGCAGGCCTAACACATGCAAGTCGAACGCTCTCTTCGGAGGGAGTGGCGGACGGGTGAGTATCGCGTGGGAACCTAGCCTTTGGTACGGAACAACCGCGGGAAACTGCGGCTAATACCGTATATACCCTCCGGGGGAAAGATTCATCGCCAAGGGATGGGCCCGCGTCTGATTAGCTTGTTGGTGAGGTAACGGCTCACCAAGGCATCGATCAGTAGCTGGTCTGAGAGGATGATCAGCCACACTGGGACTGAGACACGGCCCAGACTCCTACGGGAGGCAGCAGTGGGGAATATTGGACAATGGGGGCAACCCTGATCCAGCCATGCCGCGTGAGTGAAGAAGGCCTTAGGGTTGTAAAGCTCTTTCAACGGTGAAGATGATGACA…	0	0	0	0	0	0	0	0	0	0.00640439	0	0	0	Bacteria	Proteobacteria	Alphaproteobacteria	Alphaproteobacteria_Incertae_Sedis	NA	NA
OTU_23410	ACGAACGCTGGCGGCAGGCTTAACACATGCAAGTCGAACGATCTCTTCGGAGATAGTGGCGGACGGGTGAGTAACGCGTGGGAACATGCCCTGGGGTAGGGAACAACAGCTGGAAACGGCTGCTAATACCTTATAATGTCGATAGACCAAAGATTTATCGCCCTGGGATTGGCCCGCGTTGGATTAGCTAGTTGGTGAGGTAACGGCTTACCAAGGCGACGATCTATAGCTGGTTTGAGAGGATGATCAGCCACACTGGGACTGAGACACGGCCCAGACTCCTACGGGAGGCAGCAGTGGGGAATATTGGACAATGGGGGCAACCCTGATCCAGCCATGCCGCGTGCGTGAAGAAGGCCTTAGGGTTGTAAAGCGCTTTCACAGTCGAGGATAATGACG…	0	0	0	0	0	0	0	0	0	0	0.00991501	0	0	Bacteria	Proteobacteria	Alphaproteobacteria	Rhodospirillales	Rhodospirillaceae	NA
OTU_23411	ACGAACGCTGGCGGCAGGCTTAACACATGCAAGTCGAGCGCCACCTTCGGGTGGAGCGGCGGACGGGTGAGTAACGCGTGGGAACGTGCCCTTTACTACGGAATAGCCATTGGAAACGATGATTAATACCGTATGTGCCCTTCGGGGGAAAGATTTATCGGTAAAGGATCGGCCCGCGTTAGATTAGGTAGTTGGTGGGGTAATGGCCTACCAAGCCGACGATCTATAGCTGGTTTGAGAGGATGATCAGCCACACTGGGACTGAGACACGGCCCAGACTCCTACGGGAGGCAGCAGTGGGGAATCTTAGACAATGGGGGAAACCCTGATCTAGCCATGCCGCGTGTGTGATGAAGGCCCTAGGGTCGTAAAGCACTTTCGCCTGTGAAGATAATGACG…	0	0	0	0	0	0	0	0	0	0	0	0.00858896	0	Bacteria	Proteobacteria	Alphaproteobacteria	NA	NA	NA
OTU_24242	ACGAACGCTGGCGGCAGGCCTAACACATGCAAGTCGAACGGTCCCTTCGGGGATAGTGGCGCACGGGTGCGTAACGCGTGGGAATATGCCCTTCACTACGGAATAATGTCTGGAAACGGACACTAATACCGTATAATGACTCCGGTCCAAAGATTTATCGGTGAAGGATTAGCCCGCGTCTGATTAGTTAGTTGGTGAGGTAATGGCTCACCAAGACGATGATCAGTAGGGGGTCTGAGAGGATGATCCCCCACACTGGTACTGAGACACGGACCAGACTCCTACGGGAGGCAGCAGTGAGGAATATTGGACAATGGAGGAAACTCTGATCCAGCCATGCCGCGTGAGTGAAGAAGGCCTTAGGGTTGTAAAGCTCTTTCAATTGTGAAGATAATGACG…	0	0.00670795	0	0	0	0	0	0	0	0	0	0	0	Bacteria	Proteobacteria	Alphaproteobacteria	Alphaproteobacteria_Incertae_Sedis	Unknown_Family	NA
OTU_24243	ACGAACGCTGGCGGCAGGCTTAACACATGCAAGTCGAACGCCCTCTTCGGAGGGAGTGGCAGACGGGTGAGTAACGCGTGGGAATATACCTATCAGTACGGAACAACAGTTAGAAATGACTGCTAATACCGTATACGTCCTTCGGGAGAAAGATTTATCGCTGATAGATTGGCCCGCGTTAGATTAGCTAGTTGGTGAGGTAATGGCTCACCAAGGCGACGATCTATAGCTGGTCTGAGAGGATGATCAGCCACACTGGAACTGAGACACGGTCCAGACTCCTACGGGAGGCAGCAGTGGGGAATATTGGACAATGGGCGCAAGCCTGATCCAGCCATGCCGCGTGAGTGATGAAGGCCTTAGGGTTGTAAAGCTCTTTCAACGGTGAAGATAATGACG…	0	0	0.0128458	0	0	0	0	0	0	0	0	0	0	Bacteria	Proteobacteria	Alphaproteobacteria	Rhizobiales	Phyllobacteriaceae	NA
OTU_24245	ATGAACGCTAGTAGTATGCTTAACACATGCAAGTCGAACGGAAACTTGTTTTCGTGGCGAACGGGTGAGTAAATGCAGAATTTTCCCTTCTAGTTCAGTACAAAAATTCTTTATTGAATTCAAATTCTGAATATCTAAAGGTTTGTTTTATAAACATTTCGCTAGAAGATAAATCTGTTAAAGATTAGGTTGTTGGTAATTTAATAGCTTACCAAGCCTTTGATCTTTAGTTGGTCTTAGAGGATGATCAACCACACTGGAACTGAAATAAGGTCCAGGCTGACATGTCGGCCAGCAGTGAGGAATATTGGACAATGAACGAAAGTTTGATCCAGCAATACTAACTGGGTGATGACGGCTTATTTAAGTTGTAAGATCCTTTAATTAAAGAAGATAATG…	0	0	0	0.00545989	0	0	0	0	0	0	0	0	0	Bacteria	Proteobacteria	Alphaproteobacteria	Rickettsiales	Mitochondria	NA
OTU_24246	ACGAACGCTGGCGGCAGGCCTAACACATGCAAGTCGAACGAACCTTTATGGTGAGTGGCGCACGGGTGCGTAACACGTGGGAATATACACTTCGGTAAGGAATAACACAGAGAAATTTGTGCTAATACCTTATAATGACTCCGGTCCAAAGATTTATCGCCGAGGGATTAGCCCGCGCCTGATTAGGTAGTTGGTGAGGTAAGAGCTCACCAAGCCGACGATCAGTAGCTGGTCTGAGAGGATGATCAGCCACACTGGAACTGAGACACGGTCCAGACTCCTACGGGAGGCAGCAGTGAGGAATATTGCGCAATGGAGGAAACTCTGACGCAGCCATGCCGCGTGAGTGACGAAGGCCTTAGGGTTGTAAAGCTCTTTCAGATGCGAAGATAATGACGG…	0	0	0	0	0.00884956	0	0	0	0	0	0	0	0	Bacteria	Proteobacteria	Alphaproteobacteria	Alphaproteobacteria_Incertae_Sedis	NA	NA
OTU_24247	ACGAACGCTGGCGGCATGCCTAACACATGCAAGTCGAACGGGAAGCCATCTTCGGATGGTGGAGAGTGGCGCACGGGTGAGTAACGCGTGGGAACCTGCCCTTGAGTGGGGAACAACCGCTGGAAACGGCGGCTAATACCGCATACGCCCTTCGGGGGAAAGCTATATGCGCTCTTGGATGGGCCCGCGTCGGATTAGCTTGTTGGTGGGGTAACGGCCTACCAAGGCTTCGATCCGTAGCTGGTCTGAGAGGATGATCAGCCACACTGGGACTGAGACACGGCCCAGACTCCTACGGGAGGCAGCAGTGGGGAATATTGGACAATGGACGCAAGTCTGATCCAGCAATGCCGCGTGTGTGAAGAAGGCCTTAGGGTTGTAAAGCACTTTCACTCGCGA…	0	0	0	0	0	0.00878972	0	0	0	0	0	0	0	Bacteria	Proteobacteria	Alphaproteobacteria	Rickettsiales	TK34	NA
OTU_24248	ACGAACGCTGGCGGCAGGCTTAACACATGCAAGTCGAACGCCCCTTCGGGGGAGTGGCAGACGGGTGAGTAACGCGTGGGAAACTACCTATCAGTACGGAACAACAGTTAGAAATGACTGCTAATACCGTATACGTCCTTCGGGAGAAAGATTTATCGCTGATAGATGTGCCCGCGTTAGATTAGCTAGTTGGTGAGGTAACTGCTCACCAAGGCGACGATCTATAGCTGGTCTGAGAGGATGATCAGCCACACTGGGACTGAGACACGGCCCAGACTCCTACGGGAGGCAGCAGTGGGGAATATTGGACAATGGGCGAAAGCCTGATCCAGCCATGCCGCGTGAGTGATGAAGGCCCTAGGGTTGTAAAGCTCTTTCAACGGTGAAGATAATGACGGT…	0	0	0	0	0	0	0	0.00833868	0	0	0	0	0	Bacteria	Proteobacteria	Alphaproteobacteria	Rhizobiales	Phyllobacteriaceae	NA
OTU_24249	ACGAACGCTGGCGGCACGCCTAACACATGCAAGTCGAGCGCACCTTCGGGTGAGCGGCGGACGGGTTAGTAACGCGTGGGAACATACCCTTCTCTAAGGAATAGCCACTGGAAACGGTGAGTAATACCTTATACGCCCTTCGGGGGAAAGATTTATCGGAGATGGATTGGCCCGCGTTAGATTAGATAGTTGGTGGGGTAACGGCCTACCAAGTCTACGATCTATAGCTGGTTTTAGAGGATGATCAGCAACACTGGGACTGAGACACGGCCCAGACTCCTACGGGAGGCAGCAGTGGGGAATCTTAGACAATGGGCGAAAGCCTGATCTAGCCATGCCGCGTGAGTGATGAAGGCCCTAGGGTCGTAAAGCTCTTTCGCCAGGGATGATAATGACAGT…	0	0	0	0	0	0	0	0	0	0.00594694	0	0	0	Bacteria	Proteobacteria	Alphaproteobacteria	Rhodobacterales	Rhodobacteraceae	NA
OTU_24250	TTGAACGCTGGCGGCATGGTTAAAACATGCAAGTCGAACGCGAAAGCACTTCGGTGCGAGTAGAGTGGCGAAAGGGCGAGTAATGCGTATCTAACGTGCCCCGAGGTCAGGGATAGCGGAGAGAAATCTCCGGTAATACCTGATGACCCCGCCGAGCCGCATGGCTTGGCGGGCAAAGGCTTGCTGCCTCGGGATCGGGATACGTGGTATCAGCTTGTTGGTGAGGTAAAGGCTCACCAAGGCTAAGACGCCTAGCGGGGGTGAGAGCACGGCCCGCCGCATCGGGACTGAGACACTGCCCGGACTCCTACGGGAGGCTGCAGTAACGAATATTCCGCAATGCGCGAAAGCGTGACGGAGCAATGCCGCGTGAAGGATGAAGCCCCTCGGGGTGTAAAC…	0	0	0	0	0	0	0	0	0	0.00594694	0	0	0	Bacteria	Planctomycetes	Phycisphaerae	Phycisphaerales	Phycisphaeraceae	NA
OTU_24251	TTGAACGCTGGCGGCATGGTTAAAACATGCAAGTCGAACGATCCCTTCGGGGAGAGTGGCGAAAGGGCTAGGAATACGATCGAACGTACCCCGAGGTGGAGGATAGCGTGTGGAAACGCACGGTAATACTCCATGTCCTCTACGGAGAAAAGGTTTACCGCCTTGGGAGCGGCGATCGTCCTATCAGGTAGTTGGTGAGGTAAAGGCTCACCAAGCCGAAGACGGGTAGCGGGTGTGAGAGCATGACCCGCAGCATCGGAACTGAGACACTGTCCGGACTCCTACGGGAGGCTGCAGTAACGAATCTTCCGCAATGCGCGAAAGCGTGACGGAGCAATGCCGCGTGCAGGATGAAGCGTCTACGACGTGTAAACTGCTGTCAGGGTTTAGGAACAATGA…	0	0	0	0	0	0	0	0	0	0	0.0092068	0	0	Bacteria	Planctomycetes	Phycisphaerae	Phycisphaerales	Phycisphaeraceae	SM1A02
OTU_24252	GTGAACGCTGGCGGCGTGCTTAACACATGCAAGTCGAACGAGAACGGGTTATAGCTTGCTATAACTGTCAGCTAAGTGGCGCACGGGTGAGTAATATATAGGTAACGTGCCCTAGAGAGGGGGATAACAATTGGAAACGATTGCTAATACCCCATATGCCTTTAAGTCATAAGACTGCAAGGGAAATATTTATAGCTCTAGGATCGGCCTGTACGGTATCAGTTTGTTGGTGAGGTAATGGCTCACCAAGACTATGACGCCTAACTGGTTTGAGAGGATGATCAGTCACACTGGAACTGAGACACGGTCCAGACTCCTACGGGAGGCAGCAGTGGGGAATATTGCACAATGGAGGAAACTCTGATGCAGCAACGCCGCGTGGAGGATGACACATTTCGG…	0	0	0	0	0	0	0	0	0	0	0	0.00797546	0	Bacteria	Proteobacteria	Epsilonproteobacteria	Campylobacterales	Campylobacteraceae	Arcobacter
OTU_25175	ACGAACGCTGGCGGCAGGCCTAACACATGCAAGTCAAACGGCTCTTCGGAGCAGTGGCGCACGGGTGCGTAACGCGTGGGAATGTACACCTTGGTAAGGAATAACTGCTGGAAACGGTAGCTAATACCTTATAATGACTCCGGTCCAAAGATTTATCGCCAAGGAATCAGCCCGCGTAAGATTAGATAGTTGGTGAGGTAATGGCTCACCAAGTCTACGATCTTTAGGGGGTCTGAGAGGATGATCCCCCACACTGGTACTGAGACACGGACCAGACTCCTACGGGAGGCAGCAGTGAGGAATATTGCACAATGGAGGAAACTCTGATGCAGCCATGCCGCGTGAGTGATGAAGGCCTTAGGGTTGTAAAGCTCTTTCAATAGTGAAGATAATGACGGT…	0	0.00464396	0	0.00125997	0	0	0	0	0	0	0	0	0	Bacteria	Proteobacteria	Alphaproteobacteria	Alphaproteobacteria_Incertae_Sedis	Unknown_Family	NA
OTU_25176	ACGAACGCTGGCGGCAGGCCTAACACATGCAAGTCGAGCGGGACCTTCGGGTCTAGCGGCGGACGGGTGAGGAACACGTGGGAACATACCTTTCGGTACGGAATAGCCTCGGGAAACTGGGAGTAATACCGTATACGTCCTTAGGGAGAAAGATTTATCGCCGAGAGATTGGCCCGCGTTGGATTAGCTAGTTGGTGGGGTAAGAGCCTACCAAGGCAACGATCTATAGCTGGTTTGAGAGGATGATCAGCCACACTGGGACTGAGACACGGCCCAGACTCCTACGGGAGGCAGCAGTGAGGAATATTGGACAATGGGGGCAACCCTGATCCAGCCATGCCGCGTGAGTGAAGAAGGCCCTAGGGTTGTAAAGCTCTTTCAGATGTGAAGATGATGACC…	0	0	0.0118577	0	0	0	0	0	0	0	0	0	0	Bacteria	Proteobacteria	Alphaproteobacteria	NA	NA	NA
OTU_25179	ACGAACGCTGGCGGCAGGCTTAACACATGCAAGTCGAACGATCCTTCGGGATAGTGGCAGACGGGTGAGTAACACGTGGGAACATACCTAGTGGTACGGAATAACTCAGGGAAACTTGTGTTAATACCGTATACGCCCTTCGGGGGAAAGATTTATCGCCATTGGATTGGCCCGCGTCTGATTAGCTAGTTGGTGAGGTAATGGCTCACCAAGGCTACGATCAGTAGCTGGTCTGAGAGGACGATCAGCCACACTGGGACTGAGACACGGCCCAGACTCCTACGGGAGGCAGCAGTGGGGAATATTGGACAATGGGCGCAAGCCTGATCCAGCCATGCCGCGTGAGTGACGAAGGCCTTAGGGTTGTAAAGCTCTTTTGGCAGGGACGATAATGACGGT…	0	0	0	0	0.00816882	0	0	0	0	0	0	0	0	Bacteria	Proteobacteria	Alphaproteobacteria	Rhizobiales	Hyphomicrobiaceae	NA
OTU_25180	ACGAACGCTGGCGGCACGCCTAACACATGCAAGTCGAGCGCACCTTCGGGTGAGCGGCGGACGGGTTAGTAACGCGTGGGAACATACCCTTTACTACGGAATAGCCTCGGGAAACTGAGAGTAATACCGTATACGCCCTTCGGGGGAAAGATTTATCGGTGAAGGATTGGCCCGCGTTAGATTAGTTAGTTGGTGGGGTAATGGCCTACCAAGACTACGATCTATAGCTGGTTTGAGAGGATGATCAGCAACACTGGGACTGAGACACGGCCCAGACTCCTACGGGAGGCAGCAGTGGGGAATCTTAGACAATGGGGGAAACCCTGATCTAGCGATGCCGCGTGAGTGACGAAGGCCCTAGGGTCGTAAAGCTCTTTCAACTGTGAAGATAATGACGGT…	0	0	0	0	0	0.00811359	0	0	0	0	0	0	0	Bacteria	Proteobacteria	Alphaproteobacteria	Rhodobacterales	Rhodobacteraceae	NA
OTU_25181	ATGAACGCTAGCGGCAGGCCTAATACATGCAAGTCGAACGAGATCTTCGGATCTAGTGGCGCACGGGTGCGTAACGCGTATGCAACTTACCTCAAACTGGGGAATAACTTTTCGAAAGGGGAGCTAATACCGCATAAAAATCAGAGAGGCATCTCTCAAATTTAAAAGGTTACGGTTTGAGATGGGCATGCGTCCCATTAGCTAGTTGGTAGGGTAATGGCTTACCAAGGCTACGATGGGTAGGGGAACTGAGAGGTCGATCCCCCACACTGGTACTGAGATACGGACCAGACTCCTACGGGAGGCAGCAGTAAGGAATATTGGTCAATGGACGAGAGTCTGAACCAGCCATGCCGCGTGCAGGAAGAAGGCGTTCCGCGTCGTAAACTGCTTTTATAT…	0	0	0	0	0	0	0	0.00769724	0	0	0	0	0	Bacteria	Bacteroidetes	Cytophagia	Cytophagales	Cytophagaceae	Microscilla
OTU_25183	ACGAACGCTGGCGGCACGCCTAACACATGCAAGTCGAGCGCACCCTTCGGGGCGAGCGGCGGACGGGTTAGTAACGCGTGGGAACGTACCCAGATCTACGGAATAGCCTCGGGAAACTGAGAGTAATACCGTATACGCCCTTCGGGGGAAAGATTTATCGGATTTGGATCGGCCCGCGTTAGATTAGATAGTTGGTGGGGTAACGGCCTACCAAGTCTACGATCTATAGCTGGTTTTAGAGGATGATCAGCAACACTGGGACTGAGACACGGCCCAGACTCCTACGGGAGGCAGCAGTGGGGAATCTTAGACAATGGGCGAAAGCCTGATCTAGCCATGCCGCGTGAGTGATGAAGGCCCTAGGGTCGTAAAGCTCTTTCGCCAGGGATGATAATGACA…	0	0	0	0	0	0	0	0	0	0.00548948	0	0	0	Bacteria	Proteobacteria	Alphaproteobacteria	Rhodobacterales	Rhodobacteraceae	Roseobacter
OTU_25185	ATGAACGTTGGCGGCATGGATTAGGCATGCAAGTCGAGCGAGAAGAGTCTTTTGCTTGCATTGGACTCGGACAGCGGCGCAAGGGTGAGTAACGCGTAGTTACCTGCCCCCGGGTCCGGAATAGCCATGGGAAACCGTGAGTAATACCGGATAACATCTCAGGATCAAAGGTGAGATTCCGCCCGGGGAGGGGACTGCGTCCTACTAGCTTGTTGGTGGGGTAATGGCCTACCAAGGCTTAGATGGGTAGCGGGCGTGAGAGCGTGGCCCGTCACACTGGGACTGAGACACTGCCCAGACACCTACGGGTGGCTGCAGTCGAGAATCTTCGGCAATGGGCGAAAGCCTGACCGAGCAATGCCGCGTGCGGGATGAAGGCCCTCGGGTTGTAAACCGCGA…	0	0	0	0	0	0	0	0	0	0	0.00849858	0	0	Bacteria	Planctomycetes	Planctomycetacia	Planctomycetales	Planctomycetaceae	Pir4_lineage
OTU_25186	TTGAACGCTGGAGGTATGCTTAACACATGCAAGTCGAACGCGAACGTTTCTTCGGAGACAAGTAGAGTGGCGGACGGGTGAGTAACGCGTAGGAATCTACCTAAGTGTGGGGGATAACATGGAGAAATTCATGCTAATACCGCATACGCCCCACGGGGTAAAGAGGGCCTCTTCTTGAAAGCTCTTGCATTTAGATGAGCCTGCGTCGGATTAGCTTGTTGGCGGGGTAATGGCCCACCAAGGCGACGATCCGTAGCTGGTCTGAGAGGATGATCAGCCACACTGGGACTGAGACACGGCCCAGACTTCTACGGAAGGCAGCAGTGGGGAATTTTCCGCAATGGGCGCAAGCCTGACGGAGCAATACCGCGTGAGGGAAGAATGCCTGAGGGTTGTAAA…	0	0	0	0	0	0	0	0	0	0	0	0.00736196	0	Bacteria	Proteobacteria	Gammaproteobacteria	Arenicellales	Arenicellaceae	Arenicella
OTU_292	ACGAACGCTGGCGGCAGGCCTAACACATGCAAGTCGAACGAGCTCTTCGGAGTTAGTGGCGGACGGGTTAGTAACGCGTGGGAATATGCCCCTGGGTAAGGGACAACAGCTGGAAACGGCTGCTAATACCTTATGATGTCTACGGACCAAAGATTTATCGCCCAGGGATTAGCCCGCGTTGGATTAGGTAGTTGGAGGGGTAACGGCCCACCAAGCCTACGATCCATAGCTGGTTTGAGAGGATGATCAGCAACACTGGGACTGAGACACGGCCCAGACTCCTACGGGAGGCAGCAGTGGGGAATCTTAGACAATGGGGGAAACCCTGATCTAGCCATGCCGCGTGATCGATGACGGCCTTAGGGTTGTAAAGATCTTTCGACGGGGACGATAATGACG…	0	0	0	0.00461991	0	0	0	0	0	0	0	0	0	Bacteria	Planctomycetes	Phycisphaerae	Phycisphaerales	Phycisphaeraceae	NA
OTU_845	GTGAACGCTGGCGGCGTGCCTAACACATGCAAGTCGAACGAGAACGGATTTTAGTTTACTAAAGTTGTCAGCTAAGTGGCGCACGGGTGAGTAATATATAGTTAATCTGCCCCAAAGAAGAGAATAATTGTTGGAAACGACTTGTAATGCTCTATATGCCTTTATGACAAAAGTCAGCAAGGGAAATATTTATAGCTTTGGGATGAGACTGTACGGTATCAGATAGTTGGTGAGGTAATGGCTCACCAAGTCAATGACGCCTAACTGGTTTGAGAGGATGATCAGTCACACTGGAACTGAGACACGGTCCAGACTCCTACGGGAGGCAGCAGTGGGGAATATTGCACAATGGAGGGAACTCTGATGCAGCAACGCCGCGTGGAGGATGACACATTTCGG…	0	0	0	0	0	0	0	0.00705581	0	0	0	0	0	Bacteria	Proteobacteria	Alphaproteobacteria	Rhodobacterales	Rhodobacteraceae	NA
OTU_26160	ACGAACGCTGGCGGCAGGCCTAACACATGCAAGTCGAGCGCACCCTTCGGGGCGAGCGGCGGACGGGTTAGTAACGCGTGGGAATATACCCTTCACTACGGAATAGCCTTTGGAAACGAAGAGTAATACCGTATACGCCCTACGGGGGAAAGATTTATCGGTGAAGGATTAGCCCGCGTTAGATTAGATAGTTGGTGGGGTAATGGCCTACCAAGTCTACGATCTATAGCTGGTTTTAGAGGATGATCAGCAACACTGGGACTGAGACACGGCCCAGACTCCTACGGGAGGCAGCAGTGGGGAATCTTAGACAATGGGCGCAAGCCTGATCTAGCCATGCCGCGTGTGTGATGAAGGCCCTAGGGTCGTAAAGCACTTTCGCTAGGGATGATAATGACA…	0	0.00567595	0	0	0	0	0	0	0	0	0	0	0	Bacteria	Proteobacteria	Alphaproteobacteria	Rhodobacterales	Rhodobacteraceae	Roseicitreum
OTU_26161	ACGAACGCTGGCGGCAGGCTTAACACATGCAAGTCGAGCGCACTCTTCGGAGTGAGCGGCAGACGGGTGAGTAACGCGTGGGAACCTACCTTTAGGTACGGAATAACAGTTAGAAATGACTGCTAATACCGTATGTGCCCGAGAGGGGAAAGATTTATCGCCTAAAGATGGGCCCGCGTTGGATTAGCTAGTTGGTGAGGTAATGGCTCACCAAGGCGACGATCCATAGCTGGTTTGAGAGGATGATCAGCCACACTGGAACTGAGACACGGTCCAGACTCCTACGGGAGGCAGCAGTGGGGAATATTGGACAATGGGGGAAACCCTGATCCAGCCATGCCGCGTGAGTGATGAAGGCCTTAGGGTTGTAAAGCTCTTTCGCTGGGGAAGATAATGACG…	0	0.00567595	0	0	0	0	0	0	0	0	0	0	0	Bacteria	Proteobacteria	Epsilonproteobacteria	Campylobacterales	Campylobacteraceae	Arcobacter
OTU_26164	ACGAACGCTGGCGGCAGGCCTAACACATGCAAGTCGAACGGTCTCTTCGGAGATAGTGGCGGACGGGTTAGTAACGCGTGGGAATATGCCCCTGGGTACGGAACAACAGCTGGAAACGGCTGCTAATACCGTATGATGTCTACGGACCAAAGATTTATCGCCCAGGGATTAGCCCGCGTTGGATTAGGTAGTTGGAGGGGTAACGGCCCACCAAGCCTACGATCCATAGCTGGTTTGAGAGGATGATCAGCAACACTGGGACTGAGACACGGCCCAGACTCCTACGGGAGGCAGCAGTGGGGAATCTTAGACAATGGGGGAAACCCTGATCTAGCCATGCCGCGTGATCGATGACGGCCTTAGGGTTGTAAAGATCTTTCGACGGGGACGATAATGACG…	0	0	0	0	0	0.00743746	0	0	0	0	0	0	0	Bacteria	Proteobacteria	Alphaproteobacteria	Rhodobacterales	Rhodobacteraceae	Sulfitobacter
OTU_26165	ATGAACGCTAGCGGGAGGCTTAATACATGCAAGTCGAAGGACCTTTTCGGAGGGACTGGCGCACGGGTGAGTAACGCGTACACTACCTACCTTTAACAGGGGGACAGCCTTTGGAAACGAAGATTAATACCCCATAGTACCGAGAGGTTAAAGCGTTAGCGGTTAAAGATGGGTGTGCGTGTCATTAGATAGTTGGTAAGGTAACGGCTTACCAAGTCTACGATGACTAGGGGGCGTGAGAGCGTGAACCCCCACACGGGTACTGAGACACGGACCCGACTCCTACGGGAGGCAGCAGTAAGGAATATTGGACAATGGGCGGAAGCCTGATCCAGCCATCCCGCGTGTAGGATGACTGCCCTATGGGTTGTAAACTACTTTTGTACGAGAAGAAACGCC…	0	0	0	0	0	0	0	0.00705581	0	0	0	0	0	Bacteria	Proteobacteria	Alphaproteobacteria	Rhizobiales	Phyllobacteriaceae	Cohaesibacter
OTU_26166	ACGAACGCTGGCGGCAGGCCTAACACATGCAAGTCGAGCGCACCTTCGGGTGAGCGGCGGACGGGTTAGTAACGCGTGGGAATATGCCCTTCTCTGCGGAATAGCCTCTGGAAACGGAGAGTAATACCGCATACGCCCTTCGGGGGAAAGATTTATCGGAGAAGGATTAGCCCGCGTTAGATTAGGTAGTTGGTGGGGTAATGGCCTACCAAGCCTACGATCTATAGCTGGTTTTAGAGGATGATCAGCAACACTGGGACTGAGACACGGCCCAGACTCCTACGGGAGGCAGCAGTGGGGAATCTTAGACAATGGGGGAAACCCTGATCTAGCCATGCCGCGTGAGTGATGAAGGCCCTAGGGTCGTAAAGCTCTTTCGCCAGGGATGATAATGACAGT…	0	0	0	0	0	0	0	0	0	0	0.00779037	0	0	Bacteria	Proteobacteria	Alphaproteobacteria	Rhodobacterales	Rhodobacteraceae	NA
OTU_26168	TTGAACGCTGGCGGCATGGCTAAAACATGCAAGTCGAACGAGAAAGTCACTTCGGTGGCGAGTACAGTGGCGAAAGGGCGAGTAATGCATGCCTACGTACCCCAAGGTGAGGGATAGCTCACCGAAAGGTGTGGTAATACCTCATAATCTCGAAAGAGCAAAGGTTTACTGCCTTGGGATCGGGGCATGTCCTATCAGGTTGTTGGTGAGGTAACGGCTCACCAAGCCAAAGACGGGTAGCGGGTGTGAGAGCATGACCCGCCGCATCGGGACTGAGACACTGCCCGGACTCCTACGGGAGGCTGCAGTAACGAATATTCCGCAATGCACGAAAGTGTGACGGAGCAATGCCGCGTGAAGGTTAAGCCCCTCGGGGTGTAAACTTCTGTCAGGGTTTAG…	0	0	0	0	0	0	0	0	0	0	0	0.00674847	0	Bacteria	Bacteroidetes	Sphingobacteriia	Sphingobacteriales	Saprospiraceae	NA
OTU_26169	ACGAACGCTGGCGGCAGGCCTAACACATGCAAGTCGAGCGCACCTTCGGGTGAGCGGCGGACGGGTGAGTAACGCGTGGGAATATGCCCTTCTCTGCGGAATAGCCTTTGGAAACGAAGAGTAATACCGCATACGCCCTTCGGGGGAAAGATTTATCGGAGAGGGATTAGCCCGCGTTAGATTAGGTAGTTGGTGGGGTAATGGCCTACCAAGCCTACGATCTATAGCTGGTTTTAGAGGATGATCAGCCACACTGGGACTGAGACACGGCCCAGACTCCTACGGGAGGCAGCAGTGGGGAATCTTAGACAATGGGGGAAACCCTGATCTAGCCATGCCGCGTGAGTGATGAAGGCCCTAGGGTCGTAAAGCTCTTTCGCCAGGGATGATAATGACAGT…	0	0	0	0	0	0	0	0	0	0	0	0.00674847	0	Bacteria	Proteobacteria	Alphaproteobacteria	Rhodobacterales	Rhodobacteraceae	NA
OTU_4555	ACGAACGCTGGCGGCAGGCCTAACACATGCAAGTCGAACGGTCTCTTCGGAGATAGTGGCGAACGGGTGAGTAACACGTGGGAACATGCCCCTGGGTACGGAACAACAGCTGGAAACGGCTGCTAATACCGTATGATGACTTCGGTCCAAAGATTTATCGCCCAGGGATTGGCCCGCGTTGGATTAGATAGTTGGTGGGGTAACGGCCTACCAAGTCTGCGATCCATAGCTGGTCTTAGAGGATGATCAGCCACACTGGGACTGAGACACGGCCCAGACTCCTACGGGAGGCAGCAGTGGGGAATCTTAGACAATGGGCGCAAGCCTGATCTAGCCATGCCGCGTGATCGATGACGGCCTTAGGGTTGTAAAGATCTTTCGACGGGGACGATAATGACG…	0	0	0	0	0	0	0	0	0	0	0.00708215	0	0	Bacteria	Proteobacteria	Alphaproteobacteria	Rhodospirillales	Rhodospirillaceae	NA
OTU_27244	ACGAACGCTGGCGGCAGGCCTAACACATGCAAGTCGAACGCTCCCTTCGGGGAGAGTGGCGCACGGGTGCGTAACGCGTGGGAACCTACCCTTTAGTAAGGAACAACGTTTGGAAACGAACGCTAATACCTTATACGCCCTTCGGGGGAAAGATTTATCGCTAAAGGATGGGCCCGCGTTAGATTAGGTAGTTGGTGAGGTAATGGCTCACCAAGCCTACGATCTATAGCTGGTCTGAGAGGATGATCAGCCACACTGGAACTGAGACACGGTCCAGACTCCTACGGGAGGCAGCAGTGGGGAATATTGGACAATGGGGGCAACCCTGATCCAGCCATGCCGCGTGCAGGATGAAGGCCTTCGGGTTGTAAACTGCTTTTACCAGGGAACAAAAAGCCC…	0.0109051	0	0	0	0	0	0	0	0	0	0	0	0	Bacteria	Proteobacteria	Alphaproteobacteria	Parvularculales	Parvularculaceae	NA
OTU_27245	ATGAACGCTGGCGGCGTGCTTAACACATGCAAGTCGAACGAACCCGACCTTCGGGTCATATGGGTGAGTGGCGAACGGGTGAGTAACACGTGAGAAACCTGCCCCAAAGTTCGGAATAACTCAGGGAAACTTGAGCTAATACCGGATGCCCTCCATTGGTCGAATGGCCGATGGAGGAAAGATTTATCGCTTTGGGAGGGTCTCGCGGCCTATCAGCTTGTTGGTGAGGTAATGGCTCACCAAGGCATTGACGGGTAGCTAGTCTGAGAGGACGAATAGCCACACTGGGACTGAGACACGGCCCAGACTCCTACGGGAGGCAGCAGTGGGGAATCTTGCACAATGGGCGAAAGCCTGATGCAGCGACGCCGCGTGGGGGATGAAGGCCCTAGGGTCGTA…	0	0.00515996	0	0	0	0	0	0	0	0	0	0	0	Bacteria	Proteobacteria	Alphaproteobacteria	NA	NA	NA
OTU_27246	ATGAACGCTAGCGGCAGGCTTAATACATGCAAGTCGAACGGCAGCATGCACTTCGGTGTGATGGCGAGTGGCGCACGGGTGAGTAACGCGTACAAAATCTACCTTCTACAGGGGGAAAGTCGCTGGAAACGGCGAATAATCCCGCATAAGACTACAGTATCGCATGGTACAGGAGTTAAAGGAGAGATCTGGTAGAAGATGATTGTGCGTTCCATTAGCTAGTTGGTGTGGTAACGGCATACCAAGGCGACGATGGGTAGGGGGCGTGAGAGCGTGATCCCCCACACGGGTACTGAGACACGGACCCGACTCCTACGGGAGGCAGCAGTGGGGAATCTTCGGCAATGGGGGCAACCCTGACCGAGCCATGCCGCGTGAGTGATGAAGGCCTTAGGGTCG…	0	0.00257998	0	0	0	0	0	0.00320718	0	0	0	0	0	Bacteria	Actinobacteria	Acidimicrobiia	Acidimicrobiales	NA	NA
OTU_27247	TTGAACGCTGGCGGCAGGCCTAACACATGCAAGTCGAGCGAGAAAGCCTTCGGGTGAGTAGAGCGGCGGACGGGTGAGTAACGCGTGGGAATCTACCCAGTAGCGGGGGACAACAGTTGGAAACGGCTGCTAATACCGCATACGCCCTACGGGGGAAAGCAGGGGATCTTCGGACCTTGCACTATTGGATGAGCCCGCGTTAGATTAGCTAGATGGTGGGGTAAAGGCCTACCATGGCGACGATCTATAGCTGGTCTGAGAGGATGATCAGCCACACTGGAACTGAGACACGGTCCAGACTCCTACGGGAGGCAGCAGTGGGGAATATTGGGCAATGGGCGCAAGCCTGACCCAGCCATGCCGCGTGTGTGAAGAAGGCTCTAGGGTTGTAAAGCTCTT…	0	0	0	0.00419992	0	0	0	0	0	0	0	0	0	Bacteria	Bacteroidetes	Sphingobacteriia	Sphingobacteriales	Saprospiraceae	Aureispira
OTU_27248	ACGAACGCTGGCGGCACGCCTAACACATGCAAGTCGAGCGCTACCTTCGGGTGGAGCGGCGGACGGGTTAGTAACGCGTGGGAACATACCCTTTTCTGCGGAATAGCCTTTGGAAACGAAGAGTAATACCGCATACGCCCTTCGGGGGAAAGATTTATCGGTGAAGGATTGGCCCGCGTAAGATTAGATAGTTGGTGGGGTAACGGCCTACCAAGTCGACGATCTTTAGCTGGTTTGAGAGGATGATCAGCAACACTGGGACTGAGACACGGCCCAGACTCCTACGGGAGGCAGCAGTGGGGAATCTTAGACAATGGGCGAAAGCCTGATCTAGCGATGCCGCGTGAGTGATGAAGGTCTTAGGATCGTAAAGCTCTTTCGCCAGAGATGATAATGACA…	0	0	0	0.00419992	0	0	0	0	0	0	0	0	0	Bacteria	Proteobacteria	Gammaproteobacteria	Cellvibrionales	Cellvibrionaceae	Candidatus_Endobugula
OTU_27249	ACGAACGCTGGCGGAAGGCTTAACACATGCAAGTCGAGCGCTCACTTTTGTGGGAGCGGCAGACGGGTGAGTAACGCGTGGGGATCTACCCAGTACTAGGGAATAACACAGAGAAATTTGTGCTAATGCCTTATACGCCCTTAGGGGGAAAGATTTATCGGTATTGGATGAACCCGCGTTTGATTAGCTAGTTGGTGAGGTAATGGCTCACCAAGGCTACGATCAATAGCTGGTCTGAGAGGATGATCAGCCACACTGGGACTGAGACACGGCCCAGACTCCTACGGGAGGCAGCAGTGGGGAATATTGGACAATGGGCGCAAGCCTGATCCAGCCATTCCGCGTGAGTGATGACGGCCTTAGGGTTGTAAAGCTCTTTCAACGGTGAAGATAATGACG…	0	0	0	0	0.00680735	0	0	0	0	0	0	0	0	Bacteria	Proteobacteria	Alphaproteobacteria	Rhodobacterales	Rhodobacteraceae	Jannaschia
OTU_27251	ACGAACGCTGGCGGCAGGCCTAACACATGCAAGTCGAACGAACCTTTTAGGTGAGTGGCGCACGGGTGCGTAACGCGTGGGAATATACCCTTGAGTAAGGAATAACTGCTGGAAACGGTAGCTAATACCTTATAATGACTTCGGTCCAAAGATTTATCGCTCAAGGATTAGCCCGCGTTAGATTAGATAGTTGGTGAGGTAATGGCTCACCAAGTCGACGATCTATAGGGGGTCTGAGAGGATGATCCCCCACACTGGTACTGAGACACGGACCAGACTCCTACGGGAGGCAGCAGTGAGGAATATTGGACAATGGGGGCAACCCTGATCCAGCCATGCCGCGTGTATGAAGAAGGCCTTAGGGTTGTAAAGTACTTTCAAACGTGAAGATAATGACGG…	0	0	0	0	0.00680735	0	0	0	0	0	0	0	0	Bacteria	Proteobacteria	Alphaproteobacteria	Rhizobiales	Phyllobacteriaceae	NA
OTU_27252	ACGAACGCTGGCGGCAGGCTTAACACATGCAAGTCGAACGCCCTCTTCGGAGGGAGTGGCAGACGGGTGAGTAACGCGTGGGGAACTACCTATCAGTACGGAACAACAGTTAGAAATGACTGCTAATACCGTATACGTCCTTAGGGAGAAAGATTTATCGCTGATAGATGTACCCGCGTTAGATTAGCTAGTTGGTGAGGTAATGGCTCACCAAGGCGACGATCTATAGCTGGTCTGAGAGGATGATCAGCCACACTGGAACTGAGACACGGTCCAGACTCCTACGGGAGGCAGCAGTGGGGAATATTGGACAATGGGCGCAAGCCTGATCCAGCCATGCCGCGTGAGTGATGAAGGCCTTAGGGTTGTAAAGCTCTTTCAACGGTGAAGATAATGACG…	0	0	0	0	0	0.00676133	0	0	0	0	0	0	0	Bacteria	Proteobacteria	Alphaproteobacteria	Alphaproteobacteria_Incertae_Sedis	Unknown_Family	NA
OTU_27253	ACGAACGCTGGCGGCAGGCTTAACACATGCAAGTCGAACGAGAAACTTACTTCGGTAAGTGGACAGTGGCAGACGGGTGAGTAACGCGTGGCAACCTACCTTTTTCTACGGAACAACAGTTGGAAACGACTGCTAATACCGTATACGCCCTCCGGGGGAAAGATTTATCGGTGAAAGATGGGGCCGCGTTAGATTAGCTAGTTGGTAAGGTAATGGCTTACCAAGGCGACGATCTATAGCTGGTCTGAGAGGATGATCAGCCACACTGGGACTGAGACACGGCCCAGACTCCTACGGGAGGCAGCAGTGGGGAATATTGGACAATGGGGGCAACCCTGATCCAGCCATGCCGCGTGAATGATGAAGGCCTTAGGGTTGTAAAATTCTTTCGCTAGGGAT…	0	0	0	0	0	0	0.00800641	0	0	0	0	0	0	Bacteria	Proteobacteria	Alphaproteobacteria	Rhizobiales	Phyllobacteriaceae	NA
OTU_27255	ACGAACGCTGGCGGCAGGCCTAACACATGCAAGTCGAGCGGACCTTCGGGTTAGCGGCGGACGGGTGAGTAACGCGTGGGAATATGCCTCTGGGTAAGGAACAACAACTGGAAACGGTTGCTAATGCCTTATGATGTCTTCGGACCAAAGATTTATCGCCCAGAGATTGGCCCGCGTTGGATTAGGTAGTTGGTGGGGTAACGGCCCACCAAGCCGACGATCCATAGCTGGTTTGAGAGGATGATCAGCCACACTGGGACTGAGACACGGCCCAGACTCCTACGGGAGGCAGCAGTGGGGAATCTTGGACAATGGGGGAAACCCTGATCCAGCCATGCCGCGTGAGCGATGACGGCCTTAGGGTTGTAAAGCTCTTTCACCGGTGACGATAATGACGGT…	0	0	0	0	0	0	0	0	0.0111732	0	0	0	0	Bacteria	Proteobacteria	Alphaproteobacteria	Caulobacterales	Hyphomonadaceae	Hellea
OTU_27256	ACGAACGCTGGCGGCAGGCCTAACACATGCAAGTCGAACGATGCCTTGGGCTTCGGCTCAAGGGATAGTGGCGCACGGGTGAGTAACACGTGGGAACCTGCCTTTCGGTACGGGATAACCGCTGGAAACGGCGGCTAATACCGTATGTTCCCGGATGATGTGGTGTTGTCCGGGTAAAGATTTATCGCCGAGAGATGGGCCCGCGGCCGATTAGCTTGTTGGTGGGGTAACGGCCTACCAAGGCTGCGATCGGTAGCTGGTCTGAGAGGATGATCAGCCACACTGGGACTGAGACACGGCCCAGACTCCTACGGGAGGCAGCAGTGGGGAATATTGGACAATGGGGGCAACCCTGATCCAGCCATGCCGCGTGAGTGACGAAGGCCTTAGGGTTGTAAA…	0	0	0	0	0	0	0	0	0	0	0	0.00613497	0	Bacteria	Proteobacteria	Alphaproteobacteria	Rhodobacterales	Rhodobacteraceae	NA
OTU_28461	ACGAACGCTGGCGGCACGCTTAACACATGCAAGTCGAACGAACTCTTCGGAGTGAGTGGCAGACGGGTGCGTAACACGTGGGAACCAACCTTGTAGTTCGGAATAACAGTTAGAAATGACTGCTAATACCGTATAATCCCTTCGGGGCAAAGATTTATCGCTATAAGACGGGCCCGCGGCTGATTAGTTTGTTGGTGGGGTAAAAGCCTACCAAGACTACGATCAGTAGCTGGTCTGAGAGGATGATCAGCCACACTGGAACTGAGACACGGTCCAGACTCCTACGGGAGGCAGCAGTGGGGAATATTGGACAATGGGCGAAAGCCTGATCCAGCGATGCCGCGTGAATGATGAAGGCCTTAGGGTTGTAAAATTCTTTCGATGGTGAAGATAATGACG…	0.00981461	0	0	0	0	0	0	0	0	0	0	0	0	Bacteria	Proteobacteria	Alphaproteobacteria	Parvularculales	Parvularculaceae	Parvularcula
OTU_28464	ACGAACGCTGGCGGCAGGCTTAACACATGCAAGTCGAACGATCCTTCGGGATAGTGGCAGACGGGTGAGTAACGCGTGGGAACCTACCTAGTAGTACGGAATAACAGTTAGAAATGACTGCTAATACCGTATACGCCCTTTTGGGGAAAGATTTATCGCTATTAGATGGGCCCGCGTTAGATTAGCTAGTTGGTGAGGTAATGGCTCACCAAGGCGACGATCTATAGCTGGTCTGAGAGGATGATCAGCCACACTGGGACTGAGACACGGCCCAGACTCCTACGGGAGGCAGCAGTGGGGAATATTGGACAATGGGGGCAACCCTGATCCAGCCATGCCGCGTGTGTGATGAAGGCCCTAGGGTTGTAAAGCACTTTCAACGGTGAAGATAATGACGGT…	0	0	0	0.00377992	0	0	0	0	0	0	0	0	0	Bacteria	Proteobacteria	Alphaproteobacteria	Rhizobiales	Phyllobacteriaceae	Hoeflea
OTU_28465	ACGAACGCTGGCGGCAGGCCTAACACATGCAAGTCGAACGATCCTTCGGGATAGTGGCAGACGGGTGAGTAACGCGTGGGAACCTTCCCTATGGTACGGAATAGCTCCGGGAAACTGGAATTAATACCGTATAAGCCCTTCGGGGGAAAGATTTATCGCCATAGGATGGGCCCGCGTCGGATTAGCTAGTTGGTAGGGTAACGGCCTACCAAGGCAACGATCCGTAGCTGGTCTTAGAGGATGATCAGCCACACTGGGACTGAGACACGGCCCAGACTCCTACGGGAGGCAGCAGTGGGGAATATTGGACAATGGGCGAAAGCCTGATCCAGCCATGCCGCGTGAGTGACGAAGGCCTTAGGGTTGTAAAACTCTTTTGGCGGGGACGATAATGACGGT…	0	0	0	0	0.00612662	0	0	0	0	0	0	0	0	Bacteria	Proteobacteria	Alphaproteobacteria	Rhizobiales	Hyphomicrobiaceae	Filomicrobium
OTU_28466	ACGAACGCTGGCGGCAGGCCTAACACATGCAAGTCGCAGGGGAAGCCTTCCTTCGGGGAGGTGGAGACTGGCGCACGGGTGAGTAACGCGTGGGGATTTACCCCGGGGTGGGGAATAACCGCTGGAAACGGCGGCTAATACCGCATACGTCCGAGAGGAGAAAGTCTTAGGGCGCCCTGGGAGGAACCCGCGTTGGATTAGCTAGTTGGTGGGGTAAAAGCCTACCAAGGCGACGATCCATAGCTGGTCTGAGAGGATGATCAGCCACACTGGGACTGAGACACGGCCCAGACTCCTACGGGAGGCAGCAGTGGGGAATATTGGACAATGGGCGCAAGCCTGATCCAGCCATGCCGCGTGAGTGAAGAAGGCCTTAGGGTTGTAAAACTCTTTCACCCG…	0	0	0	0	0	0	0	0.00577293	0	0	0	0	0	Bacteria	Proteobacteria	Alphaproteobacteria	Rhodospirillales	Rhodospirillaceae	NA
OTU_28467	ACGAACGCTGGCGGCAGGCCTCATACATGCAAGTCGAGCGCGCCTTCGGGTGAGCGGCGGACGGGTGAGTAACGCGTGGGAATGTGCCCTTCACTGCGGAATAGCCTTGGGAAACCGAGAATAATACCGCATACGCCCTTTGGGGGAAAGATTTATTCGGTGAAGGATCGGCCCGCGTTGGATTAGGTAGTTGGTGGGGTAAGAGCCTACCAAGCCTACGATCCATAGCTGGTTTGAGAGGATGATCAGCCACACTGGGACTGAGACACGGTCCAGACTCCTACGGGAGGCAGCAGTAGGGAATCTTGGACAATGGGGGAAACCCTGATCCAGCCATGCCGCGTGAGTGACGAAGGCCCTAGGGTCGTAAAGCTCTTTCGCCAGGGAAGATAATGACGG…	0	0	0	0	0	0	0	0.00577293	0	0	0	0	0	Bacteria	Proteobacteria	Alphaproteobacteria	Rhodobacterales	Rhodobacteraceae	NA
OTU_28469	ACGAACGCTGGCGGCAGGCCTAACACATGCAAGTCGAACGGATCCTTCGGGATTAGTGGCGCACGGGTGAGTAACGCGTGGGAACCTGTCCACCGGTACGGGACAACCCGGGGAAACTCGGGCTAATACCGTATACGCCTTGCGAGGGAAAGAACTTCGCCGGGGGGTGGGCCCGCGTCCGATTAGCTAGTTGGTGGGGTAACGGCCTACCAAGGCTGCGATCGGTAGCTGGTCTGAGAGGATGATCAGCCACACTGGAACTGAGACACGGTCCAGACTTCTACGGAAGGCAGCAGTGGGGAATATTGGACAATGGGCGCAAGCCTGATCCAGCCATGCCGCGTGAGCGATGAAGGCCTTAGGGTTGTAAAGCTCTTTCGCCAGGGATGATAATGACAG…	0	0	0	0	0	0	0	0	0	0	0	0.00552147	0	Bacteria	Proteobacteria	Alphaproteobacteria	NA	NA	NA
OTU_28471	ACGAACGCTGGCGGCAGGCTTAACACATGCAAGTCGAGCGCCCACTTCGGTGGGAGCGGCAGACGGGTGAGTAACGCGTGGGAATATACCTATCTCTAGGGAACAACAGTTGGAAACGACTGCTAATGCCTTATACGCCCTTCGGGGGAAAGATTTATCGGAGATAGATTAGCCCGCGTTAGATTAGCTAGTTGGTGAGGTAATGGCTCACCAAGGCGACGATCTATAGCTGGTCTGAGAGGATGATCAGCCACACTGGAACTGAGACACGGTCCAGACTCCTACGGGAGGCAGCAGTGGGGAATATTGGACAATGGGCGCAAGCCTGATCCAGCCATGCCGCGTGAGTGATGAAGGCCTTAGGGTTGTAAAGCTCTTTCAACGGTGAAGATAATGACG…	0	0	0	0	0	0	0	0	0	0	0	0	0.0173077	Bacteria	Proteobacteria	Alphaproteobacteria	Rhizobiales	Phyllobacteriaceae	NA
OTU_19409	ACGAACGCTGGCGGCAGGCTTAACACATGCAAGTCGAACGCCCTCTTCGGAGGGAGTGGCAGACGGGTGAGTAACGCGTGGGAACCTACCTAATAGTAAGGAACAACAGTTGGAAACGACTGCTAATACCTTATACGCCCTTCGGGGGAAAGATTTATCGCTATTAGATGGGCCCGCGTTAGATTAGCTAGTTGGTGAGGTAATGGCTCACCAAGGCGACGATCTATAGCTGGTCTGAGAGGATGATCAGCCACACTGGAACTGAGACACGGTCCAGACTCCTACGGGAGGCAGCAGTGGGGAATATTGGACAATGGGCGCAAGCCTGATCCAGCCATGCCGCGTGAGTGATGAAGGCCCTAGGGTTGTAAAGCTCTTTCAACGGTGAAGATAATGACG…	0	0	0	0	0	0	0	0	0	0.00365965	0	0	0	Bacteria	Proteobacteria	Alphaproteobacteria	Rhizobiales	Phyllobacteriaceae	NA
OTU_29679	ACGAACGCTGGCGGCAGGCTTAACACATGCAAGTCGAACGAACTCTTCGGAGTGAGTGGCAGACGGGTGCGTAACACGTGGGAACCTACCTTAAGGTACGGAATAACATCGAGAAATCGTTGCTAATACCGTATGTGCCCTTCGGGGGAAAGATTTATCGCCTTAAGATGGGCCCGCGGCAGATTAGATAGTTGGTGGGGTAAAAGCCTACCAAGTCTACGATCTGTAGCTGGTCTGAGAGGATGATCAGCCACACTGGAACTGAGACACGGTCCAGACTCCTACGGGAGGCAGCAGTGGGGAATATTGGGCAATGGGCGCAAGCCTGACCCAGCCATGCCGCGTGTGTGAAGAAGGCTCTAGGGTTGTAAAGCACTTTAAGTAGGGAGGAAAGGGTGT…	0.00109051	0	0.00197628	0.000839983	0	0	0	0	0	0.000914913	0	0	0.00192308	Bacteria	Proteobacteria	Alphaproteobacteria	Parvularculales	Parvularculaceae	Parvularcula
OTU_29680	ACGAACGCTGGCGGCAGGCCTAACACATGCAAGTCGAAGGAGAAGTTTCTCTTCGGAGAGATAGACACTGGCGCACGGGTGAGTAACGCGTGGGAATCTACCCCGGGGTGGGGGACAACCGCTGGAAACGGCGGCTAATACCGCATACGCCTTGAGAGGGAAAGCTTTAGCGCCCTGGGATGAGCCCGCGTTAGATTAGGTAGTTGGTGGGGTAACGGCCTACCAAGCCTTCGATCTATAGCTGGTCTGAGAGGATGATCAGCCACACTGGGACTGAGACACGGCCCAGACTCCTACGGGAGGCAGCAGTGGGGAATATTGGACAATGGGGGCAACCCTGATCCAGCCATGCCGCGTGCGTGAAGAAGGCCTTAGGGTTGTAAAGCGCTTTCACTGGTG…	0	0.00412797	0	0	0	0	0	0	0	0	0	0	0	Bacteria	Proteobacteria	Alphaproteobacteria	Rhodospirillales	Rhodospirillaceae	Pelagibius
OTU_29681	ACGAACGCTGGCGGCAGGCCTAACACATGCAAGTCGAGCGCATCCTTCGGGATGAGCGGCGGACGGGTTAGTAACGCGTGGGAACGTACCCAGATCTAAGGAATAGCCACTGGAAACGGTGAGTAATACCTTATACGCCCTTCGGGGGAAAGATTTATCGGATTTGGATCGGCCCGCGTTAGATTAGATAGTTGGTGGGGTAATGGCCTACCAAGTCTACGATCTATAGCTGGTTTGAGAGGATGATCAGCAACACTGGGACTGAGACACGGCCCAGACTCCTACGGGAGGCAGCAGTGGGGAATCTTGGACAATGGGCGCAAGCCTGATCCAGCCATGCCGCGTGAGTGACGAAGGCCTTAGGGTCGTAAAGCTCTTTCGCCTGTGAAGATAATGACG…	0	0	0.00790514	0	0	0	0	0	0	0	0	0	0	Bacteria	Proteobacteria	Alphaproteobacteria	Rhodobacterales	Rhodobacteraceae	Thalassobius
OTU_29683	ATGAACGCTGGCGGCAGGCCTAACACATGCAAGTCGAGCGAGAACGGTACTTCGGTACTTATTAGAGCGGCAAACGGGTGAGTAACACGTGGGAATATACCTTTCGGTCCGGAATAGCCCTTGGAAACGAGGATTAATGCTGGATACGCATTACGATGGAAAGATTTATCGCCGAAAGATTAGCCCGCGCTAGATTAGATAGTTGGTGAGGTAATGGCTCACCAAGTCTACGATCTATAGCTGGTTTGAGAGGATGATCAGCCACATTGGGACTGAGATACGGCCCAGACTCCTACGGGAGGCAGCAGTGAGGAATATTGCACAATGGAGGAAACTCTGATGCAGCCATGCCGCGTGAGTGATGAAGGCCCTAGGGTTGTAAAACTCTTTCGCCAGGGA…	0	0	0	0.00335993	0	0	0	0	0	0	0	0	0	Bacteria	Proteobacteria	Alphaproteobacteria	NA	NA	NA
OTU_29685	ATGAACGCTAGCGGGAGGCTTAATACATGCAAGTCGAACGGCAGCATTTCGGATGGCAAGTGGCGAACGGGTGAGTAACGCGTACAGATCTGCCTTATACTAGAGAATAGCCCTGGGAAACTGGGAGTAATACTCTATGTGGTCGAAGGACTAAAGCTACGGCGGTATAAGATGACTGTGCGTCTGATTAGCTAGTTGGTGAGGTAGAGGCTCACCAAGGCGACGATCAGTAGGGGGCGTGAGAGCGTGATCCCCCACACGGGTACTGAGACACGGACCCGACTCCTACGGGAGGCAGCAGTAAGGAATATTGGGCAATGGAGGCAACTCTGACCCAGCCATCCCGCGTGTAGGATGAAGGCGCTACGCGTTGTAAACTACTTTTATTTGGGACGAAAA…	0	0	0	0	0.00544588	0	0	0	0	0	0	0	0	Bacteria	Bacteroidetes	Sphingobacteriia	Sphingobacteriales	Saprospiraceae	Lewinella
OTU_29686	ACGAACGCTGGCGGCAGGCCTAACACATGCAAGTCGAACGAACCCTTCGGGGTGAGTGGCGCACGGGTGCGTAACGCGTGGGAATATACCCTTAGGTAAGGAACAACGTCTGGAAACGGACGCTAATACCTTATAATGACTTCGGTCCAAAGATTTATCGCCTAGGGATTAGCCCGCGTCTGATTAGTTAGTTGGTGAGGTAACGGCTCACCAAGACGATGATCAGTAGCTGGTCTGAGAGGATGATCAGCCACACTGGAACTGAGACACGGTCCAGACTCCTACGGGAGGCAGCAGTGAGGAATATTGGACAATGGGGGCAACCCTGATCCAGCCATGCCGCGTGAGTGAAGAAGGCCTTAGGGTTGTAAAGCTCTTTCAATTGTGAAGATAATGACG…	0	0	0	0	0.00544588	0	0	0	0	0	0	0	0	Bacteria	Proteobacteria	Alphaproteobacteria	Alphaproteobacteria_Incertae_Sedis	Unknown_Family	NA
OTU_29687	TCGAACGCTGGCGGCATGGCTAAAACATGCAAGTCGAACGAGAAGCCCCTTCGGGGGTGGACAGTGGCGAAAGGGCGAGTAATGCATATCTAACGTGCCCCTGAGTCGGGGATAGCAGAGGGAAACTTCTGGTAATACCCGATTACAACGGTAGTCCGCATGGTCGGCCGTTCAAAGATTTATCGCTCAGGGATCGGGATATGTCCTATCAGCTTGTTGGTGAGGTAATGGCTCACCAAGGCGAAGACGGGTAGCGGGTGTGAGAGCATGACCCGCCGCATCGGGACTGAGACACTGCCAGGACTCCTACGGGAGGCTGCAGTAACGAATATTCCGCAATGCGCGAAAGCGTGACGGAGCAATGCCGCGTGCAGGACGAAGCCCCTCGGGGTGTAAACT…	0	0	0	0	0	0.00540906	0	0	0	0	0	0	0	Bacteria	Planctomycetes	Phycisphaerae	Phycisphaerales	Phycisphaeraceae	Phycisphaera
OTU_29688	ATGAACGCTAGTAGTATGCTTAACACATGCAAGTCGAACGAACATTTTTTCGTGGCGAACGGGTGAGTATTCACAGAATTTTCCCTTTTAGTTCAGAACAAAGATTTACTTGATTAAATTTAAATACTGAATAGTTTTAAAGGTTAATTCCGCTGAAAGATAAATCTGTATAAGATTAGGTTGTTGGTAGGTTAAAAGCTTACCAAGCCTACGATCTTTAGTTGATTCTAGAGGATGATCAACCACACTGGAACTGAAATAAGGTCCAGGCTGACACGTCGGCCAGCAGTGAGGAATATTGGACAATGAACGAAAGTTTGATCCAGCAATACTACCTGGGTGATGACGGCTTATTTAAGTTGTAAGATCCTTTGATTAAAGAAGATAATGACATTATTT…	0	0	0	0	0	0.00540906	0	0	0	0	0	0	0	Bacteria	Proteobacteria	Alphaproteobacteria	Rickettsiales	Mitochondria	NA
OTU_29689	ACGAACGCTGGCGGCAGGCCTAACACATGCAAGTCGAGCGCACCTTCGGGTGAGCGGCGGACGGGTTAGTAACGCGTGGGAACGTACCTTTCGGTAAGGAATAGCCACTGGAAACGGTGAGTAATACCTTATACGCCCTTCGGGGGAAAGATTTATCGCCGAGAGATCGGCCCGCGTTAGATTAGGTAGTTGGTGGGGTAATGGCCTACCAAGCCTACGATCTATAGCTGGTTTTAGAGGATGATCAGCAACACTGGGACTGAGACACGGCCCAGACTCCTACGGGAGGCAGCAGTGGGGAATCTTAGACAATGGGGGAAACCCTGATCTAGCCATGCCGCGTGAGTGATGAAGGCCCTAGGGTCGTAAAGCTCTTTCGCCAGGGATGATAATGACAGT…	0	0	0	0	0	0	0.00640512	0	0	0	0	0	0	Bacteria	Proteobacteria	Alphaproteobacteria	Rhodobacterales	Rhodobacteraceae	Aestuariivita
OTU_29690	ACGAACGCTGGCGGCAGGCCTAACACATGCAAGTCGAGCGCACCTTCGGGTGAGCGGCGGACGGGTTAGTAACGCGTGGGAATATACCCTTCTCTGCGGAATAGCCTCTGGAAACGGAGAGTAATACCGCATACGCCCTTCGGGGGAAAGATTTATCGGAGAAGGATTAGCCCGCGTTAGATTAGGTAGTTGGTGGGGTAATGGCCTACCAAGCCTACGATCTATAGCTGGTTTTAGAGGATGATCAGCAACACTGGGACTGAGACACGGCCCAGACTCCTACGGGAGGCAGCAGTGGGGAATCTTAGACAATGGGGGAAACCCTGATCTAGCCATGCCGCGTGAGTGATGAAGGCCCTAGGGTCGTAAAGCTCTTTCGCCAGGGATGATAATGACAGT…	0	0	0	0	0	0	0.00640512	0	0	0	0	0	0	Bacteria	Proteobacteria	Alphaproteobacteria	Rhodobacterales	Rhodobacteraceae	NA
OTU_29691	ACGAACGCTGGCGGCAGGCCTAACACATGCAAGTCGAACGGATCCTTCGGGATTAGTGGCGCACGGGTGAGTAACGCGTGGGAACCTGTCCTCCGGTACGGGACAACCCGGGGAAACTCGGGCTAATACCGTATACGCCTTGCGAGGGAAAGAACTTCGCCGGGGGGTGGGCCCGCGTCCGATTAGCTAGTTGGTGGGGTAACGGCCTACCAAGGCTGCGATCGGTAGCTGGTCTGAGAGGATGATCAGCCACACTGGAACTGAGACACGGTCCAGACTTCTACGGAAGGCAGCAGTGGGGAATATTGGACAATGGGCGCAAGCCTGATCCAGCCATGCCGCGTGAGCGATGAAGGCCTTAGGGTTGTAAAGCTCTTTCACCGGCGACGATGATGACGG…	0	0	0	0	0	0	0	0.00513149	0	0	0	0	0	Bacteria	Proteobacteria	Alphaproteobacteria	Rhodospirillales	Rhodospirillaceae	NA
OTU_29692	ACGAACGCTGGCGGCAGGCCTAACACATGCAAGTCGAACGTGAAGCCAGAGCTTGCTCTGGTGGAAAGTGGCAGACGGGTGAGTAACGCGTGGGAATTTACCCAGTGGTACGGAATAACTCAGGGAAACGTGAGCTAATACCGTATAAGCCCTTCGGGGGAAAGATTCATCGCCACTGGATGAGCCCGCGTCGGATTAGCTTGTTGGTGGGGTAAAAGCCTACCAAGGCTACGATCCGTAGCTGGTCTGAGAGGATGATCAGCCACACTGGGACTGAGACACGGCCCAGACTCCTACGGGAGGCAGCAGTGGGGAATATTGCACAATGGGCGCAAGCCTGATGCAGCCATGCCGCGTGAGTGAAGAAGGCCTTAGGGTTGTAAAACTCTTTCGCCGGTG…	0	0	0	0	0	0	0	0.00513149	0	0	0	0	0	Bacteria	Proteobacteria	Alphaproteobacteria	Rhizobiales	Rhodobiaceae	NA
OTU_29693	ACGAACGCTGGCGGCAGGCTTAACACATGCAAGTCGAACGGTCTCTTCGGAGGCAGTGGCAGACGGGTGAGTAACGCGTGGGAACCTACCTATTTCTACGGAACAACAGTTGGAAACGACTGCTAATACCGTATACGTCCTTAGGGAGAAAGATTTATCGGAAATAGATGGGCCCGCGTTAGATTAGCTAGTTGGTGAGGTAATGGCTCACCAAGGCGACGATCTATAGCTGGTCTGAGAGGATGATCAGCCACACTGGAACTGAGACACGGTCCAGACTCCTACGGGAGGCAGCAGTGGGGAATATTGGACAATGGGCGCAAGCCTGATCCAGCCATGCCGCGTGAGTGATGAAGGCCTTAGGGTTGTAAAGCTCTTTCAACGGTGAAGATAATGACG…	0	0	0	0	0	0	0	0	0	0.00365965	0	0	0	Bacteria	Proteobacteria	Alphaproteobacteria	Rhizobiales	Phyllobacteriaceae	NA
OTU_29694	ACGAACGCTGGCGGCAGGCCTAACACATGCAAGTCGAAGGAGAAGTTTCTCTTCGGAGAGATAGACACTGGCGCACGGGTGAGTAACGCGTGGGAATCTACCCCGGGGTGGGGGACAACCGCTGGAAACGGCGGCTAATACCGCATACGCCTCAAGAGGGAAAGCTTTAGCGCCCTGGGATGAGCCCGCGTTAGATTAGGTAGTTGGTGGGGTAACGGCCTACCAAGCCTTCGATCTATAGCTGGTCTGAGAGGATGATCAGCCACACTGGGACTGAGACACGGCCCAGACTCCTACGGGAGGCAGCAGTGGGGAATATTGGACAATGGGGGCAACCCTGATCCAGCCATGCCGCGTGCGTGAAGAAGGCCTTAGGGTTGTAAAGCGCTTTCACTGGTG…	0	0	0	0	0	0	0	0	0	0.00365965	0	0	0	Bacteria	Proteobacteria	Alphaproteobacteria	Rhodospirillales	Rhodospirillaceae	Pelagibius
OTU_29695	ACGAACGCTGGCGGCAGGCCTAACACATGCAAGTCGAACGAGCTCTTCGGAGTTAGTGGCGGACGGGTTAGTAACGCGTGGGAATATGCCCCTGGGTAAGGAACAACAGCTGGAAACGGCTGCTAATACCTTATGATGTCTACGGACCAAAGATTTATCGCCCAGGGATTAGCCCGCGTTGGATTAGGTAGTTGGAGGGGTAACGGCCCACCAAGCCTACGATCCATAGCTGGTTTGAGAGGATGATCAGCAACACTGGGACTGAGACACGGCCCAGACTCCTACGGGAGGCAGCAGTGGGGAATCTTAGACAATGGGGGAAACCCTGATCTAGCCATGCCGCGTGATCGATGACGGCCTTAGGGTTGTAAAGATCTTTCGACGGGGACGATAATGACG…	0	0	0	0	0	0	0	0	0	0	0.00566572	0	0	Bacteria	Proteobacteria	Alphaproteobacteria	Rhodobacterales	Rhodobacteraceae	NA
OTU_29700	ACGAACGCTGTCGGCAGGCCTAACACATGCAAGTCGTACGAAGCCTTCGGGCTTAGTGGCGAACGGGTGAGTATCGCGTGGGAACGTGCCCTTGGGTAAGGAACAACAGTTGGAAACGACTGCTAATACCTTATGATGTCTTCGGACCAAAGATTTATCGCCCAAGGATCGGCCCGCGTTAGATTAGGTAGTTGGTGGGGTAAAAGCCTACCAAGCCTACGATCTATAGCTGGTCTGAGAGGATGATCAGCCACACTGGGACTGAGACACGGCCCAGACTCCTACGGGAGGCAGCAGTGGGGAATCTTGGACAATGGGCGAAAGCCTGATCCAGCCATGCCGCGTGAGCGATGACGGCCTTAGGGTTGTAAAGCTCTTTCGCCTGCGAAGATAATGACT…	0	0	0	0	0	0	0	0	0	0	0	0	0.0153846	Bacteria	Proteobacteria	Alphaproteobacteria	Rhodobacterales	Rhodobacteraceae	NA
OTU_832	ACGAACGCTGGCGGCAGGCTTAACACATGCAAGTCGAGCGCTCTCTTCGGAGGGAGCGGCGGACGGGTGAGTAACGCGTGGGAACGTGCCCTTCTCTACGGAATAGCCCTTGGAAACGAGGATTAATACCGTATACGCCCTTTGGGGGAAAGATTTATCGGAGAAGGATCGGCCCGCGTTAGATTAGGTAGTTGGTGGGGTAATGGCCTACCAAGCCGACGATCTATAGCTGGTTTGAGAGGATGATCAGCCACACTGGGACTGAGACACGGCCCAGACTCCTACGGGAGGCAGCAGTGGGGAATCTTAGACAATGGGGGCAACCCTGATCTAGCCATGCCGCGTGTGTGATGAAGGCCCTAGGGTCGTAAAGCACTTTCGCCTGTGAAGATAATGACG…	0	0	0.006917	0	0	0	0	0	0	0	0	0	0	Bacteria	Proteobacteria	Alphaproteobacteria	Rhodobacterales	Rhodobacteraceae	Labrenzia
OTU_5831	ACGAACGCTGGCGGCAGGCTTAACACATGCAAGTCGAGCGCTCTCTTCGGAGGGAGCGGCGGACGGGTGAGTAACGCGTGGGAACGTGCCCTTTACTACGGAATAGCCTCTGGAAACGGAGATTAATACCGTATGTGCCCTTCGGGGGAAAGATTTATCGGTAAAGGATCGGCCCGCGTTAGATTAGGTAGTTGGTGGGGTAATGGCCTACCAAGCCGACGATCTATAGCTGGTTTGAGAGGATGATCAGCCACACTGGGACTGAGACACGGCCCAGACTCCTACGGGAGGCAGCAGTGGGGAATCTTAGACAATGGGGGAAACCCTGATCTAGCCATGCCGCGTGTGTGATGAAGGCCCTAGGGTCGTAAAGCACTTTCGCCTGTGAAGATAATGACG…	0	0.00361197	0	0	0	0	0	0	0	0	0	0	0	Bacteria	Proteobacteria	Alphaproteobacteria	Rhodobacterales	Rhodobacteraceae	Jannaschia
OTU_11923	ATGAACGCTGGCGGCGTGCCTAACACATGCAAGTCGAACGGGAAACTACCTTCGGGTAGTGGAGAGTGGCGAACGGGTGAGTAACACGTAGCTAATCTACCCTTAAGACGAGGATAACTATTGGAAACAGTAGCTAATACTCGATAAGCTCCCATCGAATAGAGAGATGAGAGAAAAGTTCAGGCGCTTAAGGATGAGGCTGCGAACCATCAGCTAGTTGGTAAGGTAAAGGCTTACCAAGGCGACGACGGTTAGGGGACCTGAGAGGGTGACCCCCCACACTGGAACTGAGACACGGTCCAGACTTCTACGGAAGGCAGCAGTGAGGAATATTGCACAATGGGCGAAAGCCTGATGCAGCGACGCCGCGTGGGTGAAGACGGATTTCGGTCTGTAAAG…	0	0	0.006917	0	0	0	0	0	0	0	0	0	0	Bacteria	Proteobacteria	Alphaproteobacteria	Rhodobacterales	Rhodobacteraceae	Halovulum
OTU_31071	ACGAACGCTGGCGGCATGCCTAACACATGCAAGTCGAACGAAGGCCCCAGCTTGCTGGGTAACCTTAGTGGCGGACGGGTGAGTAACGCGTGGGCACCTGCCCTAGAGTGAAGGATAACCACTGGAAACGGTGGCTAATACTGCATAATCCCTTAGGGGGAAAGGCTTCGGCCGCTCTTGGATGGGCCCGCGTTAGATTAGCTAGTTGGTGGGGTAAAGGCCTACCAAGGCGACGATCTATAGCTGGTCTGAGAGGATGATCAGCCACACTGGGACTGAGACACGGCCCAGACTCCTACGGGAGGCAGCAGTGGGGAATATTGGACAATGGGGGAAACCCTGATCCAGCAATGCCGCGTGAGTGAAGAAGGCCCTAGGGTTGTAAAACTCTTTCACTGA…	0	0.00361197	0	0	0	0	0	0	0	0	0	0	0	Bacteria	Proteobacteria	Alphaproteobacteria	Rhodobacterales	Rhodobacteraceae	NA
OTU_31072	ACGAACGCTGGCGGCACGCCTAACACATGCAAGTCGAGCGCTACCTTCGGGTGGAGCGGCGGACGGGTTAGTAACGCGTGGGAACATACCCTTTTCTGCGGAATAGCCTTTGGAAACGAAGAGTAATACCGCATACGCCCTTCGGGGGAAAGATTTATCGGTGAAGGATTGGCCCGCGTTAGATTAGATAGTTGGTGGGGTAATGGCCTACCAAGTCTACGATCTATAGCTGGTTTGAGAGGATGATCAGCAACACTGGGACTGAGACACGGCCCAGACTCCTACGGGAGGCAGCAGTGGGGAATCTTAGACAATGGGCGAAAGCCTGATCTAGCCATGCCGCGTGAGTGACGAAGGCCTTAGGGTCGTAAAGCTCTTTCGCCAGGGATGATAATGACA…	0	0	0.006917	0	0	0	0	0	0	0	0	0	0	Bacteria	Chloroflexi	Anaerolineae	Anaerolineales	Anaerolineaceae	NA
OTU_31073	ATGAACGCTAGCGGCAGGCTTAATACATGCAAGTCGAACGGCAGCATGCACTTCGGTGTGATGGCGAGTGGCGCACGGGTGAGTAACGCGTACAAAATCTACCTTCTACAGGGGGAAAGTCGCTGGAAACGGCGAATAATCCCGCATAAGACTACAGTATCGCATGGTACAGGAGTTAAAGGAGAGATCTGGTGGAAGATGATTGTGCGTTCCATTAGCTAGTTGGTGTGGTAACGGCATACCAAGGCGACGATGGGTAGGGGGCGTGAGAGCGTGATCCCCCACACGGGTACTGAGACACGGACCCGACTCCTACGGGAGGCAGCAGTGGGGAATCTTCGGCAATGGGGGCAACCCTGACCGAGCCATGCCGCGTGAGTGATGAAGGCCTTAGGGTCG…	0	0	0.006917	0	0	0	0	0	0	0	0	0	0	Bacteria	Proteobacteria	Alphaproteobacteria	Rhodospirillales	Rhodospirillaceae	NA
OTU_31074	ACGAACGCTGGCGGCAGGCTTAACACATGCAAGTCGAACGATCCTTCGGGATAGTGGCAGACGGGTGAGTAACGCGTGGGAACCTACCTTATTCTACGGAATAACAGTTAGAAATGACTGCTAATACCGTATACGCCCTTTGGGGGAAAGATTTATCGGAGTAGGATGGGCCCGCGTTGGATTAGCTAGTTGGTGGGGTAATGGCCTACCAAGGCGACGATCTATAGCTGGTCTGAGAGGATGATCAGCCACACTGGAACTGAGACACGGTCCAGACTCCTACGGGAGGCAGCAGTGGGGAATATTGGGCAATGGGCGCAAGCCTGACCCAGCCATGCCGCGTGTGTGAAGAAGGCTCTAGGGTTGTAAAGCACTTTAAGTAGGGAGGAAAGGGTGTCG…	0	0	0.006917	0	0	0	0	0	0	0	0	0	0	Bacteria	Proteobacteria	Alphaproteobacteria	Rhodobacterales	Rhodobacteraceae	Loktanella
OTU_31075	ACGAACGCTGGCGGCAGGCTTAACACATGCAAGTCGAACGACCTCTTCGGAGGGAGTGGCAGACGGGTGAGTAACGCGTGGAAACGTGCCCTTTACTACGGAATAGCCCTTGGAAACGAGGTGTAATACCGTATACGCCCTTAGGGGGAAAGATTTATCGGTAAAGGATCGGTCCGCGTTAGATTAGTTTGTTGGTGGGGTAATGGCCTACCAAGACTACGATCTATAGCTGATTTGAGAGGATGATCAGCCACACTGGAACTGAGACACGGTCCAGACTCCTACGGGAGGCAGCAGTGGGGAATCTTGGACAATGGGGGAAACCCTGATCCAGCCATGCCGCGTGAATGATGAAGGCCTTAGGGTTGTAAAATTCTTTCACCGGGGAAGATAATGACG…	0	0	0	0.00293994	0	0	0	0	0	0	0	0	0	Bacteria	Bacteroidetes	Sphingobacteriia	Sphingobacteriales	Saprospiraceae	Aureispira
OTU_31076	ACGAACGCTGGCGGCAGGCCTAATACATGCAAGTCGAGCGCTCTCTTCGGAGGGAGCGGCGGACGGGTGAGTAACGCGTGGGAATATGCCCTTCTCTACGGAATAGCCTCGGGAAACTGAGAGTAATACCGTATACGCCCTTCGGGGGAAAGATTTATCGGAGAAGGATTAGCCCGCGTTAGATTAGGTAGTTGGTGAGGTAATGGCTCACCAAGCCTACGATCTATAGCTGGTTTGAGAGGATGATCAGCCACACTGGGACTGAGACACGGCCCAGACTCCTACGGGAGGCAGCAGTAGGGAATCTTAGACAATGGGGGAAACCCTGATCTAGCCATGCCGCGTGTGTGATGAAGGCCTTAGGGTTGTAAAGCACTTTCGCCAGGGATGATAATGACA…	0	0	0	0.00293994	0	0	0	0	0	0	0	0	0	Bacteria	Proteobacteria	Gammaproteobacteria	NA	NA	NA
OTU_31077	ATGAACGCTGGCGGCAGGCTTAACACATGCAAGTCGAACGTTAACGCACCTTCGGGTGTTATTAAAGTGGCAAACGGGTGAGTAACACGTGGGAACGTACCTTTCAGTCTGGAATAGCCCTGGGAAACTAGGATTAACGCCGGATATTCTCTACGGAGGAAAGATTTATCGCTGAAAGATCGGCCCGCGTTAGATTAGCTAGTTGGTAAGGTAACGGCTTACCAAGGCTACGATCTATAGCTGGTCTGAGAGGATGATCAGCCACACTGGGACTGAGATACGGCCCAGACTCCTACGGGAGGCAGCAGTGAGGAATATTGGACAATGGAGGAAACTCTGATCCAGCCATGCCGCGTGAGTGATGAAGGCCTTCGGGTTGTAAAACTCTTTCAGTGGGGA…	0	0	0	0.00293994	0	0	0	0	0	0	0	0	0	Bacteria	Proteobacteria	Alphaproteobacteria	Caulobacterales	Hyphomonadaceae	Hirschia
OTU_31078	ACGAACGCTGGCGGCGTGCCTAACACATGCAAGTCGAGCGCGAACGGCTCCTTCGGGGGCCTAGTAGAGCGGCGCACGGGTGAGTAACACGTGAGTAACGTGCCTTCAGGTAGGGAATAACCATTCGAAAGGATGGCTAATGCCGTATAAGACCACATCGTCGTCTGGCGAAGCGGTCAAAGCTCCGGCGCCTGAAGATCGGCTCGCGGTTCATTAGGTAGTTGGTGAGGTAATGGCTCACCAAGCCTGAGATGAATAGCTGGTCTGAGAGGATGATCAGCCACACTGGGCCTGAGACACGGCCCAGACACCTACGGGTGGCAGCAGTGGGGAATCTTGCACAATGGACGAAAGTCTGATGCAGCAACGCCGCGTGTGTGACGAAGGCCTGCGGGTCGT…	0	0	0	0.00293994	0	0	0	0	0	0	0	0	0	Bacteria	Proteobacteria	Alphaproteobacteria	Rhodobacterales	Rhodobacteraceae	Ponticoccus
OTU_31079	ATGAACGCTGGCGGTATGCCTAACACATGCAAGTTGAACGAAAGCTTATGCTTTAGTAGCGGACGGGTGAGTAACGCATGAGAATCTGCCTCTAGGAAAGGAATAACAATTGGAAACGACTGCTAATACCTTATATGCTATTTATAGTGAAAAGAGTAATCTGCCTAGAGATGAGCTCATGTCTGATTAGCTAGATGGTAAGGTAACGGCTTACCATGGCGACGATAGGTAGGGGCCCTGAGAGGGGGATCCCCCACACTGGTACTGAGACACGGACCAGACTCCTACGGGAGGCAGCAGTGAGGAATATTGGACAATGGAGGCAACTCTGATCCAGCCATGCCGCGTGCAGGATGACTGCCCTATGGGTTGTAAACTGCTTTTATACAGGAAGAAACC…	0	0	0	0	0.00476515	0	0	0	0	0	0	0	0	Bacteria	Proteobacteria	Alphaproteobacteria	Rickettsiales	SM2D12	NA
OTU_31081	GTGAACGCTAGTAGTATGCTTTACACATGCAAGTTGAACGAATTAATTTTCGTAGCGAACGGGTGAGGAGAATATAGAATTTTACCTTTTAATTCAAGATAAAACATTTTTATTGTAAAAAGTAAAAATTTTGTTAATATTGAATAATTACAAAGACTATCATAGAGTATATTAAAAATAGTTGTTAAAAGATAAATCTATATAAGATTAGGTAGTTGGTAATTTTATAGATTACCAAGCCTGTGATCTTTAGTTGGTCTGAGAGGACGATCAACCACACTGGAACTGAGATAAGGTCCAGGCTGAATTTTCGGCCAGCAGTGAGGGATATTGGACAATGAACGAAAGTTTGATCCAGCAATACTATGTGAATGATGACGGCTATTTTGGTTGTAAAGT…	0	0	0	0	0	0.00473293	0	0	0	0	0	0	0	Bacteria	Proteobacteria	Deltaproteobacteria	Bradymonadales	NA	NA
OTU_31082	ACGAACGCTGGCGGCAGGCCTAACACATGCAAGTCGAACGAAGCCTTCGGGCTTAGTGGCGGACGGGTGAGTAACGCGTGGGAATATGCCCTTTGGTACGGAACAACAGTTGGAAACGGCTGCTAATACCGTATGTGCCCTACGGGGGAAAGATTTATCGCCAAAGGATTAGCCCGCGTTGGATTAGGTAGTTGGTGAGGTAACGGCTCACCAAGCCGACGATCCATAGCTGGTTCGAGAGGATGACCAGCCACACTGGGACTGAGACACGGCCCAGACTCCTACGGGAGGCAGCAGTGGGGAATCATAGACAATGGGGGCAACCCTGATCTTGCCATGCCGCGTGAACGATGAAGGCCTTAGGGTTGTAAAGTTCTTTCACTGGTGAAGATAATGACG…	0	0	0	0	0	0	0.00560448	0	0	0	0	0	0	Bacteria	Bacteroidetes	Flavobacteriia	Flavobacteriales	Flavobacteriaceae	NA
OTU_31083	ACGAACGCTGGCGGCAGGCCTAACACATGCAAGTCGAGCGAGCAGTCACCTTCGGGTGGCGGGCGAGCGGCGAACGGGTGAGTAACGCGTGGGAACCTGCCCTTCGGTACGGGACAACCTCGGGAAACTGGGGCTAATACCGTATGATCTCTACGGAGCAAAGATTTATCGCCGAAGGATGGTCCCGCGTCCGATTAGGTTGTTGGTGTGGTAACGGCGCACCAAGCCTACGATCGGTAGCTGGTCTGAGAGGATGATCAGCCACACTGGGACTGAGACACGGCCCAGACTCCTACGGGAGGCAGCAGTGGGGAATATTGGACAATGGGGGCAACCCTGATCCAGCCATGCCGCGTGCGTGAAGAAGGCCTTAGGGTTGTAAAGCGCTTTCAGCGGGGA…	0	0	0	0	0	0	0	0.00449006	0	0	0	0	0	Bacteria	Proteobacteria	Alphaproteobacteria	Rickettsiales	Mitochondria	NA
OTU_31084	ACGAACGCTGGCGGCAGGCCTAACACATGCAAGTCGAACGCCCTCTTCGGAGGGAGTGGCGCACGGGTGAGTAACGCGTGGGAACCTAGCCCTTGGTACGGAACAACCGCGGGAAACTGCGGCTAATACCGTATATCCCCTGCGGGGGAAAGATTTATCGCCGAGGGATGGGCCCGCGTCTGATTAGCTGGTTGGTGAGGTAACGGCTCACCAAGGCATCGATCAGTAGCTGGTCTGAGAGGATGATCAGCCACACTGGGACTGAGACACGGCCCAGACTCCTACGGGAGGCAGCAGTGGGGAATATTGGACAATGGGGGCAACCCTGATCCAGCCATGCCGCGTGAGTGAAGAAGGCCTTAGGGTTGTAAAGCTCTTTCAACGGTGAAGATGATGACA…	0	0	0	0	0	0	0	0.00449006	0	0	0	0	0	Bacteria	Proteobacteria	Alphaproteobacteria	Rhodobacterales	Rhodobacteraceae	NA
OTU_31085	ATGAACGCTGGCGGTATGCCTAACACATGCAAGTTGAACGAAAGCTTATGCTTTAGTGGCGGACGGGTGAGTAATGCCTGGGAATTTGCCTTTGCGAGGGGGATAACTATTGGAAACGATAGCTAATACCGCATAATAGCTACGGCTCAAAGTAGGGACTGGTTCCTTGCGCGCAAAGAGAAGCCCAGGTGAGATTAGCTAGTTGGTGAGGTGAAGGCTCACCAAGGCGACGATCTCTAGCTGTTCTGAGAGGAAGATCAGCCACACTGGGACTGAGACACGGCCCAGACTCCTACGGGAGGCAGCAGTGGGGAATATTGCACAATGGGGGGAACCCTGATGCAGCCATGCCGCGTGTGTGAAGAAGGCCTTCGGGTTGTAAAGCACTTTCAGACGTGA…	0	0	0	0	0	0	0	0	0	0.0032022	0	0	0	Bacteria	Proteobacteria	Alphaproteobacteria	Rhodospirillales	Rhodospirillaceae	NA
OTU_31086	ACGAACGCTGGCGGCACGCCTAACACATGCAAGTCGAGCGCACCTTCGGGTGAGCGGCGGACGGGTTAGTAACGCGTGGGAACATACCCTTCTCTACGGAATAGCCTCGGGAAACTGAGAGTAATACCGTATACGCCCTTCGGGGGAAAGATTTATCGGAGAAGGATTGGCCCGCGTTAGATTAGTTAGTTGGTGGGGTAACGGCCTACCAAGACGACGATCTATAGCTGGTTTGAGAGGATGATCAGCAACACTGGGACTGAGACACGGCCCAGACTCCTACGGGAGGCAGCAGTGGGGAATCTTAGACAATGGGGGAAACCCTGATCTAGCGATGCCGCGTGAGTGATGAAGGCCCTAGGGTCGTAAAGCTCTTTCGCCAGAGATGATAATGACAGT…	0	0	0	0	0	0	0	0	0	0	0.00495751	0	0	Bacteria	Proteobacteria	Alphaproteobacteria	Rhodospirillales	Rhodospirillaceae	NA
OTU_31087	ACGAACGCTGGCGGCAGGCTTAACACATGCAAGTCGAACGAACTCTTCGGAGTTAGTGGCAGACGGGTGAGTAACGCGTGGGAACCTACCTTTAGGTACGGAACAACAGTTGGAAACGACTGCTAATACCGTATGTGCCCTATGGGGGAAAGATTTATCGCCTAAGGATGGGCCCGCGTTGGATTAGCTAGTTGGTGGGGTAAAGGCTTACCAAGGCGACGATCCATAGCTGGTCTGAGAGGATGATCAGCCACACTGGGACTGAGACACGGCCCAGACTCCTACGGGAGGCAGCAGTGGGGAATATTGGACAATGGGGGCAACCCTGATCCAGCCATGCCGCGTGAGTGATGAAGGCCCTAGGGTTGTAAAGCTCTTTCAGCGAGGAGGATAATGACG…	0	0	0	0	0	0	0	0	0	0	0.00495751	0	0	Bacteria	Proteobacteria	Gammaproteobacteria	Alteromonadales	Alteromonadaceae	NA
OTU_32585	ATGAACGCTAGCGGCAGGCTTAACACATGCAAGTCGAGGGGTAACAGAGGTGCTTGCACTTGCTGACGACCGGCGCACGGGTGCGTAACGCGTATACAATCTACCTTATACTGAGGGATAGCCCAGAGAAATTTGGATTAATACCTCATGGTATCATAAAGCTGCATAGTTTAATGATTAAAGGTTACGGTATAAGATGAGTATGCGTCCTATTAGCTAGATGGTAAGGTAACGGCTTACCATGGCGACGATAGGTAGGGGCCCTGAGAGGGGGATCCCCCACACTGGTACTGAGACACGGACCAGACTCCTACGGGAGGCAGCAGTGGGGAATTTTCCGCAATGGGCGCAAGCCTGACGGAGCAATACCGCGTGAGGGAAGAATGCCTGAGGGTTGTA…	0.00654308	0	0	0	0	0	0	0	0	0	0	0	0	Bacteria	Bacteroidetes	Flavobacteriia	Flavobacteriales	Flavobacteriaceae	NA
OTU_32588	ATGAACGCTGGCGGCACGCTTAACACATGCAAGTCGAACGAGGTCCATGGAGCTTGCTCCGGAAGACCTAGTGGCGAACGGGTGCGTAACACGTGAGAAACCTGTCCTGGACTTTGGGATAACAGTTGGAAACGACTGCTAATACCGAATGCCGTCAACACCTCGCATGAGGAGATGACGAAAGGTCCGCCGGTCCAGGAGGGTCTCACGGCCTATCAGCTTGTTGGAGAGGTAACGGCTCACCAAGGCTTCGACGGGTAGCTGGTCTGAGAGGATGATCAGCCACACTGGAACTGAGACACGGTCCAGACTCCTACGGGAGGCAGCAGTGGGGAATCTTGCACAATGGGCGCAAGCCTGATGCAGCGATGCCGCGTGCGGGAAGAAGGCCCTAGGGTT…	0	0	0	0	0.00408441	0	0	0	0	0	0	0	0	Bacteria	Actinobacteria	Acidimicrobiia	Acidimicrobiales	Acidimicrobiaceae	Ilumatobacter
OTU_32589	ATGAATGCTGAAGGTATGCTTAACTCATGCAAGTCAAACGAAGTTTAAAAAATTAAGCTTAGTGGCGTATACGTGAGTAATATTTTGAAACTAATCAAAAGGTACGGAATAACCTTATTTCATAGGAAATACCGTATATGAAAAATTTAAAAATGCCTTTTGTTAGGTTAGAATAGTATCAAGGTAGTTGGTGAGGTAAGGGCTCACCAAGCCGATGACGCTTAGCTGGTCTGTGAGGATGTGGAGCCACGCCGGGACTGGAATAAAGCCCGGATTTTTTCGAAAGTCAGCAGAGTGGAATTTTGGGCAATGAGCTAAAGCTTGACCCAGCAATACCTTGTGGGTGATGAAAGGCTTTTATAGTCGTAAAACCATGAGTTAGAGAGAATAATGATGTTA…	0	0	0	0	0.00408441	0	0	0	0	0	0	0	0	Bacteria	NA	NA	NA	NA	NA
OTU_32590	ACGAACGCTGGCGGTGGGCTTAACACATGCAAGTCGAACGCATTCTTCGGAATGAGTGGCGCACGGGTGAGTAACGCGTGGGAACCTGCCTCGGGGTTGGGAATAACCGTGGGAAACTGCGGCTAATACCCAATACGCCCTTAATTGGGGAAAGATTTATTGCCCTGGGATGGGCCCGCGTCCGATTAGCTTGTTGGTAGGGTAATGGCCTACCAAGGCTACGATCGGTAGCTGGTCTGAGAGGATGATCAGCCACACTGGGACTGAGATACGGCCCAGACTCCTACGGGAGGCAGCAGTGGGGAATATTGGACAATGGGCGCAAGCCCGATCCAGCCATACCGCGTGGGTGAAGAAGGCCTTAGGGTTGTAAAGCCCTTTCAGTCGCGACGATGATGA…	0	0	0	0	0	0	0	0.00384862	0	0	0	0	0	Bacteria	Proteobacteria	Alphaproteobacteria	Rhodospirillales	Rhodospirillaceae	NA
OTU_32591	ACGAACGTTGGCGGCGTGCTTAACACATGCAAGTCGAGCGAGAAAGTAGACTTCGGTCTGCGAGTAAAGCGGCGCACGGGTGAGTAACACGTGAGTAACGTACCGCAAAGCTGGGGATAACCCTTCGAAAGGAGGGCTAATACCCAATAAGACCACAGTGGCTGCGGCCACAGGGGTCAAAGCTTTATGCACTTTGCGATCGGCTCGCGGTCCATTAGATAGTTGGTGAGGTAATGGCTCTACCAAGTCTGAGATGGATAGCTGGTCTGAGAGGATGATCAGCCACACTGGGACTGAGACACGGCCCAGACTCCTGCGGGAGGCAGCAGTGGGGAATCTTGCGCAATGGGCGAAAGCCTGACGCAGCAACGCCGCGTGTGTGACGAAGGCCTTCGGGTC…	0	0	0	0	0	0	0	0.00384862	0	0	0	0	0	Bacteria	Proteobacteria	Deltaproteobacteria	Bradymonadales	NA	NA
OTU_32592	ATGAACGCTGGCGGTATGCCTAACACATGCAAGTTGAACGAAAGCTTATGCTTTAGTAGCGGACGGGTGAGTAACGCATGAGAATCTGCCTCTAGGAAAGGAATAACAATTGGAAACGACTGCTAATACCTTATATGCTATTTATAGTGAAAAGAGTAATCTGCCTAGAGATGAGCTCATGTCTGATTAGCTAGTTGGTAAGGTAAAGGCTTACCAAGGCAACGATCAGTAGCTGGTTTGAGAGGACGATCAGCCACACCGGGACTGAGACACGGCCCGGACTCCTACGGGAGGCAGCAGTGGGGAATATTGCGCAATGGGGGCAACCCTGACGCAGCCATGCCGCGTGTGTGAAGAAGGCCTTCGGGTTGTAAAGCACTTTCACTGGGGAAGAAAAGT…	0	0	0	0	0	0	0	0	0.00670391	0	0	0	0	Bacteria	Proteobacteria	Gammaproteobacteria	NA	NA	NA
OTU_32593	ACGAACGCTGGCGGCAGGCTTAACACATGCAAGTCGAACGGTCTCTTCGGAGGCAGTGGCAGACGGGTGAGTAACGCGTGGGGATATACCTATTGGTAAGGAACAACAGTTGGAAACGACTGCTAATACCTTATACGTCCTTCGGGAGAAAGATTTATCGCCGATAGATTAACCCGCGTTAGATTAGCTAGTTGGTGAGGTAATGGCTCACCAAGGCGACGATCTATAGCTGGTCTGAGAGGATGATCAGCCACACTGGAACTGAGACACGGTCCAGACTCCTACGGGAGGCAGCAGTGGGGAATATTGGGCAATGGGCGCAAGCCTGACCCAGCCATGCCGCGTGTGTGAAGAAGGCTCTAGGGTTGTAAAGCACTTTAAGTAGGGAGGAAAGGGTGT…	0	0	0	0	0	0	0	0	0.00111732	0.000457457	0.000708215	0	0.00576923	Bacteria	Proteobacteria	Gammaproteobacteria	NA	NA	NA
OTU_32594	ACGAACGCTGGCGGCAGGCCTAACACATGCAAGTCGAACGGACTCTTCGGAGTTAGTGGCGCACGGGTGAGGAACACGTGGGAACATACCCTTTGGTAGGGAATAATGTCTGGAAACGGACACTAATACCCTATAATGACTACGGTCCAAAGATTTATCGCCAAAGGATTGGCCCGCGCATGATTAGATAGTTGGTGAGGTAACGGCTCACCAAGTCTGCGATCATTAGCTGGTCTGAGAGGATGATCAGCCACACTGGGACTGAGACACGGCCCAGACTCCTACGGGAGGCAGCAGTGAGGAATATTGGACAATGGAGGAAACTCTGATCCAGCCATGCCGCGTGAGTGAAGAAGGCCTTAGGGTTGTAAAGCTCTTTCAGATGCGAAGATAATGACG…	0	0	0	0	0	0	0	0	0	0.00274474	0	0	0	Bacteria	Proteobacteria	Alphaproteobacteria	Alphaproteobacteria_Incertae_Sedis	Unknown_Family	NA
OTU_32595	ACGAACGCTGGCGGCAGGCCTAACACATGCAAGTCGAACGCACCTTCGGGTGAGTGGCAGACGGGTGAGGAACACGTGGGAACGTGCCTATCGGTGGGGGATAACTTCGGGAAACCGGAGCTAATACCGCATACGCCCTTCGGGGGAAAGATTTATCGCCGATAGATCGGCCCGCGTCTGATTAGCTAGTTGGTGAGGTAACGGCTCACCAAGGCGACGATCAGTAGCTGGTTTGAGAGGATGATCAGCCACACTGGGACTGAGACACGGCCCAGACTCCTACGGGAGGCAGCAGTGGGGAATATTGGACAATGGGCGCAAGCCTGATCCAGCCATGCCGCGTGAGTGACGAAGGCCTTAGGGTTGTAAAACTCTTTCGCCGGCGAAGATAATGACGGT…	0	0	0	0	0	0	0	0	0	0	0.00424929	0	0	Bacteria	Proteobacteria	Alphaproteobacteria	Rhizobiales	NA	NA
OTU_32596	ATGAACGCTAGTAGTATGCTTAACACATGCAAGTCGAACGGAATTTTTTCGTGGCGAACGGGTGAGGAACACACAGAATGCTACCTTTTAGTTTAGAACAATTATATCGACAAGATATTAAAATTCTAAATAATTTCTAAAGGTTTATATTTTATATATTCCGCTAAAAGATGGGTCTGTGAAAGATTAGGTAGTTGGTAATTTTAACAGCTTACCAAGCCTTTGATCTTTAGTTGGTCTTAGAGGACGATCAACCACACTGGAACTGAAATAAGGTCCAGGCTGAATTTTCGGCCAGCAGTGAGGAATATTGGACAATGAACGAAAGTTTGATCCAGCAATACTATCTGAATGAAGACGGCTTTTTTTAGTTGTAAAATTCTTTCGTTAAGAATGATA…	0	0	0	0	0	0	0	0	0	0	0	0.00368098	0	Bacteria	Proteobacteria	Alphaproteobacteria	Rickettsiales	Mitochondria	NA
OTU_32597	ATGAACGCTAGCGGGAGGCTTAATACATGCAAGTCGAGGGGTAACAGTTCGGCTGACGACCGGCGCACGGGTGAGTAACGCGTACAAATCTACCTTTAGGAGAGGGACAGCCCTGGGAAACTGGGATTAATACCTCATGGTCTCGCTTTTCGGAGTGAGTAAATGCTTCGGTGCCTAAAGATGAGTGTGCGTCCTATTAGCTAGTTGGTAAGGTAATGGCTTACCAAGGCTACGATAGGTAGGGGGCGTGAGAGCGTGATCCCCCACACGGGTACTGAGACACGGACCCGACTCCTACGGGAGGCAGCAGTAAGGAATATTGGACAATGGGCGCAAGCCTGATCCAGCCATCCCGCGTGCAGGATGACGGCTCTATGGGTTGTAAACTGCTTTTGTGAG…	0	0	0	0	0	0	0	0	0	0	0	0	0.0115385	Bacteria	Bacteroidetes	Sphingobacteriia	Sphingobacteriales	Saprospiraceae	NA
OTU_2415	TTGAACGCTGGCGGCATGCTTAACACATGCAAGTCGAACGAGAAAGTTCCTTCGGGAGCGAGTAAAGTGGCGGACGGGTGAGTAACGCGTGGGAATCTGCCTAGTAGTTGGGGACAACTCGGGGAAACTCGAGCTAATACCGAATACGCCCTATGGGGGAAAGGCTTCGGCCGCTATTAGATGAGCCCGCGTAAGATTAGCTTGTTGGTGGGGTAATGGCCTACCAAGGCGACGATCTTTAGCTGGTCTGAGAGGACGATCAGCCACACTGGGACTGAGACACGGCCCAGACTCCTACGGGAGGCAGCAGTGGGGAATATTGGACAATGGGGGAAACCCTGATCCAGCAATGCCGCGTGTGTGAAGAAGGCCTGCGGGTTGTAAAGCACTTTCAGTAGG…	0	0	0	0	0	0	0	0	0	0.00228728	0	0	0	Bacteria	Proteobacteria	Proteobacteria_Incertae_Sedis	Unknown_Order	Unknown_Family	Candidatus_Tenderia
OTU_34143	ACGAACGCTGGCGGCAGGCTTAACACATGCAAGTCGAACGAGAAGCATCTTTCGGGATGTGGACAGTGGCAGACGGGTGCGTAACGCGTGGGAATATACCTTTTAGTTCGGAACAACAGATGGAAACGTCTGCTAATACCGTATACGCCCTTTGGGGGAAAGATTTATCGCTAAAAGATTGGCCCGCGTTTGATTAGCTAGTTGGTAGTGTCATAGACTACCAAGGCGACGATCAATAGCTGGTCTGAGAGGATGATCAGCCACACTGGGACTGAGACACGGCCCAGACTCCTACGGGAGGCAGCAGTGGGGAATATTGGACAATGGGCGAAAGCCTGATCCAGCCATGCCGCGTGAGTGAAGAAGGCCTTAGGGTTGTAAAGCTCTTTCACCTGTGAA…	0	0	0.00494071	0	0	0	0	0	0	0	0	0	0	Bacteria	Proteobacteria	Alphaproteobacteria	NA	NA	NA
OTU_34144	ATGAACGTTGGCGGCATGGATTAGGCATGCAAGTCGAGCGAGAAGTCTTTTTTGCTTGCATTAAAGACGGACAGCGGCGTAAGGGAGAGTAACGCGTAGAAATGTACCCCAAGGTCTGGGATAGCGGCGGGAAACTGCCAGTAATACCGGATAATGTCTCCGGACCAAAGTTTTTCGCCTTGGGAGCAGTCTGCGTACTATTAGCTTGTTGGTGGGGTAATAGCCTACCAAGGCTTAGATGGTTAGCGGGCGTGAGAGCGTGGCCCGTCTCACTGGGACTGAGACACTGCCCAGACACCTACGGGTGGCTGCAGTCGAGAATCTTCCGCAATGGGCGAAAGCCTGACGGAGCAATGCCGCGTGGTGGATGAAGGCCTTCGGGTTGTAAACACCTGTCAG…	0	0	0.00494071	0	0	0	0	0	0	0	0	0	0	Bacteria	Planctomycetes	Planctomycetacia	Planctomycetales	Planctomycetaceae	Blastopirellula
OTU_34145	ACGAACGCTGGCGGCAGGCCTAACACATGCAAGTCGAACGAAGTCTTCGGACTTAGTGGCGCACGGGTGAGTAACGCGTGGGAATTTACCTATTGGTTCGGAATAACAGTTGGAAACGACTGCTAATACCGTATACGCCCTTCGGGGGAAAGATTTATCGCCGATAGATGAGCCCGCGTTAGATTAGGTAGTTGGTGGGGTAATGGCCTACCAAGCCTACGATCTATAGCTGGTTTGAGAGGATGATCAGCCACACTGGGACTGAGACACGGCCCAGACTCCTACGGGAGGCAGCAGTGAGGAATATTGGACAATGGGCGCAAGCCTGATCCAGCCATGCCGCGTGAGTGATGAAGGCCCTAGGGTTGTAAAGCTCTTTCAACGGTGAAGATAATGACG…	0	0	0.00494071	0	0	0	0	0	0	0	0	0	0	Bacteria	Proteobacteria	Alphaproteobacteria	NA	NA	NA
OTU_34146	ACGAACGCTGGCGGCAGGCTTAACACATGCAAGTCGAACGCCCTCTTCGGAGGGAGTGGCAGACGGGTGAGTAACGCGTGGGAATGTACCTATCGGTTCGGAATAGCCCCGGGAAACTGGGTGTAATACCGGATACGCTCTTCGGAGGAAAGATTTATCGCCGATAGATCAGCCCGCGTTAGATTAGCTAGTTGGTGAGGTAAAGGCTTACCAAGGCTACGATCTATAGCTGGTCTGAGAGGATGATCAGCCACACTGGAACTGAGACACGGTCCAGACTCCTACGGGAGGCAGCAGTGGGGAATATTGGACAATGGGCGAAAGCCTGATCCAGCCATGCCGCGTGGATGAAGAAGGCCCTAGGGTTGTAAAATCCTTTCGATGGTGAAGATAATGACG…	0	0	0.00494071	0	0	0	0	0	0	0	0	0	0	Bacteria	Proteobacteria	Alphaproteobacteria	Parvularculales	Parvularculaceae	NA
OTU_34147	TTGAACGCTGGCGGCATGGTTAAAGCATGCAAGTCGTACGAAAACCCTTCGGGGTGAAAGTGGCGAAAGGGCGAGTAACGCGATCGAACGTACCCTGAGGTGGAGGATAGCGTCGGGAAACCGGCAGTAATACTCCATGTGCTCTACGGAGGAAAGCTTAGGCGCCTCAGGAGCGGCGATCGTCCTATCAGGTAGTTGGTGAGGTAAAGGCTCACCAAGCCGAAGACGGGTAGCGGGTGTGAGAGCATGACCCGCCGCATCGGAACTGAGACACTGTCCGGACTCCTACGGGAGGCTGCAGCGACGAATCTTCCGCAATGGGCGCAAGCCTGACGGAGCAATGCCGCGTGTGGGATGAAGCATCTTCGATGTGTAAACCACTGTCAGATTCTAGGACCA…	0	0	0.00494071	0	0	0	0	0	0	0	0	0	0	Bacteria	Planctomycetes	Phycisphaerae	Phycisphaerales	Phycisphaeraceae	SM1A02
OTU_34148	ACGAACGCTGGCGGCAGGCCTAACACATGCAAGTCGAACGGATCCTTCGGGATTAGTGGCGCACGGGTGAGTAACGCGTGGAAATCTACCTCGGGATGGGGAATAACCATTGGAAACGATGGCTAATACCGCATACGCCGGAAACGGGAAAGCTTTATGCGTCCTGAGATGAGTCCGCGTTAGATTAGATAGTTGGTGGGGTAATGGCCTACCAAGTCGACGATCTATAGCTGGTCTGAGAGGATGATCAGCCACACTGGGACTGAGACACGGCCCAGACTCCTACGGGAGGCAGCAGTGGGGAATATTGGACAATGGGCGCAAGCCTGATCCAGCAATACCTCGTGTGTGAAGAAGGCCTTAGGGTTGTAAAGCACTTTCAATTGGGACGAAGGTTGG…	0	0	0.000988142	0	0	0	0	0	0	0.00182983	0	0	0	Bacteria	Proteobacteria	Alphaproteobacteria	NA	NA	NA
OTU_34150	ATGAACGCTAGCGGGAGGCTTAATACATGCAAGTCGAGGGACCATTTCGGTGGGACCGGCGCACGGGTGAGTAACGCGTACACTACCTACCTTACACAGGAGAATAGCCTTTGGAAACGAAGATTAATGCTCCATGGTACCGTTTACGGTTAAAGCTCCGGCGGTGTAAGATGGGTGTGCGTGCCATTAGCTAGTTGGTAAGGTAACGGCTTACCAAGGCTACGATGGCTAAGGGGCGTGAGAGCGTGAACCCTCACACGGGTACTGAGACACGGACCCGACTCCTACGGGAGGCAGCAGTAAGGAATATTGGTCAATGGACGCAAGTCTGAACCAGCCATCCCGCGTGCAGGATGACGGCCCTACGGGTTGTAAACTGCTTTTATAAGAGAAGAAACC…	0	0	0	0.00209996	0	0	0	0	0	0	0	0	0	Bacteria	Bacteroidetes	Sphingobacteriia	Sphingobacteriales	Saprospiraceae	NA
OTU_34151	ACGAACGCTGGCGGCACGCCTAACACATGCAAGTCGAGCGCACCTTCGGGTGAGCGGCGGACGGGTTAGTAACGCGTGGGAACATACCCTTCTCTAAGGAATAGCCACTGGAAACGGTGAGTAATACCTTATACGCCCTTCGGGGGAAAGATTTATCGGAGATGGATTGGCCCGCGTTAGATTAGATAGTTGGTGGGGTAACGGCCTACCAAGTCTACGATCTATAGCTGGTTTTAGAGGATGATCAGCAACACTGGGACTGAGACACGGCCCAGACTCCTACGGGAGGCAGCAGTGGGGAATCTTGGACAATGGGGGCAACCCTGATCCAGCCATGCCGCGTGAGTGATGAAGGCCCTAGGGTCGTAAAGCTCTTTCGCCAGAGATGATAATGACAGT…	0	0	0	0.00209996	0	0	0	0	0	0	0	0	0	Bacteria	Proteobacteria	Alphaproteobacteria	Rhodobacterales	Rhodobacteraceae	Phaeobacter
OTU_34152	ACGAACGCTGGCGGCACGCCTAACACATGCAAGTCGAGCGCTCACTTCGGTGGGAGCGGCGGACGGGTTAGTAACGCGTGGGAACGTACCCTTTACTACGGAATAGCCTCTGGAAACGGAGAGTAATACCGTATGTGCCCTTCGGGGGAAAGATTTATCGGTAAAGGATCGGCCCGCGTTAGATTAGATAGTTGGTGGGGTAATGGCCTACCAAGTCTACGATCTATAGCTGGTTTGAGAGGATGATCAGCAACACTGGGACTGAGACACGGCCCAGACTCCTACGGGAGGCAGCAGTGGGGAATCTTAGACAATGGGCGCAAGCCTGATCTAGCGATGCCGCGTGAGTGACGAAGGTCTTAGGATCGTAAAGCTCTTTCGCCAGGGATGATAATGACA…	0	0	0	0	0.00340368	0	0	0	0	0	0	0	0	Bacteria	Proteobacteria	Alphaproteobacteria	Rhodobacterales	Rhodobacteraceae	NA
OTU_34153	ACGAACGCTGGCGGTATGCTTAACACATGCAAGTCGAACGAGAAAGCTTCTTCGGAAGTGAGTAGAGTGGCGCACGGGTGAGTAACACGTAGATAACCTGCCCTTTAGCCTGGGACAACCCTTCGAAAGGAGGGCTAATACTGGATAATACCTTTGATCGAGTGGTTAGAGGTTGAAAGATTTATCACTAAGGGATGGGTCTGCGTACCATTAGCTAGTTGGTGGGGTAACGGCCTACCAAGGCTCCGATGGTTAGCGGGTCTGAGAGGATGATCCGCCACACTGGAACTGAGACACGGTCCAGACTCCTACGGGAGGCAGCAGTGGGGAATTTTGCGCAATGGGCGAAAGCCTGACGCAGCAATACCGCGTGAGTGAAGAAGGCCTTTGGGTCGTAAA…	0	0	0	0	0.00340368	0	0	0	0	0	0	0	0	Bacteria	Proteobacteria	Deltaproteobacteria	SAR324_clade(Marine_group_B)	NA	NA
OTU_34155	TTGAACGCTGGCGGCATGGTTAAAACATGCAAGTCGAACGATCCCTTCGGGGAGAGTGGCGAAAGGGCTAGGAATACGATCGAACGTACCCCGAGGTGGAGGATAGCCTGTGGAAACGCAGGGTAATACTCCATGTCCTCTACGGAGAAAAGGTTTACCGCCTTGGGAGCGGCGATCGTCCTATCAGGTAGTTGGTGAGGTAAAGGCTCACCAAGCCGAAGACGGGTAGCGGGTGTGAGAGCATGACCCGCAGCATCGGAACTGAGACACTGTCCGGACTCCTACGGGAGGCTGCAGTAACGAATCTTCCGCAATGCGCGAAAGCGTGACGGAGCAATGCCGCGTGCAGGATGAAGCGTCTACGACGTGTAAACTGCTGTCAGGGTTTAGGAACAATGA…	0	0	0	0	0	0	0.0040032	0	0	0	0	0	0	Bacteria	Planctomycetes	Phycisphaerae	Phycisphaerales	Phycisphaeraceae	SM1A02
OTU_34157	ACGAACGCTGGCGGCACGCCTAACACATGCAAGTCGAGCGCACCTTCGGGTGAGCGGCGGACGGGTTAGTAACGCGTGGGAACATACCCTTCTCTAAGGAATAGCCACTGGAAACGGTGAGTAATACCTTATACGCCCTTCGGGGGAAAGATTTATCGGAGATGGATTGGCCCGCGTTAGATTAGATAGTTGGTGGGGTAACGGCCTACCAAGTCTACGATCTATAGCTGGTTTTAGAGGATGATCAGCAACACTGGGACTGAGACACGGCCCAGACTCCTACGGGAGGCAGCAGTGGGGAATCTTGGACAATGGGCGCAAGCCTGATCCAGCCATGCCGCGTGAGTGAAGAAGGTCTTAGGATCGTAAAGCTCTTTCGCCAGAGATGATAATGACAGT…	0	0	0	0	0	0	0	0.00320718	0	0	0	0	0	Bacteria	Proteobacteria	Alphaproteobacteria	Rhodobacterales	Rhodobacteraceae	Phaeobacter
OTU_34158	ATGAACGCTGGCGGTATGCCTAACACATGCAAGTTGAACGAAAGCTTATGCTTTAGTAGCGGACGGGTGAGTAACGCGTGGGAATATACCTATTGGTAAGGAACAACAGTTGGAAACGACTGCTAATACCTTATACGCCCTTCGGGGGAAAGATTTATCGCCAATAGATTAGCCCGCGTTAGATTAGCTAGTTGGTGAGGTAATGGCTCACCAAGGCGACGATCTATAGCTGGTCTGAGAGGATGATCAGCCACACTGGAACTGAGACACGGTCCAGACTCCTACGGGAGGCAGCAGTGGGGAATATTGGACAATGGGCGCAAGCCTGATCCAGCCATGCCGCGTGAGTGATGAAGGCCTTAGGGTTGTAAAGCTCTTTCAACGGTGAAGATAATGACG…	0	0	0	0	0	0	0	0	0.00558659	0	0	0	0	Bacteria	Proteobacteria	Alphaproteobacteria	Rhizobiales	Phyllobacteriaceae	Ahrensia
OTU_35807	ACGAACGCTGGCGGCAGGCCTAACACATGCAAGTCGAACGCACCTTCGGGTGAGTGGCAGACGGGTGAGGAACACGTGGGAACGTGCCTTTCGGTGGGGGACAACTTCGGGAAACCGGAGCTAATACCGCATACGCCCTTCGGGGGAAAGATTTATCGCCGAAAGATCGGCCCGCGTCTGATTAGCTAGTTGGTGAGGTAACGGCTCACCAAGGCGACGATCAGTAGCTGGTTTGAGAGGATGATCAGCCACACTGGGACTGAGACACGGCCCAGACTCCTACGGGAGGCAGCAGTGGGGAATATTGGACAATGGGCGAAAGCCTGATCCAGCCATGCCGCGTGAGTGACGAAGGCCTTAGGGTTGTAAAACTCTTTCGCCGGCGAAGATAATGACGGT…	0.00436205	0	0	0	0	0	0	0	0	0	0	0	0	Bacteria	Proteobacteria	Alphaproteobacteria	Rhizobiales	Rhodobiaceae	NA
OTU_35808	ATGAACGCTAGCGGCAGGCTTAACACATGCAAGTCGAGGGGTAACAGGATAGCTTGCTATTGCTGACGACCGGCGCACGGGTGCGTAACGCGTATAGAACCTACCTATTACAGGGGAATAGCCCAGAGAAATTTGGATTAATGCCCCATAGTATTTTGTATTGGCCTCAATATAAGATTAAAGATTTATCGGTAGTAGATGGCTATGCGTTCTATTAGTTAGTTGGTAAGGTAAGGGCTTACCAAGACATCGATAGATAGGGGTCCTGAGAGGGAGATCCCCCACACTGGTACTGAGACACGGACCAGACTCCTACGGGAGGCAGCAGTGAGGAATATTGGACAATGGGCGGGAGCCTGATCCAGCCATGCCGCGTGTAGGAAGACTGCCCTATGGGTT…	0.00436205	0	0	0	0	0	0	0	0	0	0	0	0	Bacteria	Bacteroidetes	Flavobacteriia	Flavobacteriales	Flavobacteriaceae	Algitalea
OTU_35809	ACGAACGCTGGCGGCATGCCTAACACATGCAAGTCGAACGAATGCTTCGGCATTAGTGGCGCACGGGTGCGTAACGCGTGGGAACCTGCCTTATAGTAGGGGATAACAACTGGAAACGGTTGCTAATACCCTATACGCTCTTCGGAGGAAAGTTTTTCGCTATAAGATGGTCCCGCGTTAGATTAGCTAGATGGTGAGGTAACGGCTCACCATGGCGACGATCTATAGCTGGTCTGAGAGGATGATCAGCCACACTGGAACTGAGACACGGTCCAGACTCCTACGGGAGGCAGCAGTGGGGAATATTGCACAATGGAGGAAACTCTGATGCAGCAATGCCGCGTGAGTGATGAAGGTCTTCGGATTGTAAAGCTCTTTCAGTCGTGAGGATAATGACAG…	0.00436205	0	0	0	0	0	0	0	0	0	0	0	0	Bacteria	Proteobacteria	NA	NA	NA	NA
OTU_35810	ACGAACGCTGGCGGCAGGCTTAACACATGCAAGTCGAACGCTCCCTTCGGGGAGAGTGGCAGACGGGTGAGTAACGCGTGGGGATATACCTATCGGTAGGGAACAACAGTTGGAAACGACTGCTAATACCTTATACGTCCTTCGGGAGAAAGATTTATCGCCGATAGATTAACCCGCGTTAGATTAGCTAGTTGGTAGGGTAATGGCCTACCAAGGCGACGATCTATAGCTGGTCTGAGAGGATGATCAGCCACACTGGAACTGAGACACGGTCCAGACTCCTACGGGAGGCAGCAGTGGGGAATATTGGGCAATGGGCGCAAGCCTGACCCAGCCATGCCGCGTGTGTGAAGAAGGCTCTAGGGTTGTAAAGCACTTTAAGTAGGGAGGAAAGGGTGT…	0.00109051	0	0	0	0	0	0	0	0	0	0.00141643	0	0.00192308	Bacteria	Proteobacteria	Gammaproteobacteria	Cellvibrionales	Cellvibrionaceae	NA
OTU_35811	ACGAACGCTGGCGGCAGGCCTAACACATGCAAGTCGAGCGCCCCACTTGTGGGGAGCGGCGGACGGGTGAGTAACGCGTGGGAACATGCCCTTTAGTAGAGAATAGCCACTGGAAACGGTGAGTAATACTCTATACGCCCTTCGGGGGAAAGATTTATCGCTAAAGGATTGGCCCGCGTTGGATTAGCTAGTTGGTGGGGTAAAGGCCTACCAAGGCAACGATCTATAGCTGGTCTGAGAGGATGATCAGCCACACTGGGACTGAGACACGGCCCAGACTCCTACGGGAGGCAGCAGTGGGGAATATTGGACAATGGGGGCAACCCTGATCCAGCCATGCCGCGTGAGTGAAGAAGGCCCTAGGGTTGTAAAGCTCTTTCAGATGTGAGGATGATGACA…	0	0.00206398	0	0	0	0	0	0	0	0	0	0	0	Bacteria	Proteobacteria	Alphaproteobacteria	Rhizobiales	Rhodobiaceae	Rhodobium
OTU_35812	ACGAACGCTGGCGGCAGGCTTAACACATGCAAGTCGAGCGCCCTCTTCGGAGGGAGCGGCGGACGGGTTAGTAACGCGTGGGAACGTACCTTTTGCTACGGAATAGCCCAGGGAAACTTGGATTAATACCGTATACGCCCTTTGGGGGAAAGATTTATCGGCGAGAGATCGGCCCGCGTTGGATTAGGTAGTTGGTGGGGTAATGGCCTACCAAGCCGACGATCCATAGCTGGTTTGAGAGGATGATCAGCAACACTGGGACTGAGACACGGCCCAGACTCCTACGGGAGGCAGCAGTGGGGAATCTTGGACAATGGGGGCAACCCTGATCCAGCCATGCCGCGTGGACGATGAAGGCCTTAGGGTTGTAAAGTCCTTTCGCTAGGGAAGATAATGACG…	0	0	0.00395257	0	0	0	0	0	0	0	0	0	0	Bacteria	Proteobacteria	Alphaproteobacteria	Rhodobacterales	Rhodobacteraceae	NA
OTU_35813	ACGAACGCTGGCGGCAGGTCTAACACATGCAAGTCGAACGAACTCTTCGGAGTTAGTGGCGCACGGGTGCGGAACACGTGGGAATGTACCCTCAGGTAAGGAATAACTGCTGGAAACGGTAGCTAATACCTTATAATATCTTCGGATCAAAGATTTATCGCCTGAGGATCAGCCCGCGTCTGATTAGTTTGTTGGTGAGGTAATGGCTCACCAAGACTACGATCAGTAGGGGGTCTGAGAGGATGATCCCCCACACTGGTACTGAGACACGGACCAGACTCCTACGGGAGGCAGCAGTGAAGAATATTGGACAATGGAGGAAACTCTGATCCAGCCATGCCGCGTGAGTGATGACGGCCTTAGGGTTGTAAAGCTCTTTCAATAGTGAAGATAATGACG…	0	0	0.00395257	0	0	0	0	0	0	0	0	0	0	Bacteria	Proteobacteria	Alphaproteobacteria	Alphaproteobacteria_Incertae_Sedis	Unknown_Family	NA
OTU_35814	ACGAACGCTGGCGGCAGGCCTAACACATGCAAGTCGAACGGATCCTTCGGGATTAGTGGCGCACGGGTGAGTAACGCGTGGAAATCTACCTCGGGATGGGGAATAACCATTGGAAACGATGGCTAATACCGCATACGCCGGAAACGGGAAAGCTTTATGCGTCCTGAGATGAGTCCGCGTTAGATTAGATAGTTGGTGGGGTAATGGCCTACCAAGTCGACGATCTATAGCTGGTCTGAGAGGATGATCAGCCACACTGGAACTGAGACACGGTCCAGACTCCTACGGGAGGCAGCAGTGGGGAATATTGGGCAATGGGCGCAAGCCTGACCCAGCCATGCCGCGTGTGTGAAGAAGGCTCTAGGGTTGTAAAGCACTTTAAGTAGGGAGGAAAGGGTG…	0	0	0.000988142	0	0	0	0	0	0	0.00137237	0	0	0	Bacteria	Proteobacteria	Gammaproteobacteria	Cellvibrionales	Cellvibrionaceae	Eionea
OTU_35815	ACGAACGCTGGCGGCAGGCCTAACACATGCAAGTCGAGCGAAGCCTTCGGGCTTAGCGGCGGACGGGTGAGTAACGCGTGGGAACATGCCTTTCGGTACGGAATAGCCCTGGGAAACTGGGAGTAACACCGTATACGCCCTTCGGGGGAAAGTTTACGCCGAGAGATTGGCCCGCGTCTGATTAGATAGTTGGTGGGGTAACGGCCTACCAAGTCTGCGATCAGTACCTGGTTTGAGAGGATGATCAGGCACACTGGGACTGAGACACGGCCCAGACTCCTACGGGAGGCAGCAGTGGGGAATCTTGGACAATGGGGGCAACCCTGATCCAGCCATGCCGCGTGAACGATGAAGGCCTTAGGGTTGTAAAGTTCTTTCGCTGGTGAAGATAATGACGGT…	0	0	0	0	0	0.00270453	0	0	0	0	0	0	0	Bacteria	Proteobacteria	Alphaproteobacteria	Rhodobacterales	Rhodobacteraceae	NA
OTU_35816	ACGAACGCTGGCGGCAGGCCTAACACATGCAAGTCGAGCGATCTCTTCGGAGATAGCGGCGGACGGGTTAGTAACGCGTGGGAACGTACCCAAAGGTACGGAATAGCTTCGGGAAACTGGAGGTAATACCGTATGTGCCCTTCGGGGGAAAGATTTATCGCCTTTGGATCGGCCCGCGTAAGATTAGATAGTTGGTGAGGTAATGGCTCACCAAGTCTACGATCTTTATCTGGTTTGAGAGGATGATCAGAAACACTGGGACTGAGACACGGCCCAGACTCCTACGGGAGGCAGCAGTGGGGAATCTTGGACAATGGGCGCAAGCCTGATCCAGCCATGCCGCGTGAGTGAAGAAGGCCTTAGGGTTGTAAAGCTCTTTCAGGGGTGAGGATTATGACA…	0	0	0	0	0	0	0.00320256	0	0	0	0	0	0	Bacteria	Proteobacteria	Alphaproteobacteria	Rhizobiales	Rhodobiaceae	Rhodobium
OTU_35817	ACGAACGCTGGCGGCAGGCCTAACACATGCAAGTCGAGCGGGAAGGATCTTTCGGGATTTGGACAGCGGCGGACGGGTTAGTAACGCGTGGGAACGTGCCCAGAGGTACGGAATAGCATCGGGAAACTGGTGGTAATACCGTATGTGCCCTTTTTGGGGAAAGATTTATCGCCTTTGGATCGGCCCGCGTAAGATTAGATAGTTGGTGAGGTAATGGCTCACCAAGTCTACGATCTTTATCTGGTTTGAGAGGATGATCAGAAACACTGGGACTGAGACACGGCCCAGACTCCTACGGGAGGCAGCAGTGGGGAATCTTGGACAATGGGCGCAAGCCTGATCCAGCCATGCCGCGTGAGTGAAGAAGGCCTTAGGGTTGTAAAGCTCTTTCAGGGGTGA…	0	0	0	0	0	0	0.00320256	0	0	0	0	0	0	Bacteria	Proteobacteria	Alphaproteobacteria	Rhizobiales	Rhodobiaceae	Rhodobium
OTU_35819	TTGAACGCTGGCGGCACGCTTTACACATGCAAGTCGAGCGGCAGCGCGGGGTTTCGGCCCTGGCGGCGAGCGGCGGACGGGTGAGTAACGCATGGGAACGTGTCCGAAGGTGCGGAACAGCCCTGGGAAACCAGGATTAATGCCGCATGATCTCTACGGAGCAAAGCGGGGGACCGGCTTGCCGGCCTCGCGCCTTCGGAGCGGCCCATGTCCGATTAGGTTGTTGGCGGGGTAACGGCCCACCAAGCCTGCGATCGGTAGCTGGTCTGAGAGGATGATCAGCCACACCGGGACTGAGACACGGCCCGGACTCCTACGGGAGGCAGCAGTGGGGAATATTGGACAATGAGCGAAAGCTTGATCCAGTTAAATTACATGTACGAAGACAATATTTAATTT…	0	0	0	0	0	0	0	0	0	0.00182983	0	0	0	Bacteria	Proteobacteria	Gammaproteobacteria	NA	NA	NA
OTU_35821	ATGAACGCTGGCGGTATGCCTAACACATGCAAGTTGAACGAAAGCTTATGCTTTAGTGGCGGACGGGTGAGTAATGCATGAGAATCTGCCTTTAGGAAAGGAATAACAATTGGAAACGACTGCTAATACCTTATATGCTATTTATAGTGAAAAGAGTAATCTGCCTAGAGATGAGCTCATGTCTGATTAGCTAGTTGGTGGGGTAAAGGCTTACCAAGGCGACGATCAGTAGCTGGTTTGAGAGGATGATCAGCCACACTGGGACTGAGACACTGCCCAGACACCTACGGGTGGCTGCAGTCGAGAATCTTCGGCAATGGACGAAAGTCTGACCGAGCGACGCCGCGTGCGGGATGAAGGCCCTCGGGTTGTAAACCGCTGTCAGTTGGGAGGAAAGCT…	0	0	0	0	0	0	0	0	0	0.00182983	0	0	0	Bacteria	Planctomycetes	Planctomycetacia	Planctomycetales	Planctomycetaceae	Thermostilla
OTU_35822	GTGAACGCTAGCAGTATGCTTGACACATGCAAGTCGAACGTAGCTTTTTAGCTAAGTGGCGCACGGGTGAGTAATACAAGGGAACCTACCACGCAGTTTGGTTTAAGATAATTTTATTGTATAGATACCAAATATATCTACATTCAGGTAGGTGAAAGATTAATCGCTGTGTTATGGGCCCTTGTAGGATTAGGTAGTTGGTAGTTTAAAAGACATACCAAGCCAAAGATCCTTAGTTGGTCTGAGAGGATGATCAGCCACGTTGGGACTGAAATAAGGCCCAGGCTTCCGTGGAGGGCAGCAGTGAGGAATATTGGACAATGGGCGCAAGCTTGATCCAGCAATACTGAATAGGCGAAGAAGGCAATTTGTTGTAACGTCTGTAAACTGAGGAGGATA…	0	0	0	0	0	0	0	0	0	0	0.00283286	0	0	Bacteria	Proteobacteria	NA	NA	NA	NA
OTU_35823	ATGAACGCTGGCGGCGTGCCTAACACATGCAAGTCGAACGGGAAATCACCTTCGGGTGATGGAGAGTGGCGAACGGGTGAGTAACACGTAGCTAATCTACCCTTAAGACGAGGATAACTATTGGAAACAGTAGCTAATACTCGATAAGCTCCCATCGAATAGAGAGATGAGAGAAAAGTTCAGGCGCTTAAGGATGAGGCTGCGAACCATCAGCTAGTTGGTAAGGTAAAGGCTTACCAAGGCGACGACGGTTAGGGGACCTGAGAGGGTGACCCCCCACACTGGAACTGAGACACGGTCCAGACTTCTACGGAAGGCAGCAGTGAGGAATATTGCACAATGGGCGAAAGCCTGATGCAGCGACGCCGCGTGGGTGAAGACGGATTTCGGTCTGTAAAG…	0	0	0	0	0	0	0	0	0	0	0.00283286	0	0	Bacteria	Chloroflexi	Anaerolineae	Anaerolineales	Anaerolineaceae	NA
OTU_35825	ACGAACGCTGGCGGCACGCCTAACACATGCAAGTCGAGCGCACCCTTCGGGGCGAGCGGCGGACGGGTTAGTAACGCGTGGGAACGTACCCAGATCTACGGAATAGCCTCGGGAAACTGAGAGTAATACCGTATACGCCCTTCGGGGGAAAGATTTATCGGATTTGGATCGGCCCGCGTTAGATTAGATAGTTGGTGGGGTAACGGCCTACCAAGTCTACGATCTATAGCTGGTTTTAGAGGATGATCAGCAACACTGGGACTGAGACACGGCCCAGACTCCTACGGGAGGCAGCAGTGGGGAATCTTAGACAATGGGCGAAAGCCTGATCTAGCGATGCCGCGTGAGTGATGAAGGCCTTAGGGTCGTAAAGCTCTTTCGCCAGGGATGATAATGACA…	0	0	0	0	0	0	0	0	0	0	0	0.00245399	0	Bacteria	Proteobacteria	Alphaproteobacteria	Rhodobacterales	Rhodobacteraceae	NA
OTU_35827	ATGAACGCTGGCGGTATGCCTAACACATGCAAGTTGAACGAAAGCTTATGCTTTAGTGGCGGACGGGTGAGTAATGCATGAGAATCTGCCTTTAGGAAAGGAATAACAATTGGAAACGACTGCTAATACCTTATATGCTATTTATAGTGAAAAGAGTAATCTGCCTAGAGATGAGCTCATGTCTGATTAGCTAGTTGGTGGGGTAAAGGCTTACCAAGGCGACGATCAGTAGCTGGTTTGAGAGGATGATCAGCCACACTGGGACTGAGATACGGCCCAGACTCCTACGGGAGGCAGCAGTGGGGAATTTTGGACAATGGGCGCAAGCCTGATCCAGCCATGCCGCGTGCGGGAAGAAGGCCTTCGGGTTGTAAACCGCTTTTGTCAGGGAAGAAAAGG…	0	0	0	0	0	0	0	0	0	0	0	0.00245399	0	Bacteria	Proteobacteria	Betaproteobacteria	NA	NA	NA
OTU_35828	ACGAACGCTGGCGGCAGGCTTAACACATGCAAGTCGAACGGTCTCTTCGGAGGCAGTGGCAGACGGGTGAGTAACGCGTGGGAAATTACCTATCAGTAGGGGACAACAGTTGGAAACGACTGCTAATACCTTATACGCCCTTTTGGGGAAAGATTCATCGCTGATAGATGTGCCCGCGTTAGATTAGCTAGTTGGTGAGGTAATGGCTCACCAAGGCGACGATCTATAGCTGGTCTGAGAGGATGATCAGCCACACTGGGACTGAGACACGGCCCAGACTCCTACGGGAGGCAGCAGTGGGGAATATTGGACAATGGGCGCAAGCCTGATCCAGCCATGCCGCGTGAGTGATGAAGGCCTTAGGGTTGTAAAGCTCTTTCAACGGTGAAGATAATGACG…	0	0	0	0	0	0	0	0	0	0	0	0.00245399	0	Bacteria	Proteobacteria	Alphaproteobacteria	Rhizobiales	Phyllobacteriaceae	Ahrensia
OTU_8250	ACGAACGCTGGCGGCAGGCTTAACACATGCAAGTCGAACGGTCTCTTCGGAGGCAGTGGCAGACGGGTGAGTAACGCGTGGGAACCTACCTATTTCTACGGAACAACAGTTGGAAACGACTGCTAATACCGTATACGCCCTTCGGGGGAAAGATTTATCGGAAATAGATGGGCCCGCGTTAGATTAGCTAGTTGGTGAGGTAATGGCTCACCAAGGCGACGATCTATAGCTGGTCTGAGAGGATGATCAGCCACACTGGAACTGAGACACGGTCCAGACTCCTACGGGAGGCAGCAGTGGGGAATATTGGGCAATGGGCGCAAGCCTGACCCAGCCATGCCGCGTGTGTGAAGAAGGCTCTAGGGTTGTAAAGCACTTTAAGTAGGGAGGAAAGGGTGT…	0	0	0	0	0	0	0	0	0	0	0	0.00184049	0	Bacteria	Proteobacteria	Alphaproteobacteria	Rhizobiales	Phyllobacteriaceae	NA
OTU_37634	ACGAACGCTGGCGGCAGGCCTAACACATGCAAGTCGAGCGCACCCTTCGGGGCGAGCGGCGGACGGGTTAGTAACGCGTGGGAACGTGCCCTTTTCTAAGGAATAGCCACTGGAAACGGTGAGTAATACCTTATACGCCCTTTTGGGGAAAGATTTATCGGAGAAGGATCGGCCCGCGTTAGATTAGATAGTTGGTGGGGTAATGGCCTACCAAGTCTACGATCTATAGCTGGTTTTAGAGGATGATCAGCAACACTGGGACTGAGACACGGCCCAGACTCCTACGGGAGGCAGCAGTGGGGAATCTTAGACAATGGGCGCAAGCCTGATCTAGCCATGCCGCGTGTGTGATGAAGGCCCTAGGGTCGTAAAGCACTTTCGCCAGGGATGATAATGACA…	0.00109051	0	0	0	0	0	0.00160128	0	0	0	0	0	0	Bacteria	Proteobacteria	Gammaproteobacteria	NA	NA	NA
OTU_37635	ACGAACGCTGGCGGCAGGCCTAACACATGCAAGTCAAGGGGTCCTTCGGGACACCGGCGCACGGGTGCGTAACACGTGGGAATATACCCCTAGGTAAGGAATAACTATTGGAAACGATAGCTAATACCTTATAATATCTTCGGATCAAAGATTTATCGCCTAGGGATTAGCCCGCGTCTGATTAGATTGTTGGTGAGGTAATGGCTCACCAAGTCTACGATCAGTAGCTGGTCTGAGAGGATGATCAGCCACACTGGAACTGAGACACGGTCCAGACTCCTACGGGAGGCAGCAGTGAGGAATATTGCGCAATGGGGGAAACCCTGACGCAGCCATGCCGCGTGAGTGAAGAAGGCCTTAGGGTTGTAAAGCTCTTTCAATTGTGAAGATAATGACGGT…	0	0	0.00296443	0	0	0	0	0	0	0	0	0	0	Bacteria	Proteobacteria	Alphaproteobacteria	Rhodobacterales	Rhodobacteraceae	NA
OTU_37636	ATGAACGCTAGTAGTATGCTTTACACATGCAAGTTTCACGGAGTTTTTCGTAGCGAACGGGTGAGGATAATACAGAATGTTACCTTTTAGACTAGAACAAACTTTTCAATTTTTTGAAATCAAATTCTAGATACTATTAAAGGGTTTAAAATTTATTCCGCTAAAAGATAGGTCTGTAGAAGATTAGGTTGTTGGTAGATGTAAAAGCCTACCAAGCCTGCGATCTTTAGTTGGTCTTAGAGGACGATCAACCACATTGGAACTGAAATAAGGTTCAAGCTGATTTTTTCGGCCAGCAGTGAGGAATATTGGACAATGGACGAAAGTCTGATCCAGCAATACTACATGAATGATGACGGCGAGTTTAGTTGTAAAGTTCTTTCATTAAAAATGATAATG…	0	0	0.00296443	0	0	0	0	0	0	0	0	0	0	Bacteria	Proteobacteria	Alphaproteobacteria	Alphaproteobacteria_Incertae_Sedis	Unknown_Family	NA
OTU_37637	ATGAACGCTAGTAGTATGCTTAACACATGCAAGTTGAACGAAATTTTTCGTAGCGAACGGGTGAGGAGAATACAGAATGCTACCTTTTAGTTTAGAACAATGAATATTTCGTAAGAAACATTTAAATACTAAATAATAAATAAAGGTTATATTTTAATGATATAGTCCGTTAAAAGATGGGTCTGTATAAGATTAGGTAGTTGGTAATTTTAATCGCTTACCAAGCCTTCGATCTTTAGTTGGTCTTAGAGGATGATCAACCACACTGGAACTGAAATAAGGTCCAGGCTGAATTTTCGGCCAGCAGTGAGGAATATTGGACAATGAACGAAAGTTTGATCCAGCAATACTATCTGAATGAAGACGGCTTTTTTTAGTTGTAAAGTTCTTTCGTTAAGA…	0	0	0.00296443	0	0	0	0	0	0	0	0	0	0	Bacteria	Proteobacteria	Alphaproteobacteria	Rickettsiales	Mitochondria	NA
OTU_37638	GCGATCGTTGGCGGCAGGCCTAACACATGCAAGTCGAACGACCTCTATATGAGGGAGTGGCGGACGGGTGAGTACAAATTGGGAACATGCCTTTTGCTGGGGGATAACTGTTGGAAACAGCAGCTAATACCGCATATGCCTTCGGGTAAAAGCTCCGGCGGCAAAAGATTGGCCCAATTTTCATTAGCTTGTTGGTGAGGTAAAAGCTCACCAAGGCTACGATGAATAGCTGGTCTGAGAGGATGATCAGCCACACTGGAACTGAGACACGGTCCAGACTCCTACGGGAGGCAGCAGTGAGGAATATTGCGCAATGGAGGAAACTCTGACGCAGCCATGCCGCGTGCACGACGAAGGCCCTAGGGTTGTAAAGTGCTTTCAATGGGGAAGATGATGACG…	0	0	0.00296443	0	0	0	0	0	0	0	0	0	0	Bacteria	Proteobacteria	Alphaproteobacteria	Rickettsiales	Mitochondria	NA
OTU_37639	ACGAACGCTGGCGGCAGGCCTAACACATGCAAGTCGAACGAAGTCTTCGGACTTAGTGGCGCACGGGTGAGTAACACGTGGGAATCTACCTTTGAGTTGGGAATAACCATTGGAAACGATGGCTAATACCCAATACGTCCTTCGGGAGAAAGATTTATCGCTCAGAGATGAGCCCGCGTCCAATTAGCTAGTTGGTGAGGTAAAAGCTCACCAAGGCGACGATTGGTAGCTGTTCTGAGAGGAAGATCAGCCACACTGGTACTGAGACACGGACCAGACTCCTACGGGAGGCAGCAGTGGGGAATATTGGACAATGGGGGAAACCCTGATCCAGCCATGTCGCGTGAATGATGAAGGCCTTAGGGTTGTAAAGTTCTTTCAACGGTGAAGATGATGACA…	0	0	0.00296443	0	0	0	0	0	0	0	0	0	0	Bacteria	Proteobacteria	Alphaproteobacteria	Rhodospirillales	Rhodospirillaceae	Aestuariispira
OTU_37640	ACGAACGCTGGCGGCAGGCCTAAAACATGCAAGTCGAGCGAAACCTTCGGGTTGAGCGGCGCACGGGTGAGTAACGCGTGGGAATATGCCCTTCACTGCGGAATAACGTTTGGAAACGAACGCTAATACCGCATAATGTCTTCGGACCAAAGATTTATCGGTGAAGGATTAGCCCGCGTTAGATTAGATAGTTGGTGGGGTAAAAGCCTACCAAGTCGACGATCTATAGCTGATTTGAGAGGATGATCAGCCACACTGGTACTGAGACACGGACCAGACTCCTACGGGAGGCAGCAGTTAGGAATATTGGACAATGGGCGCAAGCCTGATCCAGCCATGCCGCGTGAGTGAAGACGGCCTTAGGGTTGTAAAGCTCTTTCAGATGTGAGGATAATGACA…	0	0	0	0.00125997	0	0	0	0	0	0	0	0	0	Bacteria	Proteobacteria	Alphaproteobacteria	Rhodospirillales	Rhodospirillaceae	Tistlia
OTU_37642	ATGAACGCTGGCGGTATGCCTAACACATGCAAGTTGAACGAAAGCTTATGCTTTAGTAGCGGACGGGTGAGTAACGCATGAGAATCTGCCTCTAGGAAAGGAATAACAATTGGAAACGACTGCTAATACCTTATATGCTATTTATAGTGAAAAGAGTAATCTGCCTAGAGATGAGCTCATGTCTGATTAGCTAGTTGGTAAGGTAAAGGCTTACCAAGGCAACGATCAGTAGCTGGTTTGAGAGGACGATCAGCCACACTGGGACTGAGATACGGCCCAGACTTCTACGGAAGGCAGCAGTGGGGAATCTTAGACAATGGGGGAAACCCTGATCTAGCCATGCCGCGTGATCGATGACGGCCTTAGGGTTGTAAAGATCTTTCGCCGGGGACGATAATG…	0	0	0	0	0	0	0.00240192	0	0	0	0	0	0	Bacteria	Proteobacteria	Alphaproteobacteria	Alphaproteobacteria_Incertae_Sedis	NA	NA
OTU_37643	ACGAACGCTGGCGGCAGGCCTAACACATGCAAGTCGAAGGAGAAGTTTCTCTTCGGAGAAGTGGACACTGGCGCACGGGTGAGTAACGCGTGGGGATCTACCCCGGGGTGGGGGACAACCGCTGGAAACGGCGGCTAATACCGCATACGCCTTAAGAGGGAAAGCTTTAGCGCCCTGGGATGAACCCGCGTTAGATTAGGTAGTTGGTGGGGTAATGGCCTACCAAGCCGACGATCTATAGCTGGTCTGAGAGGATGATCAGCCACACTGGAACTGAGACACGGTCCAGACTCCTACGGGAGGCAGCAGTGGGGAATATTGGGCAATGGGCGCAAGCCTGACCCAGCCATGCCGCGTGTGTGAAGAAGGCTCTAGGGTTGTAAAGCACTTTAAGTAGGG…	0	0	0	0	0	0	0	0	0.00335196	0	0	0	0	Bacteria	Proteobacteria	NA	NA	NA	NA
OTU_37644	ACGAACGCTGGCGGCATGCTTAACACATGCAAGTCGAACGATGAAGCGGATTTATTCGTGGAAGAGTGGCAGACGGGTGAGTAACGCGTGGGAATGTACCCTTCAGTTCTGGACAACCACTGGAAACGGTGGCTAATACAGAATACGACCGAGAGGTGAAAGGTTTACTGCTGAGGGAGCAGCCCGCGTTAGATTAGGTAGTTGGTAGGGTAAAAGCCTACCAAGCCGATGATCTATAGCTGGTTTGAGAGGACGATCAGCCACACTGGGACTGAGACACGGCCCAGACTCCTACGGGAGGCAGCAGTGGGGAATATTGGACAATGGGGGCAACCCTGATCCAGCAATGCCGCGTGCGTGATGAAGGCCTTAGGGTTGTAAAGCGCTTTTCTTGGGGAA…	0	0	0	0	0	0	0	0	0	0.00137237	0	0	0	Bacteria	Proteobacteria	NA	NA	NA	NA
OTU_37645	ACGAACGCTGGCGGCAGGCTTAACACATGCAAGTCGAACGCCCTCTTCGGAGGGAGTGGCAGACGGGTGAGTAACGCGTGGGAAACTACCTATCAGTACGGAACAACAGTTAGAAATGACTGCTAATACCGTATACGTCCTTCGGGAGAAAGATTTATCGCTGATAGATGTGCCCGCGTTAGATTAGCTAGTTGGTGAGGTAATGGCTCACCAAGGCGACGATCTATAGCTGGTCTGAGAGGATGATCAGCCACACTGGGACTGAGACACGGCCCAGACTCCTACGGGAGGCAGCAGTGGGGAATATTGGACAATGGGCGCAAGCCTGATCCAGCCATGCCGCGTGAGTGATGAAGGCCTTAGGGTTGTAAAGCTCTTTCAACGGTGAAGATAATGACG…	0	0	0	0	0	0	0	0	0	0	0.00212465	0	0	Bacteria	Proteobacteria	Alphaproteobacteria	Rickettsiales	Rickettsiales_Incertae_Sedis	NA
OTU_39976	ACGAACGCTGGCGGCGTGCTTAACACATGCAAGTCGAACGAGAAACTCACTTCGGTGAGTGGACAGTGGCAGACGGGTGAGTAACGCGTGGCAACCTACCCTTCACTACGGGACAACAGTTGGAAACGACTGCTAATACCGTATACGTCCTCCGGGAGAAAGATTTATCGGTGATGGATGGGGCCGCGTTAGATTAGCTAGTTGGTAGGGTAATGGCCTACCAAGGCGACGATCTATAGCTGGTCTGAGAGGATGATCAGCCACACTGGGACTGAGACACGGCCCAGACTCCTACGGGAGGCAGCAGTGGGGAATATTGGACAATGGGCGCAAGCCTGATCCAGCCATGCCGCGTGAGTGATGAAGGCCCTAGGGTTGTAAAGCTCTTTCAACGGTGAA…	0.00218103	0	0	0	0	0	0	0	0	0	0	0	0	Bacteria	Proteobacteria	Alphaproteobacteria	Caulobacterales	Hyphomonadaceae	NA
OTU_39978	ATGAACGCTGGCGGCGTGCTTAACACATGCAAGTCGAACGAGGTCTTCGGACCAAGTGGCGGACGGGTGAGTAACGCGTGAGTATCTGCCCTAAGGCGGGGGACAACCATTGGAAACGATGGCTAATACCCCATATGCCGAGAGGTGAAAGGTTTACTGCCTTAGGATGAGCTCGCGTCTGATTAGCTAGATGGTGGGGTAACGGCTTACCATGGCGACGATCAGTAGCTGGTCTGAGAGGATGATCAGCCACACTGGGACTGAGACACGGCCCAGACTCCTACGGGAGGCAGCAGTGGGGAATATTGGACAATGGGCGCAAGCCTGATCCAGCAATACCTCGTGTGTGAAGAAGGCCTTAGGGTTGTAAAGCACTTTCAATTGGGACGAAGGTTGGTA…	0.00218103	0	0	0	0	0	0	0	0	0	0	0	0	Bacteria	Proteobacteria	Gammaproteobacteria	Arenicellales	Arenicellaceae	Perspicuibacter
OTU_39979	ATGAACGCTAGCGGCAGGCTTAACACATGCAAGTCGAGGGGTAACAGGATAGCTTGCTATTGCTGACGACCGGCGCACGGGTGCGTAACGCGTATAGAACCTACCTACTACAGGGGAATAGCCCAGAGAAATTTGGATTAATGCCCCATAGTATTTTGTATTGGCCTCAATACAAGATTAAAGATTTATCGGTAGTAGATGGCTATGCGTTCTATTAGTTAGTTGGTAAGGTAAGGGCTTACCAAGACATCGATAGATAGGGGTCCTGAGAGGGAGATCCCCCACACTGGTACTGAGACACGGACCAGACTCCTACGGGAGGCAGCAGTGAGGAATATTGGACAATGGGCGGGAGCCTGATCCAGCCATGCCGCGTGTAGGAAGACTGCCCTATGGGTT…	0.00218103	0	0	0	0	0	0	0	0	0	0	0	0	Bacteria	Bacteroidetes	Flavobacteriia	Flavobacteriales	Flavobacteriaceae	Algitalea
OTU_39980	ATGAACGCTAGCGGCAGGCCTAACACATGCAAGTCGAGGGGTAACATTCTGTGCTTGCACAGAGATGACGACCGGCGCACGGGTGCGCACCGCGTATGGAATCTGCCCTGTACAGGGGAATAGCCTTTGGAAACGAAGATTAATGCCCCATGGTACCTTTAGCAGCATTGCTGGAAGGTTAAAGGCTTCGGCCGGTACGGGATGACCATGCGTCCCATTAGCTCGATGGTAAGGTAACGGCTTACCATGGCTACGATGGGTAGGGGCCCTGAGAGGGGGATCCCCCACACTGGTACTGAGACACGGACCAGACTCCTACGGGAGGCAGCAGTGAGGAATATTGGACAATGAGCGAAAGCTTGATCCAGTTAAATTACATGTACGAAGACAATATTTAAT…	0.00218103	0	0	0	0	0	0	0	0	0	0	0	0	Bacteria	Bacteroidetes	Flavobacteriia	Flavobacteriales	Flavobacteriaceae	NA
OTU_39981	ATGAACGCTGGCGGCGTGCTTAACACATGCAAGTCGAACGAATCCTTCGGGATGAGTGGCGGACGGGTGAGTAACGCGTGAGTATCTGCCCTAAGGCGGGGGACAACCATTGGAAACGATGGCTAATACCCCATATGCCGAGAGGTGAAAGGTTTACTACCTTGGGATGAGCTCGCGTCTGATTAGCTAGATGGTGGGGTAATGGCCTACCATGGCGACGATCAGTAGCTGGTCTGAGAGGATGATCAGCCACACTGGGACTGAGACACGGCCCAGACTCCTACGGGAGGCAGCAGTGGGGAATATTGGACAATGGGCGCAAGCCTGATCCAGCAATACCTCGTGTGTGAAGAAGGCCTTAGGGTTGTAAAGCACTTTCAATTGGGACGAAGGTTGGTA…	0.00218103	0	0	0	0	0	0	0	0	0	0	0	0	Bacteria	Proteobacteria	Gammaproteobacteria	Arenicellales	Arenicellaceae	Perspicuibacter
OTU_39982	ACGAACGCTGGCGGCAGGCTTAACACATGCAAGTCGAGCGCCCACTTCGGTGGGAGCGGCAGACGGGTGAGTAACGCGTGGGAATATACCTATCTCTAGGGAACAACAGTTGGAAACGACTGCTAATGCCTTATACGCCCTTCGGGGGAAAGATTTATCGGAGATAGATTAGCCCGCGTTAGATTAGCTAGTTGGTGAGGTAATGGCTCACCAAGGCGACGATCTATAGCTGGTCTGAGAGGATGATCAGCCACACTGGGACTGAGACACGGCCCAGACTCCTACGGGAGGCAGCAGTGGGGAATCTTGCACAATGGGCGAAAGCCTGATGCAGCCATGCCGCGTGAATGATGAAGGCCCTAGGGTTGTAAAATTCTTTCGCCAGGGATGATAATGACA…	0.00218103	0	0	0	0	0	0	0	0	0	0	0	0	Bacteria	Proteobacteria	Alphaproteobacteria	Caulobacterales	Hyphomonadaceae	NA
OTU_39983	ACGAACGCTGGCGGCATGCCTAACACATGCAAGTCGAACGAACCCTTCGGGGTGAGTGGCGCACGGGTGCGTAACGCGTGGGAACCTGCCCTTAGGTTCGGAATAACAGTGAGAAATCGCTGCTAATACCGGATAATGTCTTCGGACCAAAGATTTATCGCCTTTGGATGGGCCCGCGTTAGATTAGGTAGTTGGTGAGGTAATGGCTCACCAAGCCGACGATCTATAGCTGGTCTTAGAGGATGATCAGCCACACTGGGACTGAGACACGGCCCAGACTCCTACGGGAGGCAGCAGTGGGGAATATTGGACAATGGGCGAAAGCCTGATCCAGCAATGCCGCGTGAGTGATGAAGGCCTTAGGGTTGTAAAGCTCTTTTACCAGGGATGATAATGACA…	0	0.00103199	0	0	0	0	0	0	0	0	0	0	0	Bacteria	Proteobacteria	Alphaproteobacteria	Sphingomonadales	Erythrobacteraceae	Erythrobacter
OTU_39984	ATCAACGCTGGCGGCGTGCCTCAGACATGCAAGTCGAACGAGAACGTTATCTTCGGATAGCTACTAAAGTGGCGTACGGGAGAGTAACACGTAAGTAATCTACCTTTTGGGTGGGGAATAACTTAGGGAAACTTAAGCTAATACCGCATAATGCAGCAATTTCATATGGAGTAGTTGCTAAAGAATTTATTCGCCTAAAGAGGAGCTTGCGGCAGATTAGCTAGTTGGTAAGGTAATGGCTTACCAAGGCAACGATCTGTAGCCGGTCTAAGAGGACGGTCGGTCTCACTGACACTGAATAACGGGTCAGACTCCTACGGGAGGCAGCAGTCGGGAATTTTGCGCAATGGGGGAAACCCTGACGCAGCAACGCCGCGTGAAGGATGAAGTCTTTCGGGA…	0	0.00103199	0	0	0	0	0	0	0	0	0	0	0	Bacteria	Acidobacteria	Blastocatellia	Blastocatellales	Blastocatellaceae_(Subgroup_4)	Blastocatella
OTU_39985	ACGAACGCTGGCGGCAGGCTTAACACATGCAAGTCGAGCGCCCTGCTTGCAGGGAGCGGCAGACGGGTGAGTAACGCGTGGGAATGTACCTTTCAGTACGGAACAACAGTTAGAAATGACTGCTAATACCGTATACGCCCTCCGGGGGAAAGATTTATCGCTGAAAGATCAGCCCGCGTTAGATTAGCTTGTTGGTGAGGTAACGGCTCACCAAGGCTACGATCTATAGCTGGTCTGAGAGGATGATCAGCCACACTGGAACTGAGACACGGTCCAGACTCCTACGGGAGGCAGCAGTGGGGAATATTGGGCAATGGGCGCAAGCCTGACCCAGCCATGCCGCGTGTGTGAAGAAGGCTCTAGGGTTGTAAAGCACTTTAAGTAGGGAGGAAAGGGTGT…	0	0	0.00197628	0	0	0	0	0	0	0	0	0	0	Bacteria	Proteobacteria	Gammaproteobacteria	NA	NA	NA
OTU_39986	ACGAACGCTAGAAGTATGCTTAACACATGCAAGTTTAACGAAATTTAAATTTCGTAGCGTACGGGTGAGTAATAGCAGAATTTTACCTTTTAGTTCAGCACAAAGACTTTTATAAGTTTAAATACTGAATATTTTCAAAGGTTAATAATTTTCCGCTAAAAGATAAATCTGCATAAGATTATGGTTGTTGGTGATTTAAAAGCTTACCAAGCCTATGATCTTTAGTTGGTCTGAGAGGATGATCAACCACACTAGAACTGAAACAAGGTTTAGGCTGAATTTTCGGCCAGCAGTGAGGAATATTGGACAATGAGCGAAAGCTTGATCCAGCAATACTAACTGGGTGATGACGGCTTATTTAAGTTGTAAAGCCCTTTCATTAAAGAAGATAATGACATT…	0	0	0.00197628	0	0	0	0	0	0	0	0	0	0	Bacteria	Proteobacteria	Alphaproteobacteria	Rickettsiales	Mitochondria	NA
OTU_39988	GTGAACGCTAATAGTATGCTTTACACATGCAAGTTGAACGGAACTGTGTTTCGTAGCGTACGGGTGAGTAATGAGCAGACATCTACCTTCTAGTTCAGGATAAAAAACTCTAAATCCTGGATAATCAATAAAGGTCTGTGTTTTAGAAAGACACATTCCGCTAGAAGTCGATTTTGCCTAAGATTAGGTTGTTGGTGTATTTGACAGCTCACCAAGCCTGCGATCTTTAGTTGGTCTTAGCGGTCGATCAACCACACTGGAACTGAAATAAGGTCCAGGCTGAATTTCGGCCAGCAGTGAGGAATATTGGACAATGGGCGCAAGCCTGATCCAGCAATACCTCGTGTGTGAAGAAGGCCTTAGGGTTGTAAAGCACTTTCAATTGGGACGAAGGTTGGT…	0	0	0.00197628	0	0	0	0	0	0	0	0	0	0	Bacteria	Proteobacteria	Gammaproteobacteria	NA	NA	NA
OTU_39989	ACGAACGCTGGCGGCAGGCCTAACACATGCAAGTCGAGCGCACCTTCGGGTGAGCGGCGGACGGGTTAGTAACGCGTGGGAATATACCCTTCACTACGGAATAGCCTCGGGAAACTGAGAGTAATACCGTATACGCCCTTCGGGGGAAAGATTTATCGGTGATGGATTAGCCCGCGTCTGATTAGATAGTTGGTGGGGTAACGGCCTACCAAGTCTACGATCAGTAGCTGGTTTGAGAGGATGATCAGCAACACTGGGACTGAGACACGGCCCAGACTCCTACGGGAGGCAGCAGTGGGGAATCTTAGACAATGGGCGCAAGCCTGATCCAGCAATACCTCGTGTGTGAAGAAGGCCTTAGGGTTGTAAACCTCTTTTTTTAGGAAAGAAAAATTGACG…	0	0	0.00197628	0	0	0	0	0	0	0	0	0	0	Bacteria	Proteobacteria	Alphaproteobacteria	Rhodobacterales	Rhodobacteraceae	NA
OTU_39990	ATGAACGCTGGCGGTATGCCTAACACATGCAAGTTGAACGAAAGCTTATGCTTTAGTAGCGGACGGGTGAGTAACGCGTGGGAACGCGTCTTCTGGTTCGGAATAACCCTGGGAAACTAGGGCTAATACCGGATACGCCCTTTTGGGGAAAGGTTTACTGCCGGAAGATCGGCCCGCGTCTGATTAGCTAGTTGGTGGGGTAACGGCCTACCAAGTCTACGATCTATAGCTGGTTTTAGAGGACGATCAGCCACACTGGGACTGAGACACGGCCCAGACTCCTACGGGAGGCAGCAGTGGGGAATCTTAGACAATGGGCGAAAGCCTGATCTAGCCATGCCGCGTGAGTGATGAAGGCCCTAGGGTCGTAAAGCTCTTTCGCCAGGGATGATAATGACA…	0	0	0.00197628	0	0	0	0	0	0	0	0	0	0	Bacteria	Proteobacteria	Alphaproteobacteria	Rhodobacterales	Rhodobacteraceae	NA
OTU_39991	ACGAACGCTGGCGGCAGGCCTAACACATGCAAGTCGAACGAACCCTTCGGGGTGAGTGGCGCACGGGTGCGTAACACGTGGGAATATGCCTCTTGGTAAGGAACAACATCTGGAAACGGGTGCTAATACCTTATAATGACTCCGGTCCAAAGATTTATCGCCAAGAGATTAGCCCGCGCCTGATTAGGTAGTTGGTGAGGTAAGAGCTCACCAAGCCGACGATCAGTAGCTGGTCTGAGAGGATGATCAGCCACACTGGAACTGAGACACGGTCCAGACTCCTACGGGAGGCAGCAGTGGGGAATATTGGGCAATGGGCGCAAGCCTGACCCAGCCATGCCGCGTGTGTGAAGAAGGCTCTAGGGTTGTAAAGCACTTTAAGTAGGGAGGAAAGGGTGT…	0	0	0	0.000839983	0	0	0	0	0	0	0	0	0	Bacteria	Proteobacteria	Alphaproteobacteria	Alphaproteobacteria_Incertae_Sedis	NA	NA
OTU_39992	TTGAACGCTGGCGGCAGGCCTAACACATGCAAGTCGAGCGAGAAAGCCTTCGGGTGAGTACAGCGGCGGACGGGTGAGTAACGCGTGGGAATCTACCAAGTAGTGGGGGACAACAGTTGGAAACGGCTGCTAATACCGCATACGCCCTACGGGGGAAAGCAGGGGATCTTCGGACCTTGTGCTATTTGATGAGCCCGCGTTAGATTAGCTAGATGGTGGGGTAAAGGCCTACCATGGCGACGATCTATAGCTGGTCTGAGAGGATGATCAGCCACACTGGAACTGAGACACGGTCCAGACTCCTACGGGAGGCAGCAGTGGGGAATATTGGGCAATGGGCGCAAGCCTGACCCAGCCATGCCGCGTGTGTGAAGAAGGCTCTAGGGTTGTAAAGCTCTT…	0	0	0	0.000839983	0	0	0	0	0	0	0	0	0	Bacteria	Proteobacteria	Gammaproteobacteria	Cellvibrionales	Cellvibrionaceae	Candidatus_Endobugula
OTU_39993	ACGAACGCTGGCGGCAGGCCTAACACATGCAAGTCGAGCGCACCTTCGGGTGAGCGGCGAACGGGTTAGTAACGCGTGGGAACGTGCCCTTCTCTAAGGAATAGCCTCTGGAAACGGAGAGTAATACCTTATACGCCCTTTGGGGGAAAGATTTATCGGAGAAGGATCGGCCCGCGTTGGATTAGGTAGTTGGTGAGGTAACGGCTCACCAAGCCGACGATCCATAGCTGGTTTGAGAGGATGATCAGCAACACTGGGACTGAGACACGGCCCAGACTCCTACGGGAGGCAGCAGTGGGGAATATTGGACAATGAGCGAAAGCTTGATCCAGTTAAATTACATGTATGAAGACAATATTTAATTTTAAATTACCTCAAAAACTATAATAATGATTAAGT…	0	0	0	0.000839983	0	0	0	0	0	0	0	0	0	Bacteria	Proteobacteria	Alphaproteobacteria	Rhodobacterales	Rhodobacteraceae	NA
OTU_39995	ACGAACGCTGGCGGCAGGCCTAACACATGCAAGTCGAGCGCACTCTTCGGAGTGAGCGGCGGACGGGTTAGTAACGCGTGGGAATATGTCCAATGGTAAGGAATAGCCTCTGGAAACGGAGAGTAATACCTTATGTGCCCTTCGGGGGAAAGATTTATCGCTCAAGGATTAGCCCGCGTCAGATTAGATAGTTGGTGAGGTAACGGCTCACCAAGTCGACGATCTGTAGGGGGTCTGAGAGGATGATCCCCCACACTGGTACTGAGACACGGACCAGACTCCTACGGGAGGCAGCAGTGAGGAATATTGGACAATGGGGGAAACCCTGATCCAGCCATGCCGCGTGAGTGAAGACGGCCTTAGGGTTGTAAAGCTCTTTCAATTGCGAAGATAATGACG…	0	0	0	0	0	0	0.00160128	0	0	0	0	0	0	Bacteria	Proteobacteria	Alphaproteobacteria	Alphaproteobacteria_Incertae_Sedis	Unknown_Family	NA
OTU_39996	ACGAACGCTGGCGGCAGGCTTAACACATGCAAGTCAAGGGGCTCTTCGGAGCACCGGCGCACGGGTGAGTAACGCGTGGGAATATACCCTTAGGTAAGGAATAACGTAGAGAAATTTACGCTAATACCTTATAATGTCTTTGGACCAAAGATTTATCGCCTAAGGATTAGCCCGCGTTAGATTAGATAGTTGGTGAGGTAACGGCTCACCAAGTCGACGATCTATAGGGGGTCTGAGAGGATGATCCCCCACACTGGTACTGAGACACGGACCAGACTCCTACGGGAGGCAGCAGTGAGGAATATTGGACAATGGGGGAAACCCTGATCCAGCCATGCCGCGTGAGTGAAGAAGGCCTTAGGGTTGTAAAGCTCTTTCAATTGCGAAGATAATGACGGT…	0	0	0	0	0	0	0	0	0.00223464	0	0	0	0	Bacteria	Proteobacteria	Alphaproteobacteria	Alphaproteobacteria_Incertae_Sedis	Unknown_Family	NA
OTU_39998	ACGAACGCTGGCGGCAGGCCTAACACATGCAAGTCGAGCGCTCTTTCGGGAGAGCGGCGGACGGGTGAGTAACGCGTGGGGATGTGCCCTTCACTGCGGAATAGCCTCTGGAAACGGAGAGTAATACCGCATACGCCCTTCGGGGGAAAGAATTTCGGTGAAGGATCAACCCGCGTTGGATTAGGTAGTTGGTGGGGTAACGGCCCACCAAGCCGACGATCCATAGCTGGTTTGAGAGGATGATCAGCCACACTGGGACTGAGATACGGCCCAGACACCTACGGGTGGCTGCAGTCGAGAATCTTCGGCAATGGACGAAAGTCTGACCGAGCGACGCCGCGTGCGGGATGAAGGCCCTCGGGTTGTAAACCGCTGTCAGTTAGGAGGAAATGCATGAGG…	0	0	0	0	0	0	0	0	0.00223464	0	0	0	0	Bacteria	Planctomycetes	Planctomycetacia	Planctomycetales	Planctomycetaceae	Thermostilla
OTU_39999	ATGAACGCTGGCGGTATGCCTAACACATGCAAGTTGAACGAAAGCTTCTGCTTTAGTAGCGGACGGGTGAGTAATACGTGAGAATCTACCTTCAGGAAGGGAATAACAGATGGAAACAACTGCTAATGCCCTATATGCTGAAAAGTGAAATAGAGTAATCTGCCAGAAGATGAGCTCACGCCTGATTAGCTAGTTGGTAGAGTAAAAGCCTACCAAGGCAATGATCAGTAGCTGGTTTGAGAGGATGATCAGCCACACTGGTACTGAGACACGGACCAGACTCCTACGGGAGGCAGCAGTTAGGAATATTGGACAATGGGGGCAACCCTGATCCAGCCATGCCGCGTGAGTGAAGACGGCCTTAGGGTTGTAAAGCTCTTTCAGATGTGAGGATAATGA…	0	0	0	0	0	0	0	0	0	0.000914913	0	0	0	Bacteria	Proteobacteria	Alphaproteobacteria	NA	NA	NA
OTU_40000	ATGAACGCTGGCGGCGTGCTTAACACATGCAAGTCGAACGAACTCTTCGGAGTGAGTGGCGGACGGGTGAGTAACGCGTGAGGATCTGCCTTCAGGAGGGGGACAACAGTTGGAAACGACTGCTAATACCCCATATGCCTACGGGTGAAACGGTGAATTCCGCCTGAAGATGAACTCGCGTCAGATTAGCTAGTTGGTGGGGTAAGGGCCTACCAAGGCGACGATCTGTAGCTGGTCTGAGAGGATGATCAGCCACACTGGAACTGAGACACGGTCCAGACTCCTACGGGAGGCAGCAGTGGGGAATATTGGGCAATGGGCGCAAGCCTGACCCAGCCATGCCGCGTGTGTGAAGAAGGCTCTAGGGTTGTAAAGCACTTTAAGTAGGGAGGAAAGGGT…	0	0	0	0	0	0	0	0	0	0.000914913	0	0	0	Bacteria	Proteobacteria	Gammaproteobacteria	Cellvibrionales	Cellvibrionaceae	NA
OTU_40002	ATGAACGCTAGCGGGAGGCTTAATACATGCAAGTCGAACGGCAGCATAGGACTTCGGTCCTGATGGCGAGTGGCGCACGGGTGAGTAACGCGTACGTACCTACCTTATACTGGGGAACATATACTGGAAACGGAGTAAATGCCCCATAGTATCCTTCGGGATTAAAGCTTCGGCGGTATAAGATGGACGTGCGTTAGATTAGGTAGTTGGTGGAGTAACGGTTCACCAAGCCGACGATCTATAGGGGGCGTGAGAGCGTGATCCCCCACACGGGTACTGAGACACGGACCCGACTCCTACGGGAGGCAGCAGTAAGGAATATTGGACAATGGACGCAAGTCTGATCCAGCCATCCCGCGTGCAGGATGAAGGCGCTCAGCGTTGTAAACTGCTTTTATC…	0	0	0	0	0	0	0	0	0	0.000914913	0	0	0	Bacteria	Bacteroidetes	Sphingobacteriia	Sphingobacteriales	Saprospiraceae	NA
OTU_40003	ACGAACGCTGGCGGCAGGCTTAACACATGCAAGTCGAACGCGAAAGCCCTTCGGGGTGAGTAGAGTGGCGCACGGGTGAGTAACGCGTGGGAATGTACCGTTTAGTACGGAATAACTTCGGGAAACTGGAGTTAATACCGTATACGCCCTCCGGGGGAAAGATTTATCGCTAAACGATCAGCCCGCGTGACATTAGATAGTTGGTGGGGTAATGGCCTACCAAGTCTACGATCTATAGCTGGTTTGAGAGGATGATCAGCAACACTGGGACTGAGACACGGCCCAGACTCCTACGGGAGGCAGCAGTGGGGAATCTTGGACAATGGGCGCAAGCCTGATCCAGCCATGCCGCGTGAGTGACGAAGGCCTTAGGGTCGTAAAGCTCTTTCGCCTGTGAAG…	0	0	0	0	0	0	0	0	0	0.000914913	0	0	0	Bacteria	Proteobacteria	Alphaproteobacteria	Rhodobacterales	Rhodobacteraceae	NA
OTU_40004	ATGAACGCTGGCGGCGTGCTTAACACATGCAAGTCGAACGAACTCTTCGGAGTGAGTGGCGGACGGGTGAGTAACGCGTGAGGATCTGCCTTCAGGAGGGGGACAACAGTTGGAAACGACTGCTAATACCCCATATGCCTACGGGTGAAACGGTGAATTCCGCCTGAAGATGAACTCGCGTCAGATTAGCTAGTTGGTGGGGTAAGGGCCTACCAAGGCGACGATCTGTAGCTGGTCTGAGAGGATGATCAGCCACACTGGGACTGAGACACGGCCCAGACTCCTACGGGAGGCAGCAGTGGGGAATATTGGACAATGGGGGAAACCCTGATCCAGCGATGCCGCGTGTGTGAAGAAGGCCTTAGGGTTGTAAAGCACTTTAGTTGGGGAGGAAGAAGT…	0	0	0	0	0	0	0	0	0	0.000914913	0	0	0	Bacteria	NA	NA	NA	NA	NA
OTU_40005	ACGAACGCTGGCGGCAGGCTTAACACATGCAAGTCGAACGCTCCCTTCGGGGAGAGTGGCAGACGGGTGAGTAACGCGTGGGGATATACCTATCGGTAGGGAACAACAGTTGGAAACGACTGCTAATACCTTATACGTCCTTCGGGAGAAAGATTTATCGCCGATAGATTAACCCGCGTTAGATTAGCTAGTTGGTAGGGTAATGGCCTACCAAGGCGACGATCTATAGCTGGTCTGAGAGGATGATCAGCCACACTGGGACTGAGACACGGCCCAGACTCCTACGGGAGGCAGCAGTGGGGAATATTGGACAATGGGGGAAACCCTGATCCAGCGATGCCGCGTGTGTGAAGAAGGCCTTAGGGTTGTAAAGCACTTTAGTTGGGGAGGAAGAAGTCA…	0	0	0	0	0	0	0	0	0	0.000914913	0	0	0	Bacteria	Proteobacteria	Alphaproteobacteria	NA	NA	NA
OTU_40006	ACGAACGCTGGCGGCAGGCCTAACACATGCAAGTCGAACGAACCTTCGGGTTAGTGGCGCACGGGTGCGTAACGCGTGGGAACCTACATCTAGGTGCGGAATAACACAGAGAAATTTGTGCTAATACCGCATAATATCTCCGGATCAAAGATTTATCGCCTAGGGATGGGCCCGCGTTAGATTAGCTAGTTGGTGAGGTAATTGCTCACCAAGGCGACGATCTATAGCTGGTCTTAGAGGACGATCAGCCACACTGGTACTGAGACACGGACCAGACTCCTACGGGAGGCAGCAGTGAGGAATATTGGACAATGGGGGCAACCCTGATCCAGCCATGCCGCGTGAATGAAGAAGGCCTTAGGGTTGTAAAATTCTTTCAGATGCGAAGATAATGACGGT…	0	0	0	0	0	0	0	0	0	0.000914913	0	0	0	Bacteria	Proteobacteria	Alphaproteobacteria	Alphaproteobacteria_Incertae_Sedis	NA	NA
OTU_40007	ATGAACGCTGGCGGCGTGCTTAACACATGCAAGTCGAACGAACACTTTCGGGTGTTAGTGGCGGACGGGTGAGTAACGCGTGAGGATCTGCCCTTAGGTGGGGGACAACAGTTGGAAACGACTGCTAATACCGCATATGGCGAGAGCTAAAAGATTTATTGCCTGAGGATGAACTCGCGTCTGATTAGCTAGTTGGGGGTGTAATGGACTCCCAAGGCGACGATCAGTAGCTGGTCTGAGAGGATGATCAGCCACACTGGAACTGAGACACGGTCCAGACTCCTACGGGAGGCAGCAGTGGGGAATATTGGGCAATGGGCGCAAGCCTGACCCAGCCATGCCGCGTGTGTGAAGAAGGCTCTAGGGTTGTAAAGCACTTTAAGTAGGGAGGAAAGGGTG…	0	0	0	0	0	0	0	0	0	0.000914913	0	0	0	Bacteria	Proteobacteria	Gammaproteobacteria	NA	NA	NA
OTU_40008	ACGAACGCTGGCGGCAGGCTTAACACATGCAAGTCGAACGCCCTCTTCGGAGGGAGTGGCAGACGGGTGAGTAACGCGTGGGGAACTACCTATCAGTACGGAACAACAGTTAGAAATGACTGCTAATACCGTATACGTCCTTAGGGAGAAAGATTTATCGCTGATAGATGTACCCGCGTTAGATTAGCTAGTTGGTGAGGTAATGGCTCACCAAGGCGACGATCTATAGCTGGTCTGAGAGGATGATCAGCCACACTGGGACTGAGACACGGCCCAGACTCCTACGGGAGGCAGCAGTGGGGAATATTGGACAATGGGCGCAAGCCTGATCCAGCAATACCTCGTGTGTGAAGAAGGCCTTAGGGTTGTAAAGCACTTTCAATTGGGACGAAGGTTGGT…	0	0	0	0	0	0	0	0	0	0	0.00141643	0	0	Bacteria	Proteobacteria	Alphaproteobacteria	NA	NA	NA
OTU_40009	ACGAACGCTGGCGGCAGGCTTAACACATGCAAGTCGAACGCCCTCTTCGGAGGGAGTGGCAGACGGGTGAGTAACGCGTGGGAAACTACCTATCAGTACGGAACAACAGTTAGAAATGACTGCTAATACCGTATACGTCCTTCGGGAGAAAGATTTATCGCTGATAGATGTGCCCGCGTTAGATTAGCTAGTTGGTGAGGTAATGGCTCACCAAGGCGACGATCTATAGCTGGTCTGAGAGGATGATCAGCCACACTGGGACTGAGACACGGCCCAGACTCCTACGGGAGGCAGCAGTGGGGAATATTGGACAATGGGCGCAAGCCTGATCCAGCAATACCTCGTGTGTGAAGAAGGCCTTAGGGTTGTAAAGCACTTTCAATTGGGACGAAGGTTGGT…	0	0	0	0	0	0	0	0	0	0	0.00141643	0	0	Bacteria	Proteobacteria	Alphaproteobacteria	NA	NA	NA
OTU_40011	ACGAACGCTGGCGGCAGGCTTAACACATGCAAGTCGAACGGTCTCTTCGGAGGCAGTGGCAGACGGGTGAGTAACGCGTGGGAACCTACCTATTTCTACGGAACAACAGTTGGAAACGACTGCTAATACCGTATACGCCCTTCGGGGGAAAGATTTATCGGAAATAGATGGGCCCGCGTTAGATTAGCTAGTTGGTGAGGTAATGGCTCACCAAGGCGACGATCTATAGCTGGTCTGAGAGGATGATCAGCCACACTGGGACTGAGACACGGCCCAGACTCCTACGGGAGGCAGCAGTGGGGAATATTGGACAATGGGCGCAAGCCTGATCCAGCAATACCTCGTGTGTGAAGAAGGCCTTAGGGTTGTAAAGCACTTTCAATTGGGACGAAGGTTGGT…	0	0	0	0	0	0	0	0	0	0	0	0.00122699	0	Bacteria	Proteobacteria	Alphaproteobacteria	Rhizobiales	Phyllobacteriaceae	NA
OTU_2114	ACGAACGCTGGCGGCAGGCTTAACACATGCAAGTCGAACGCCCTCTTCGGAGGGAGTGGCAGACGGGTGAGTAACGCGTGGGAAACTACCTATCAGTACGGAACAACAGTTAGAAATGACTGCTAATACCGTATACGTCCTTCGGGAGAAAGATTTATCGCTGATAGATGTGCCCGCGTTAGATTAGCTAGTTGGTGAGGTAATGGCTCACCAAGGCGACGATCTATAGCTGGTCTGAGAGGATGATCAGCCACACTGGGACTGAGACACGGCCCAGACTCCTACGGGAGGCAGCAGTGGGGAATATTGGACAATGGGCGAAAGCCTGATCCAGCCATGCCGCGTGTGTGATGAAGGCCCTAGGGTTGTAAAGCACTTTCAATGGTGAAGATAATGACG…	0	0	0	0	0	0	0	0	0	0.000457457	0	0	0	Bacteria	Proteobacteria	Alphaproteobacteria	Rhizobiales	Phyllobacteriaceae	NA
